# Supplementary material for: Studies related to the design and synthesis of a molecular octal counter
Source: Royal Society of Chemistry journal article supplement (doi:10.1039/b008224o), 2001-01-01

Supplementary Information

**Studies Related to the Design and Synthesis of a Molecular Octal Counter**

Dorota Gryko,<sup>a</sup> Junzhong Li,<sup>a</sup> James R. Diers,<sup>b</sup> Kristian M. Roth,<sup>b</sup> David F. Bocian,<sup>\*b</sup>

Werner G. Kuhr,<sup>\*b</sup> and Jonathan S. Lindsey<sup>\*a</sup>

<sup>a</sup>*Department of Chemistry, North Carolina State University, Raleigh, NC 27695-8204, USA*

<sup>b</sup>*Department of Chemistry, University of California, Riverside, California 92521-0403, USA*

Overlaid Spectra:

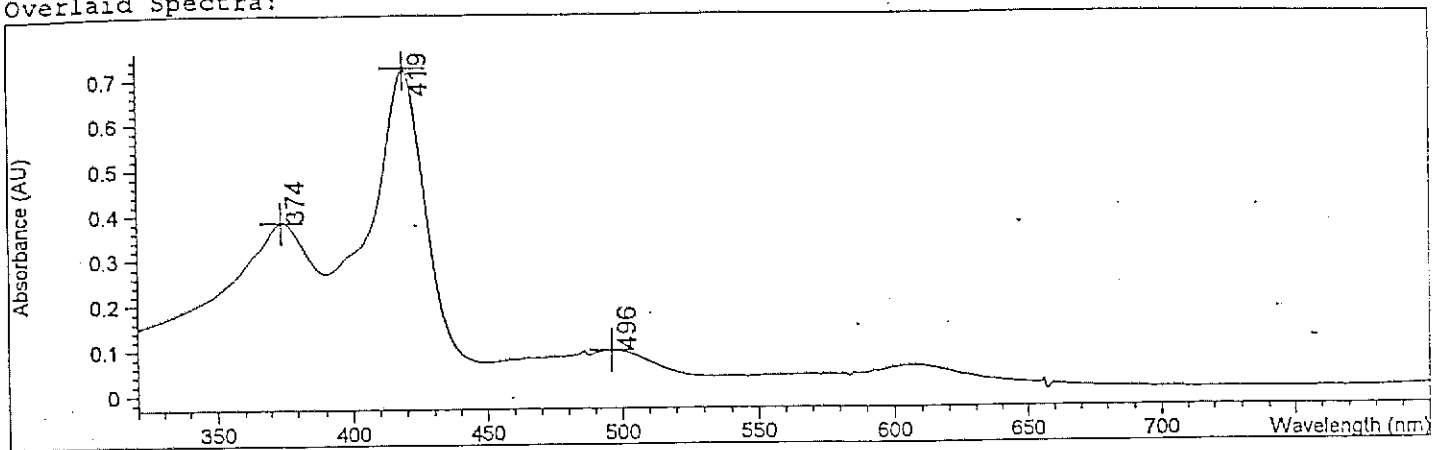

| # | Name | Peaks (nm) | Abs (AU)  |
|---|------|------------|-----------|
| 1 |      | 419.0      | 0.72349   |
| 1 |      | 374.0      | 0.38133   |
| 1 |      | 496.0      | 9.5603E-2 |

Report generated by :

Signature: .....

\*\*\* End Spectrum/Peak Report \*\*\*

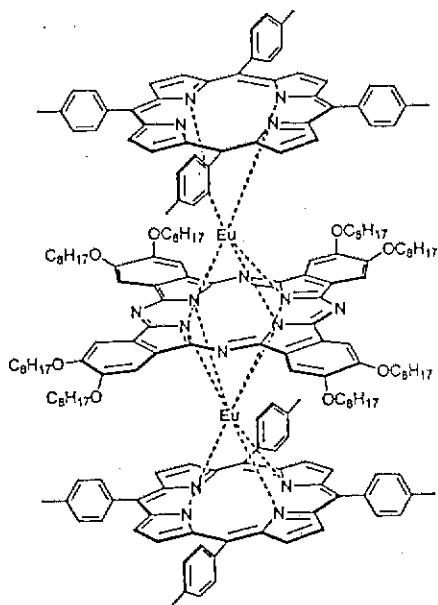

2a

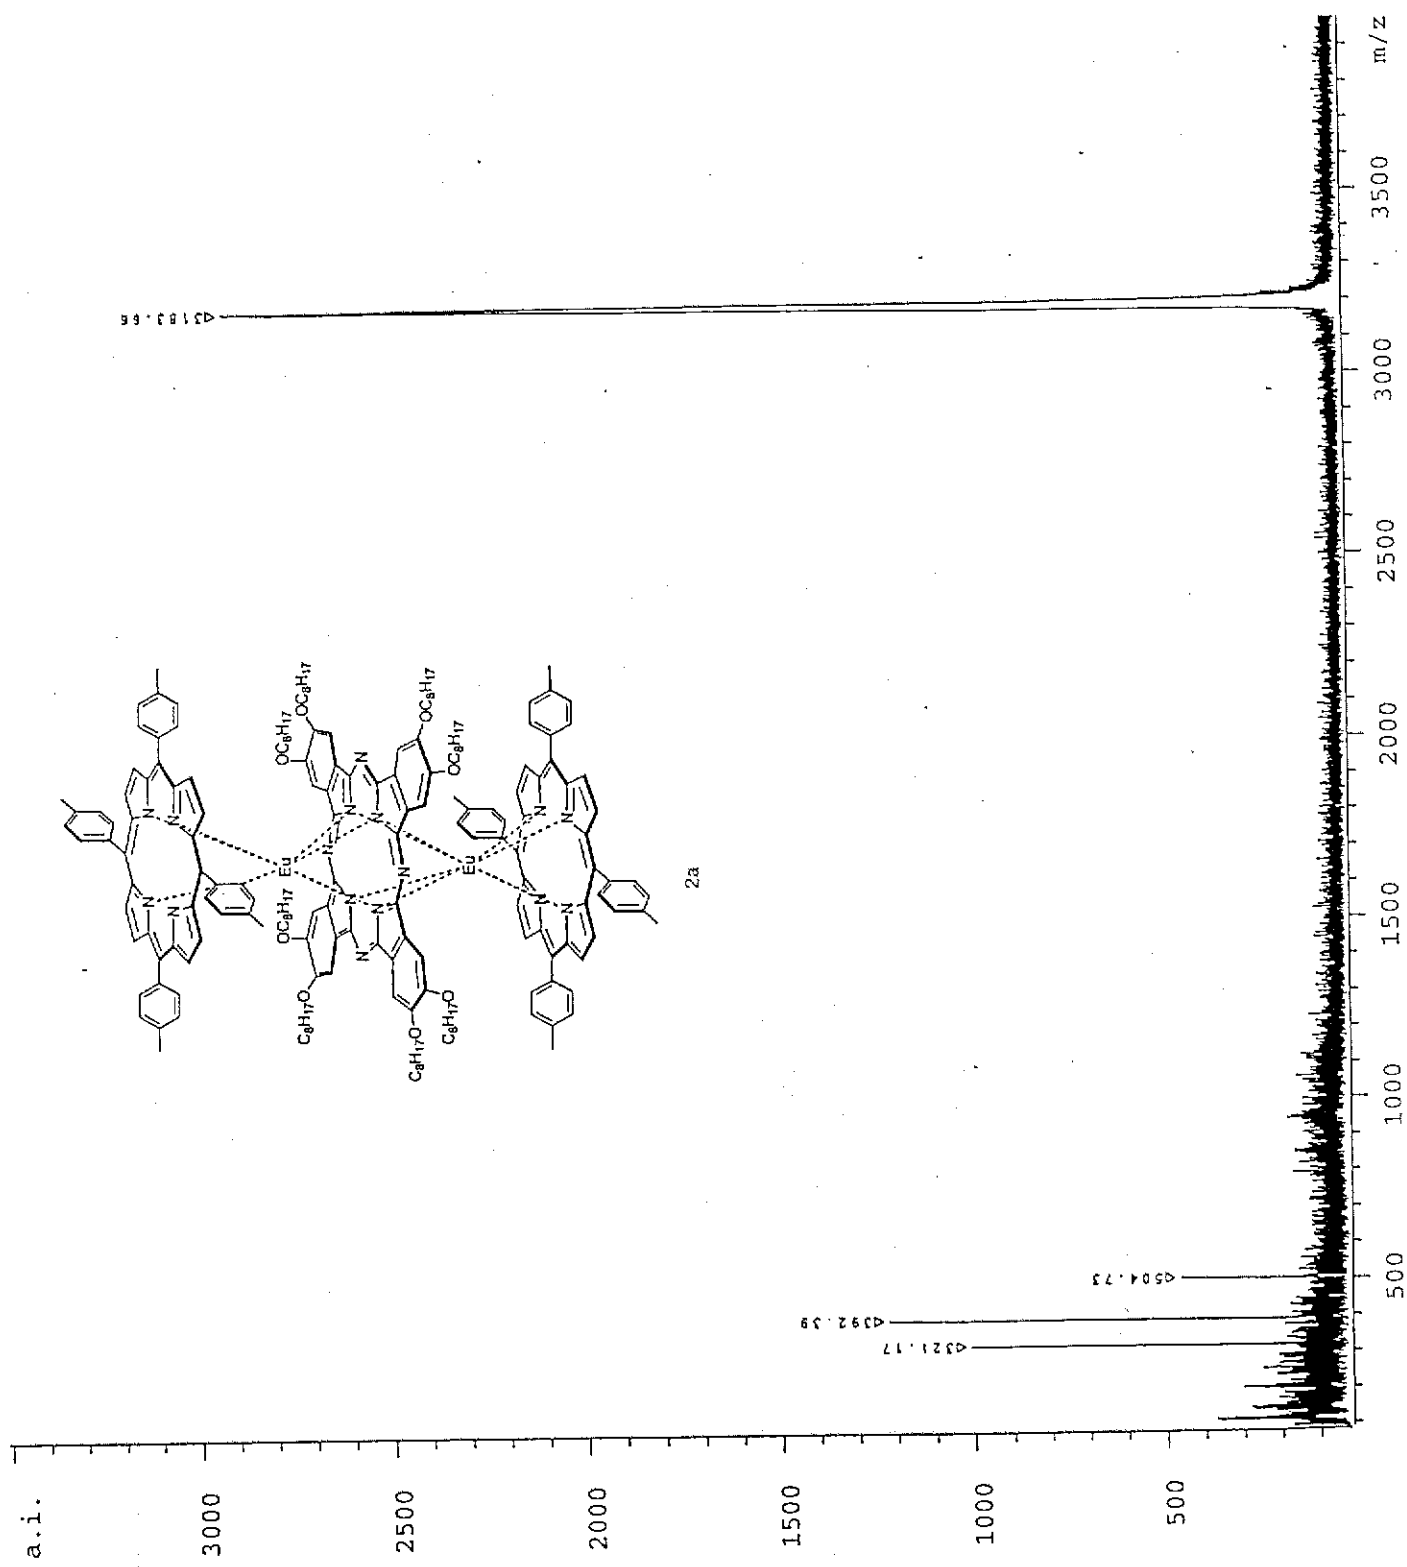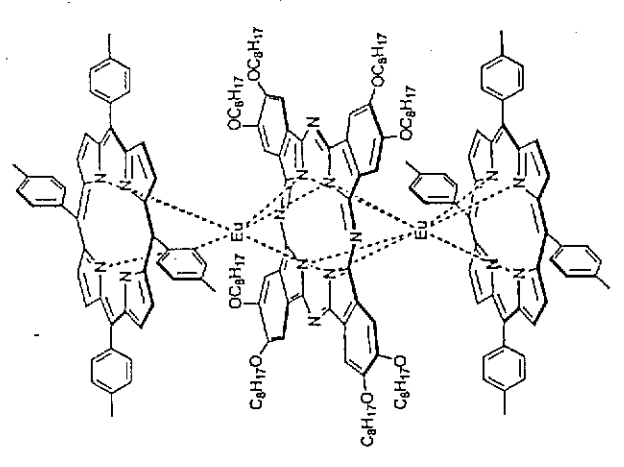

2a



Overlaid Spectra:

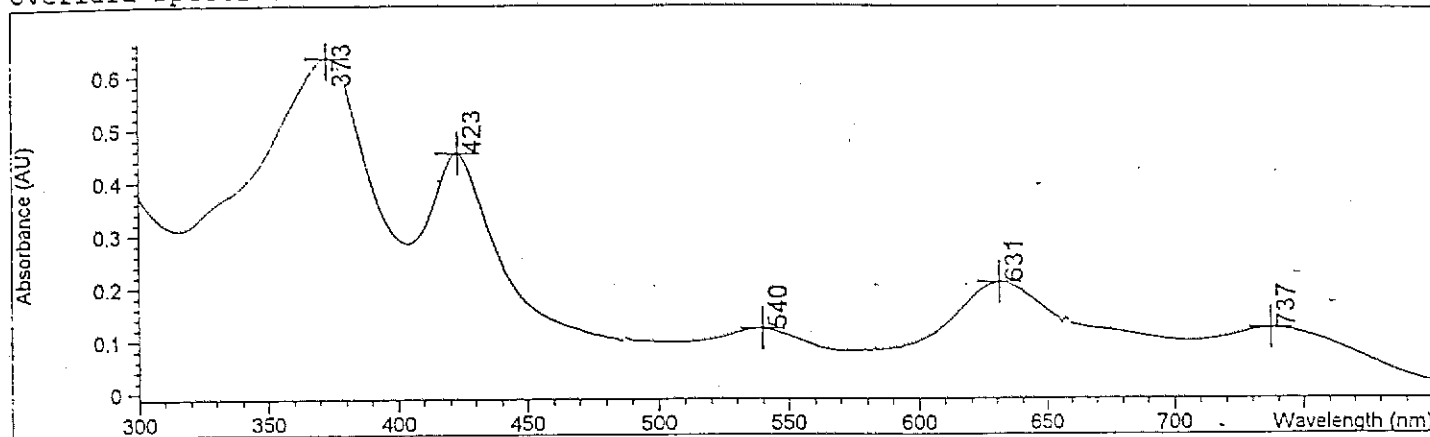

| # | Name | Peaks (nm) | Abs (AU) |
|---|------|------------|----------|
| 1 |      | 373.0      | 0.63424  |
| 1 |      | 423.0      | 0.45491  |
| 1 |      | 631.0      | 0.20887  |
| 1 |      | 540.0      | 0.12128  |
| 1 |      | 737.0      | 0.12065  |

Report generated by :

Signature: .....

\*\*\* End Spectrum/Peak Report \*\*\*

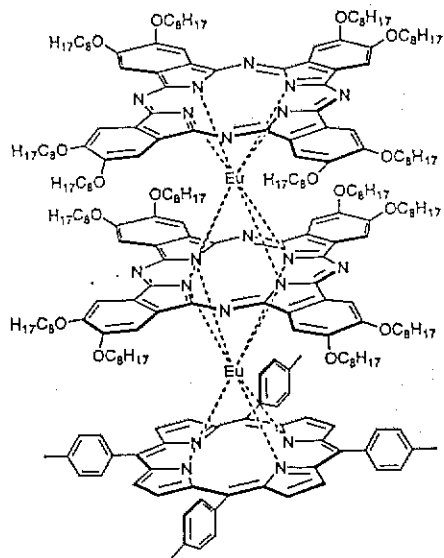

2c

44017

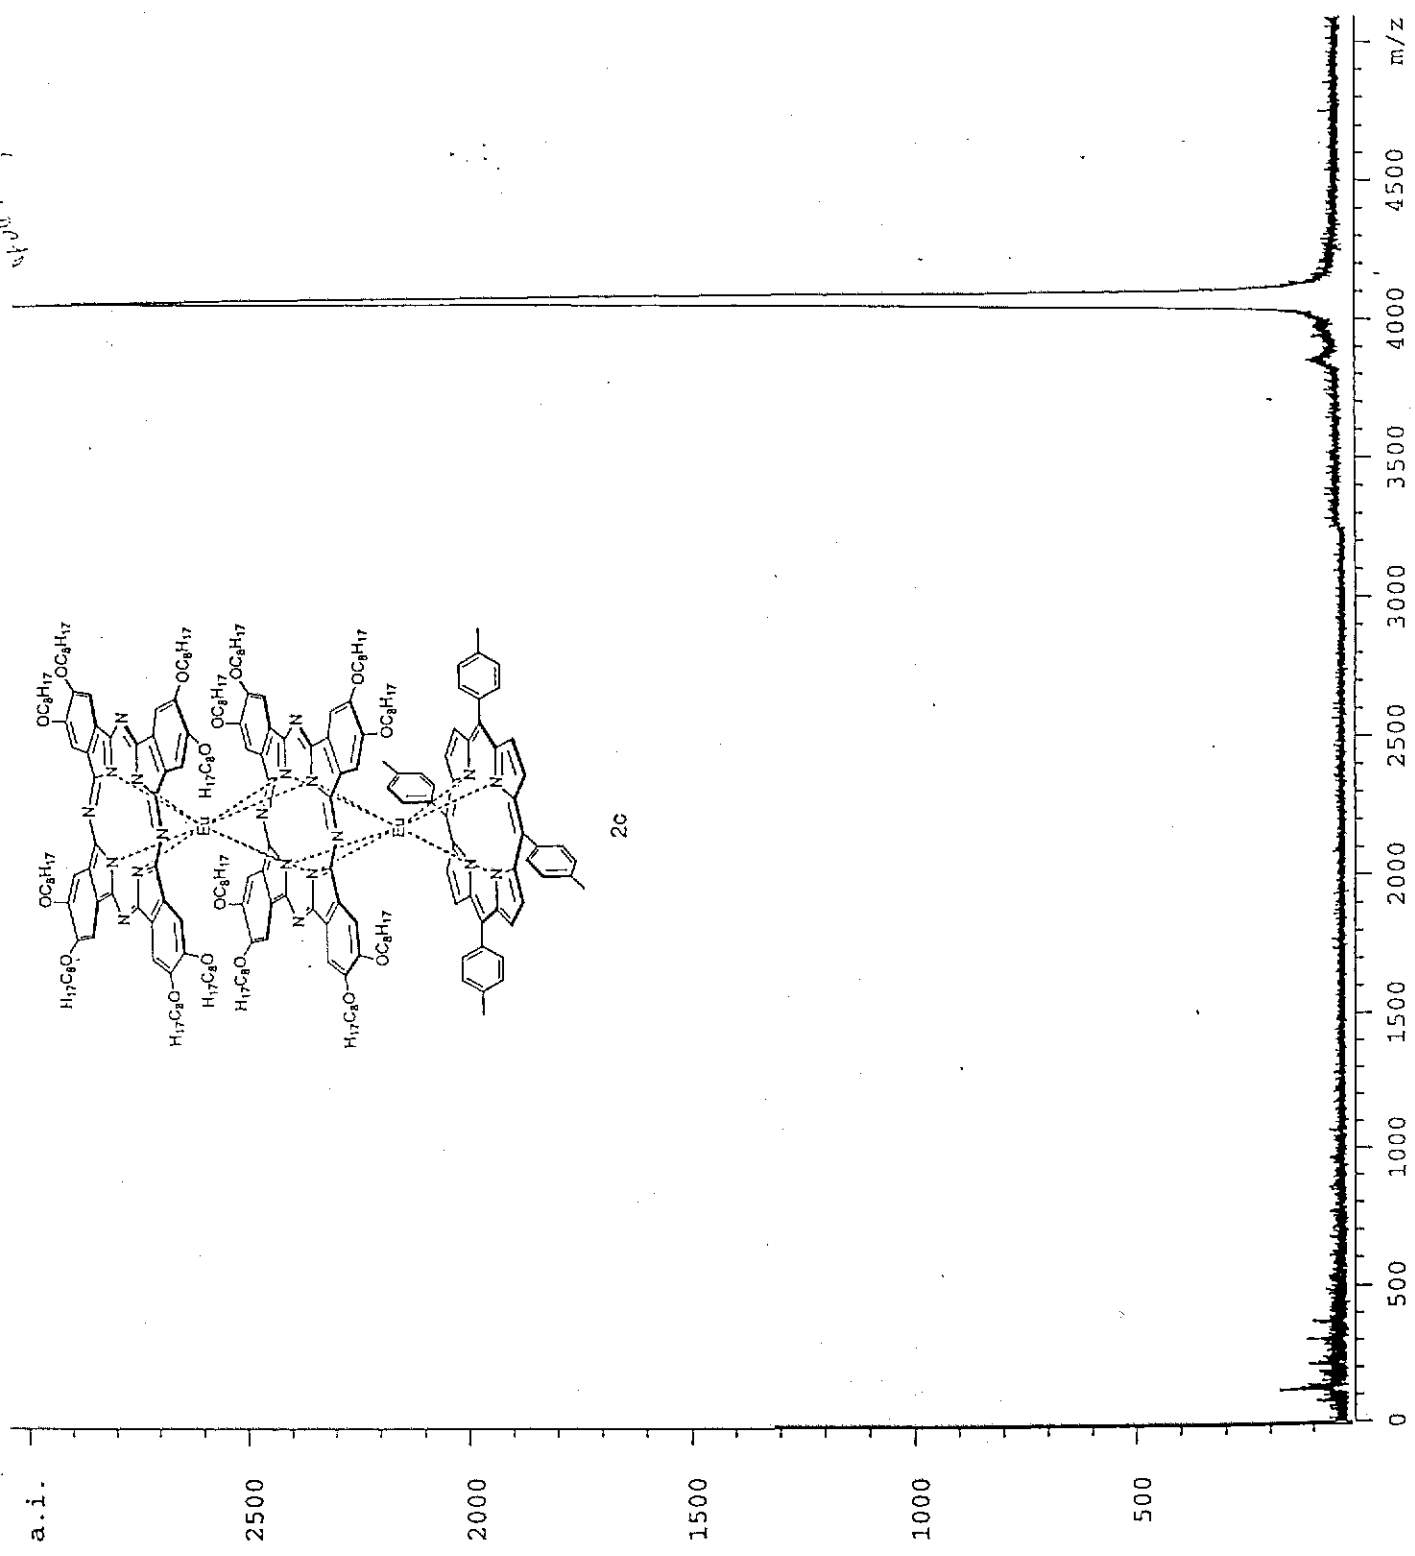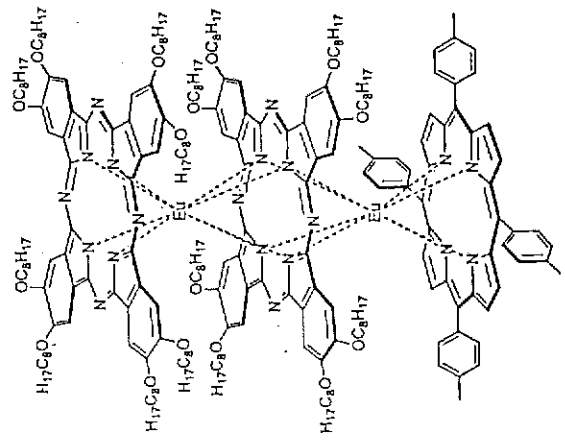

20



Overlaid Spectra:

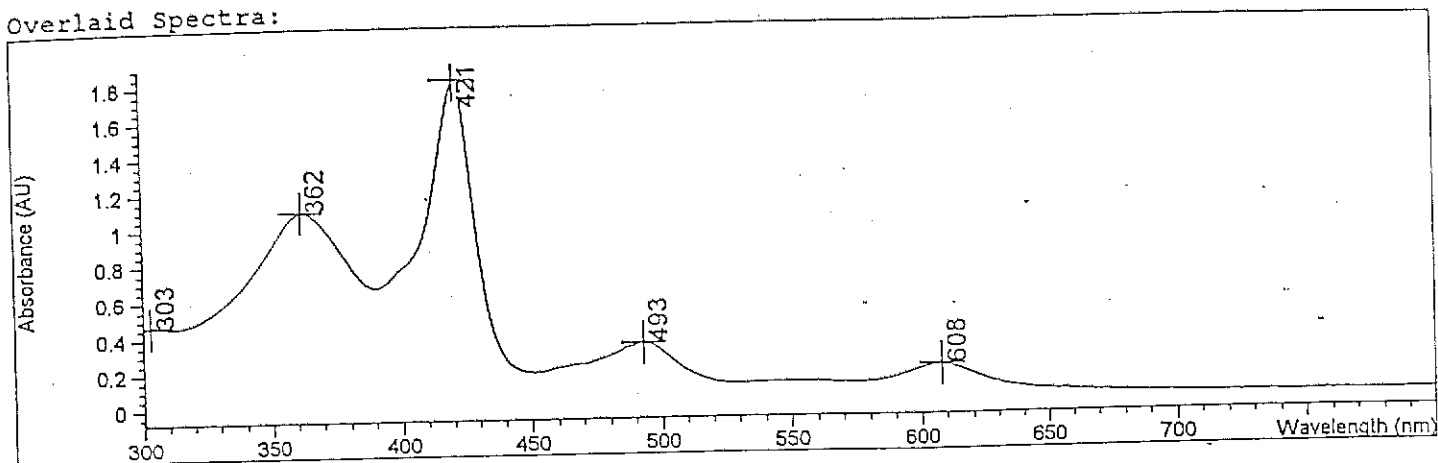

| # | Name | Peaks (nm) | Abs (AU) |
|---|------|------------|----------|
| 1 |      | 421.0      | 1.82580  |
| 1 |      | 362.0      | 1.09340  |
| 1 |      | 303.0      | 0.46674  |
| 1 |      | 493.0      | 0.34299  |
| 1 |      | 608.0      | 0.19885  |

Report generated by :

Signature: .....

\*\*\* End Spectrum/Peak Report \*\*\*

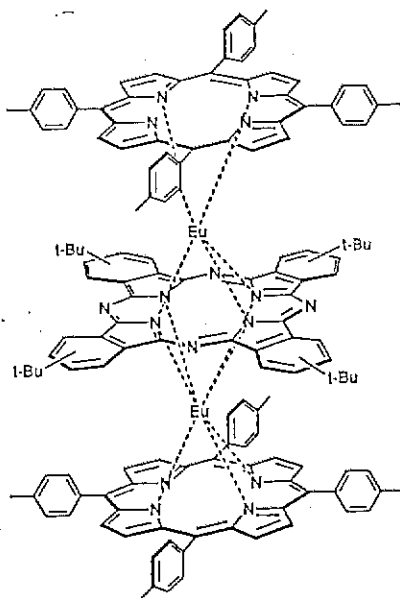



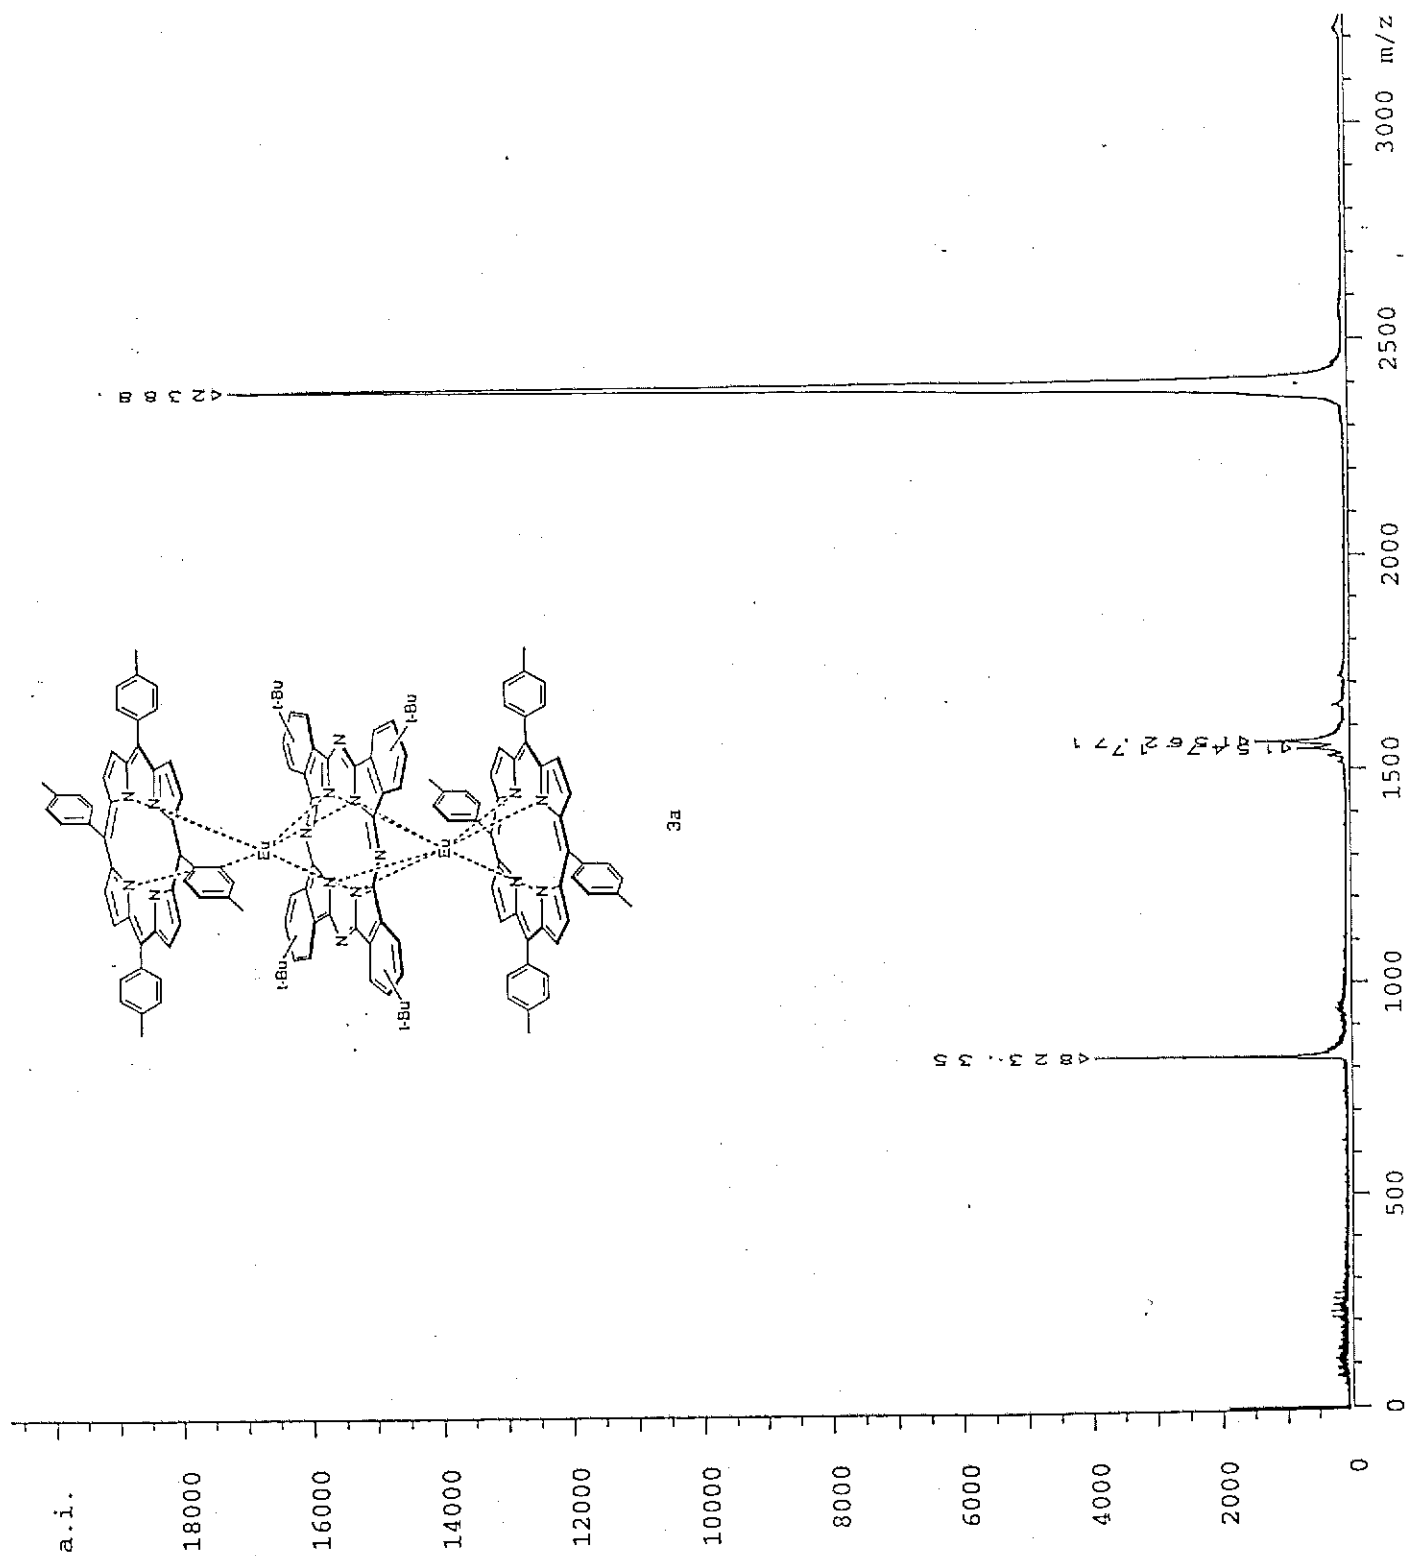

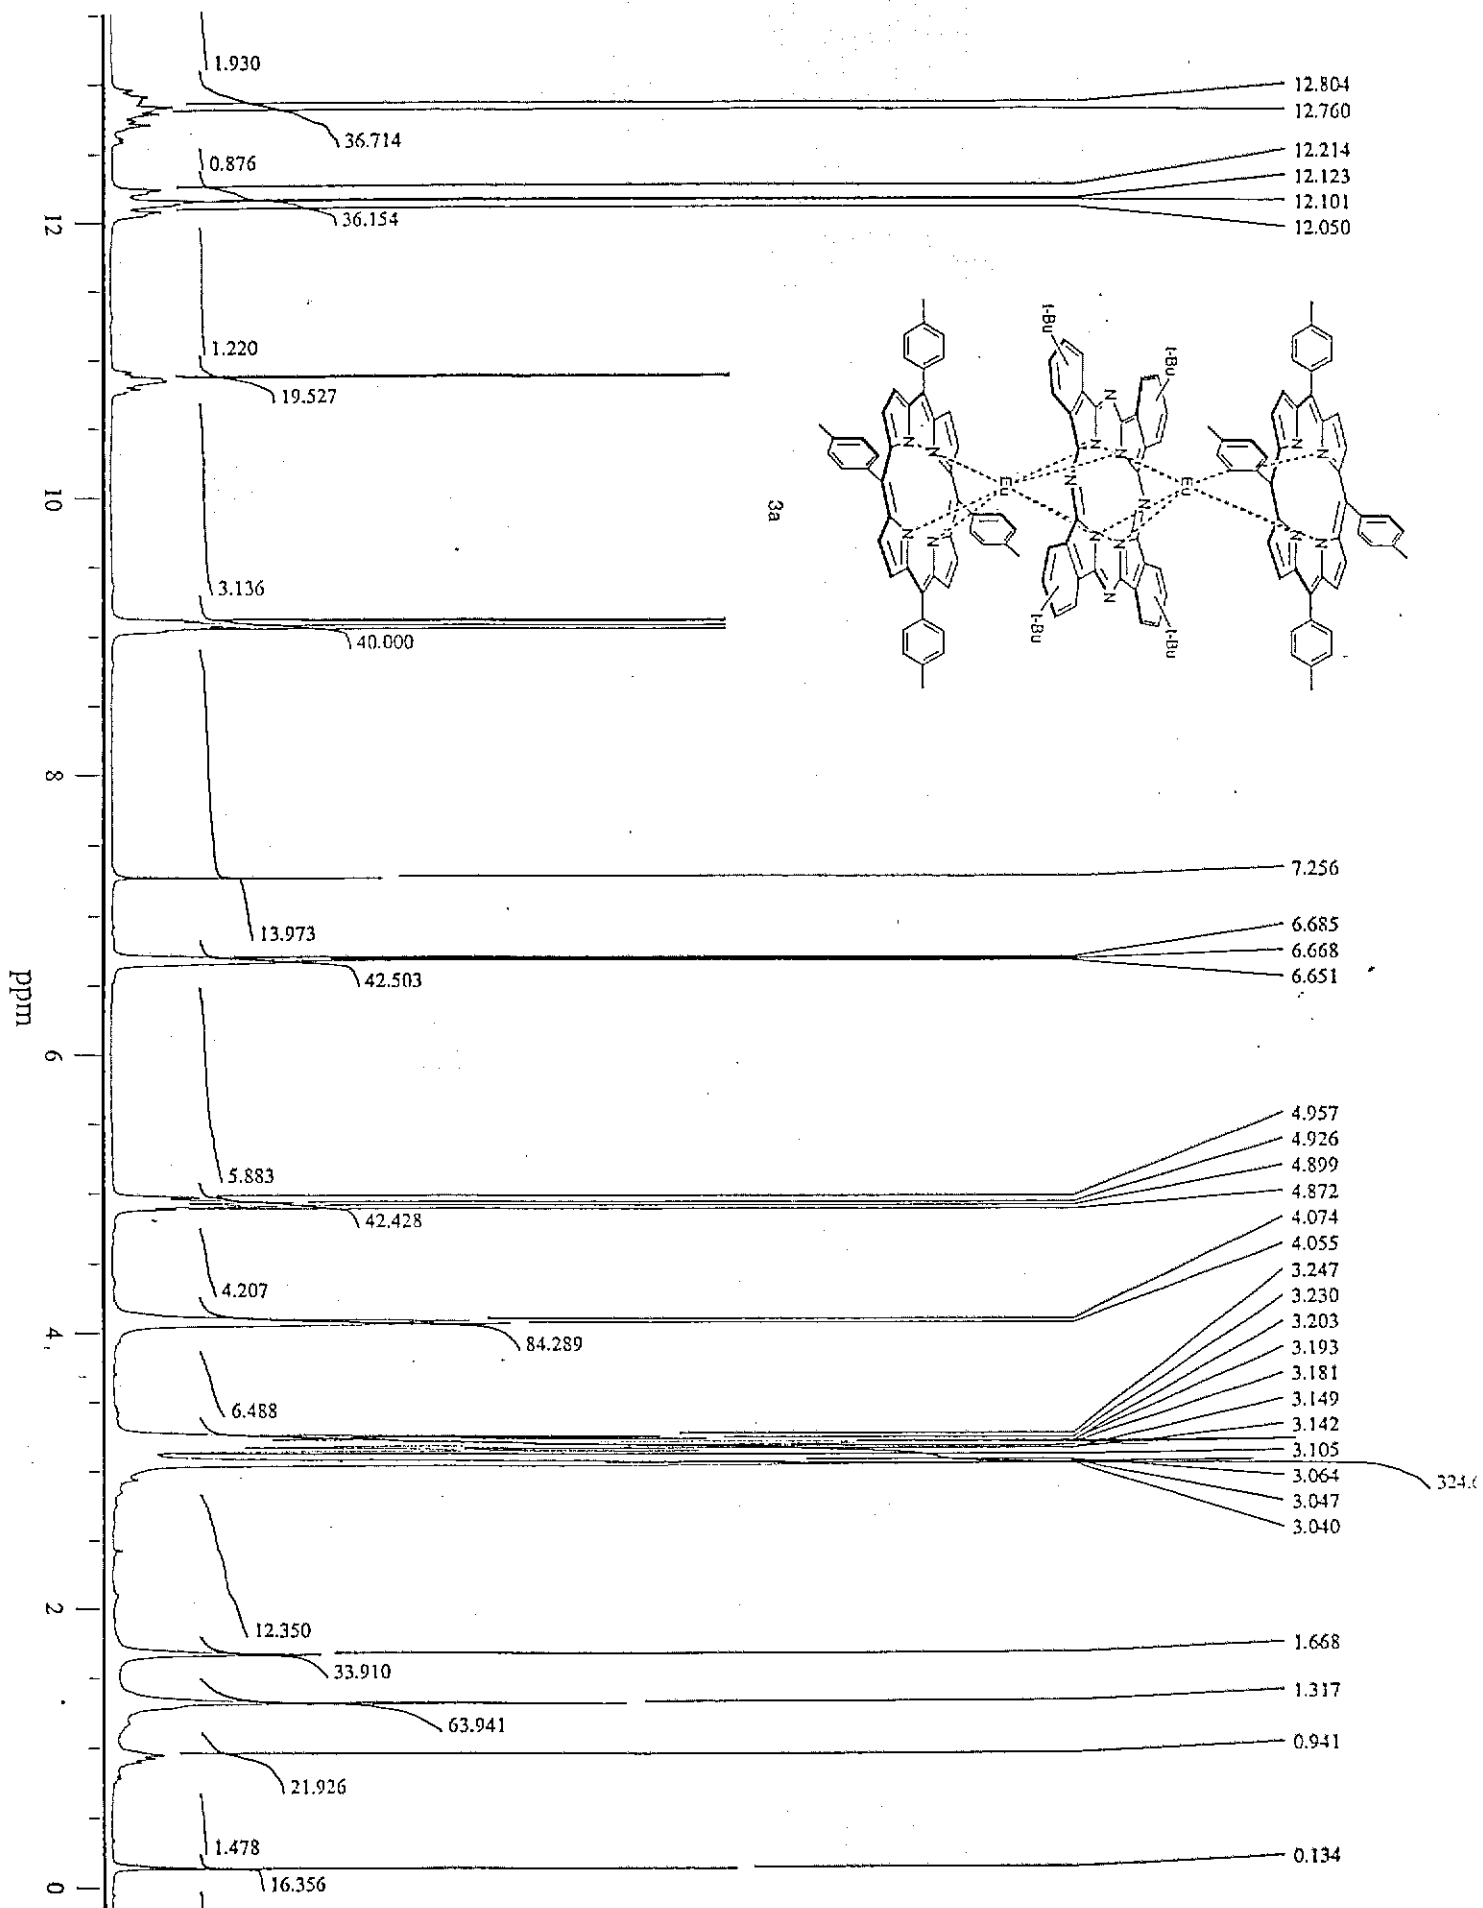

Supplement: b008224o1.pdf [file b008224o1.pdf]
