# Supplementary material for: Studies related to the design and synthesis of a molecular octal counter
Source: Royal Society of Chemistry journal article supplement (doi:10.1039/b008224o), 2001-01-01

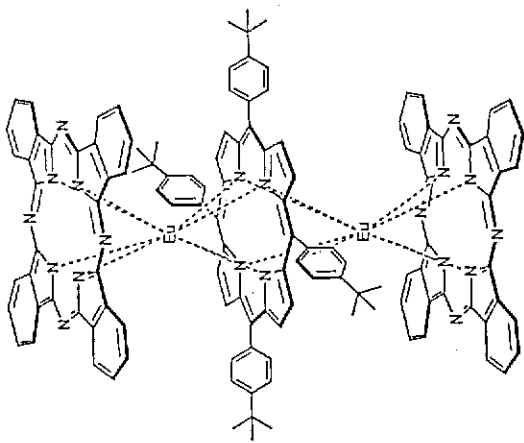

Method file : <untitled>  
 Information : Default Method  
 Data File : C:\HPCHEM\1\DATA\JUNZHONG\PC2TPEU.SD Created  
 : 8/16/00 11:40:17

Overlaid Spectra:

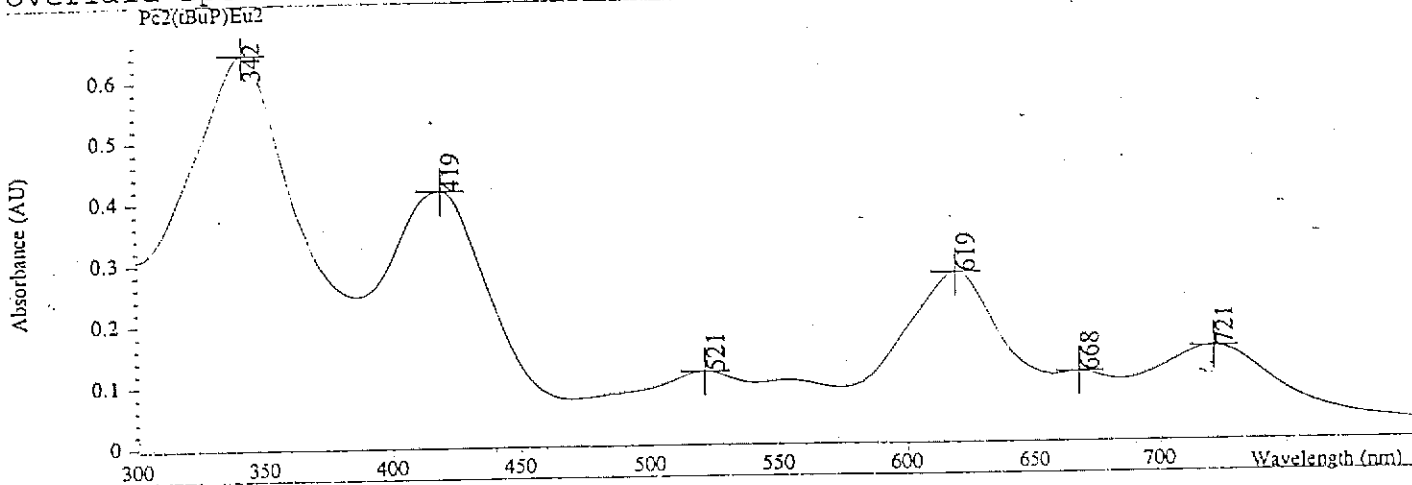

| # | Name           | Peaks (nm) | Abs (AU) |
|---|----------------|------------|----------|
| 1 | Pc2 (tBuP) Eu2 | 342.0      | 0.64420  |
| 1 |                | 419.0      | 0.41617  |
| 1 |                | 619.0      | 0.27386  |
| 1 |                | 721.0      | 0.14853  |
| 1 |                | 521.0      | 0.11638  |
| 1 |                | 668.0      | 0.10984  |

Report generated by :

Signature: .....

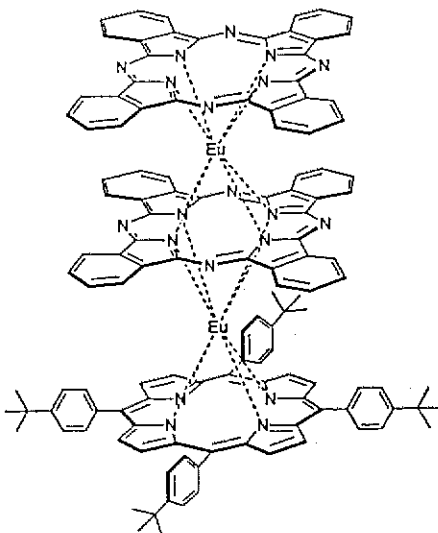

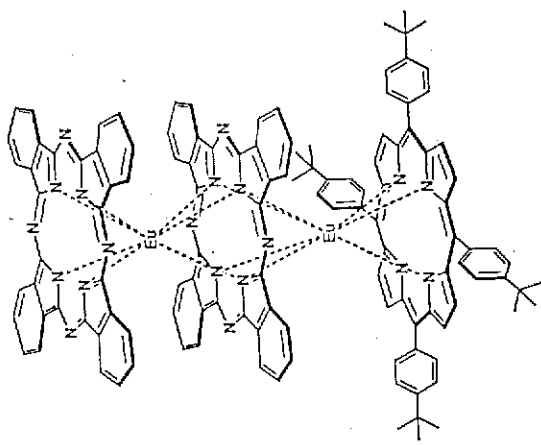

```

INSTRUM TOP
CIRCOM
SHIMADZU 003057
AQ DATE Tue Aug 15 11:11:05 2000
PATH /data/chemistry/LINDSEY/JUNZHONG
POLARI POS
APOP_m Reflector
TD 40000
S SHOTS 10
S SHOTM 0
S SHOPTS1 0
S SHOPTS2 0
S SHOPTS3 0
DM 1.00 [ns]
DELAY 0 [ns] [KV]
U1S1 18.50 [KV]
U1S2 18.50 [KV]
U1S3 0.00 [KV]
U1S4 0.00 [KV]
U1S5 7.50 [KV]
U1S6 10.00 [KV]
U1S7 0.00 [KV]
U1S8 1.55 [KV]
U1S9 9.00 [KV]
U1S10 1.00 [KV]
U1S11 1.00 [KV]
U1S12 1.00 [KV]
ATTEN 28.0
MG1 2071339.546
MG2 395.872
MG3 0.000
ALTURBO no
CDEON yes
CHARGE no
DEFLON no
PLASBND no
L1ASBND no
U1S1BND no
DPCALI 510.84 [Da]
DPCASS 200.00
L1NOVAL 0.33
L1NOVAL 0.28
L52BHDV 0.91
CMT1 Pc71(-BuP)Eu2
CMT2 actna28, 100 shots

```

a.i.

2500

2000

1500

1000

500

0

m/z

2157.89

/data/chemistry/LINDSEY/JUNZHONG/003057/1SRef/pdata/1 tof Tue Aug 15 14:44:24 2000

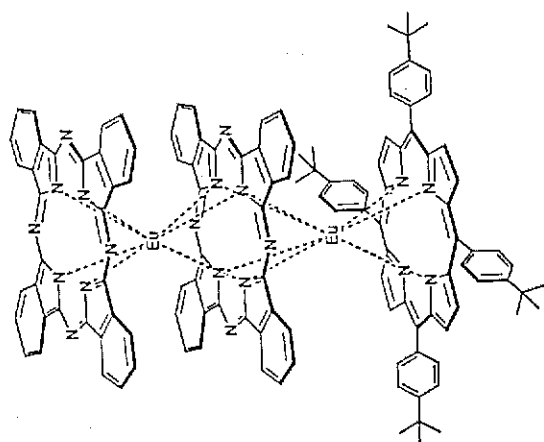

4c

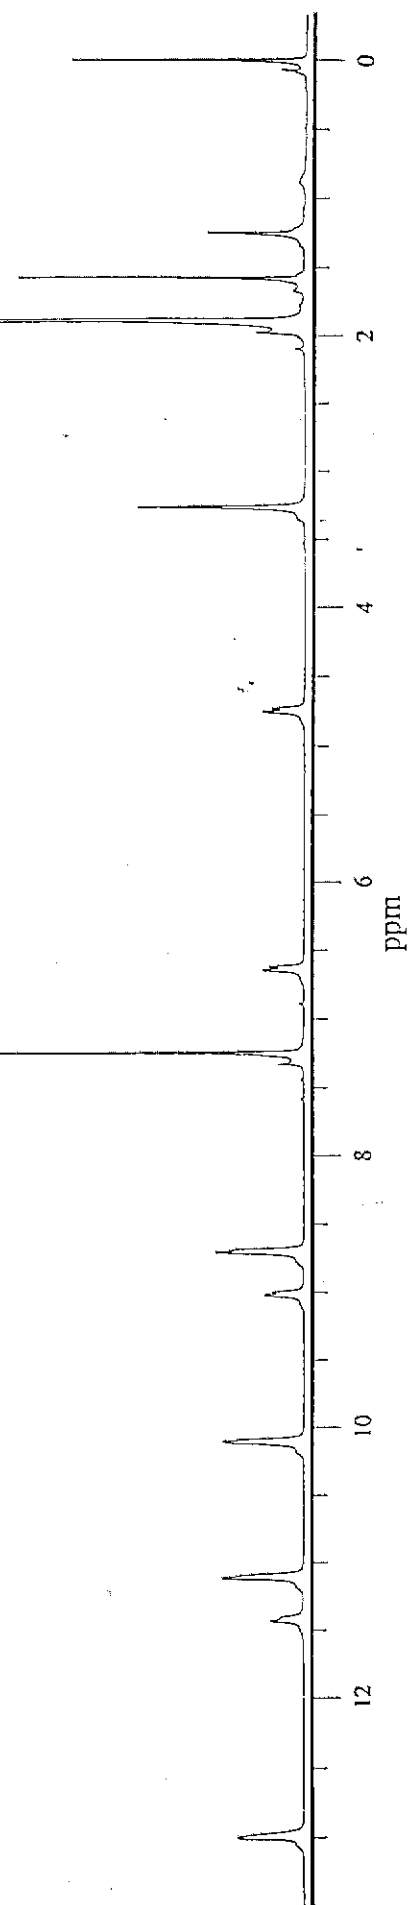

Method file : <untitled>  
 Information : Default Method  
 Data File : C:\HPCHEM\1\DATA\JUNZHONG\PNP2PCEU.SD Created  
 : 8/16/00 11:44:08

Overlaid Spectra:

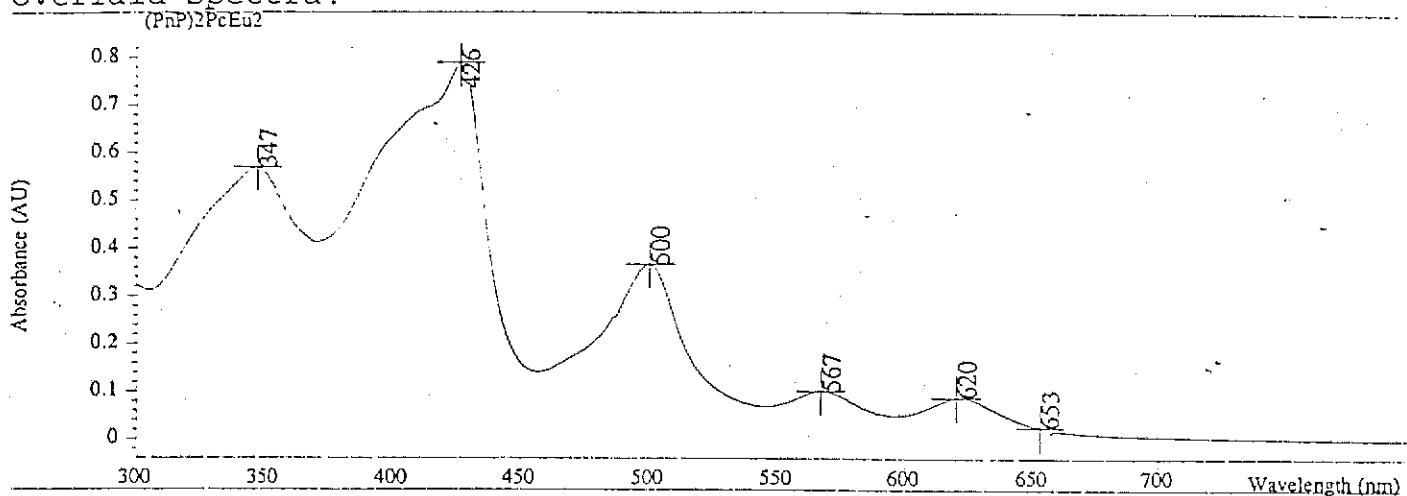

| # | Name        | Peaks (nm) | Abs (AU)  |
|---|-------------|------------|-----------|
| 1 | (PnP)2PcEu2 | 426.0      | 0.78951   |
| 1 |             | 347.0      | 0.56895   |
| 1 |             | 500.0      | 0.36712   |
| 1 |             | 567.0      | 0.10130   |
| 1 |             | 620.0      | 8.8177E-2 |
| 1 |             | 653.0      | 2.5073E-2 |

Report generated by :

Signature: .....

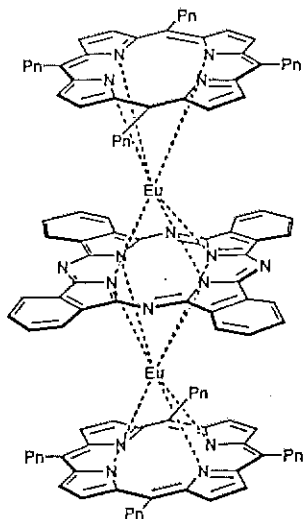

Pn = pentyl

5a

a.i.

3000

2500

2000

1500

1000

500

0

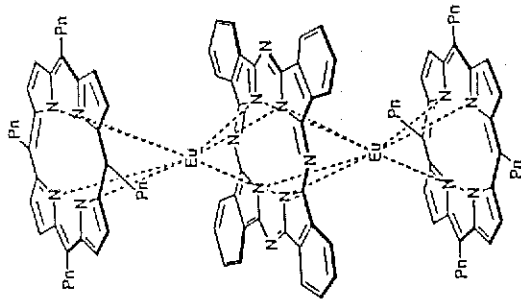

5a  
Pn = phenyl

INSTRUM TOF  
OptiU Unknown  
SPPNAM 003058  
AQ\_DATE Tue Aug 15 11:19:31 2000  
PRINTE /data/chemistry/LINDSEY/JUNZHONG  
POLARI Polaris Reflecto  
ACQF\_n 40000  
TD 100  
NCSLOTS 100  
SICNUM 0  
SWPTE1 0  
SWPTE2 0  
SWPTE3 0  
DM 1.00 [ns]  
DELAY 0 [ns]  
U1s1 20.00 [KV]  
U1s2 18.50 [KV]  
Uref1 0.00 [KV]  
Uref2 0.00 [KV]  
Uref3 10.00 [KV]  
RstPULL 0.00 [KV]  
UdetL 1.55 [KV]  
UdetK 0.00 [KV]  
UdetI 2.00 [KV]  
REPHZ 1.00 [Hz]  
ATTEN 1.00 [dB]  
M1 207732.546  
M2 195.872  
M3 0.000  
HITURBO no  
GDEON Yes  
CEDLY shore  
DEFION no  
L1MSRD no  
L2MSRD no  
U1S2RID no  
DPCAL1 516.84  
DPMAS 200.00 [Da]  
RENOVAL 0.33  
LENOVAL 0.24  
SBRNOV 0  
CMTZ PolPnR12E2 71  
CMTZ altLn31, 100 shore

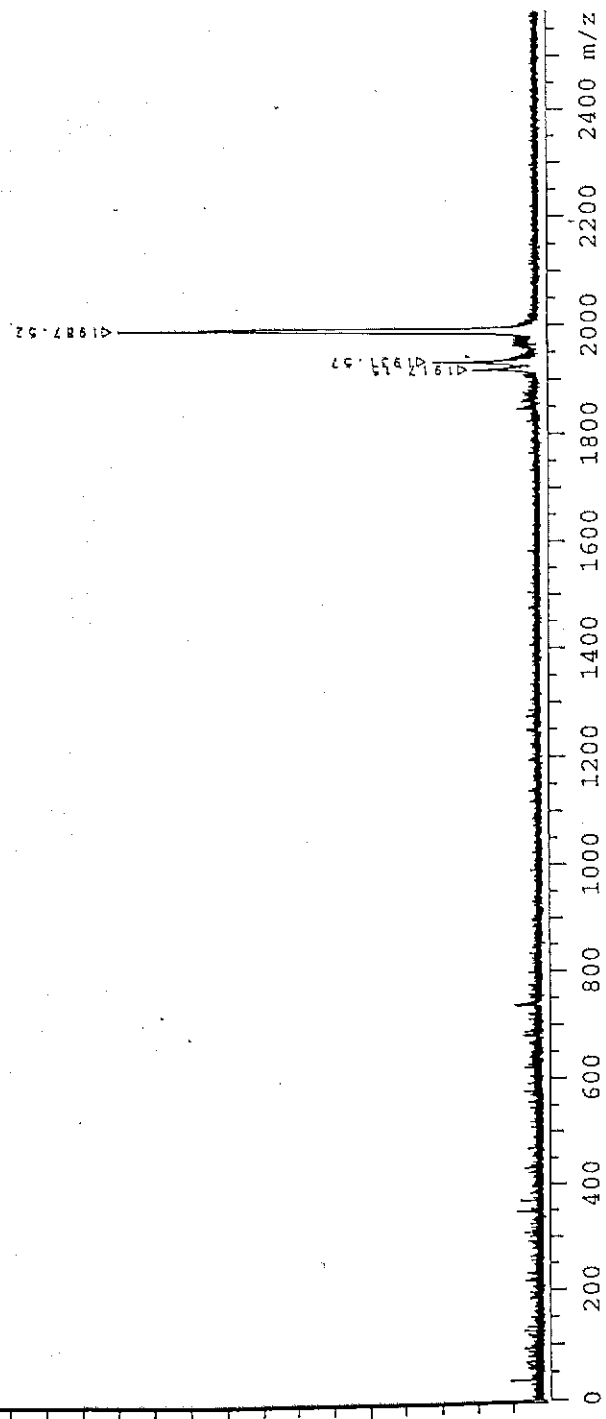

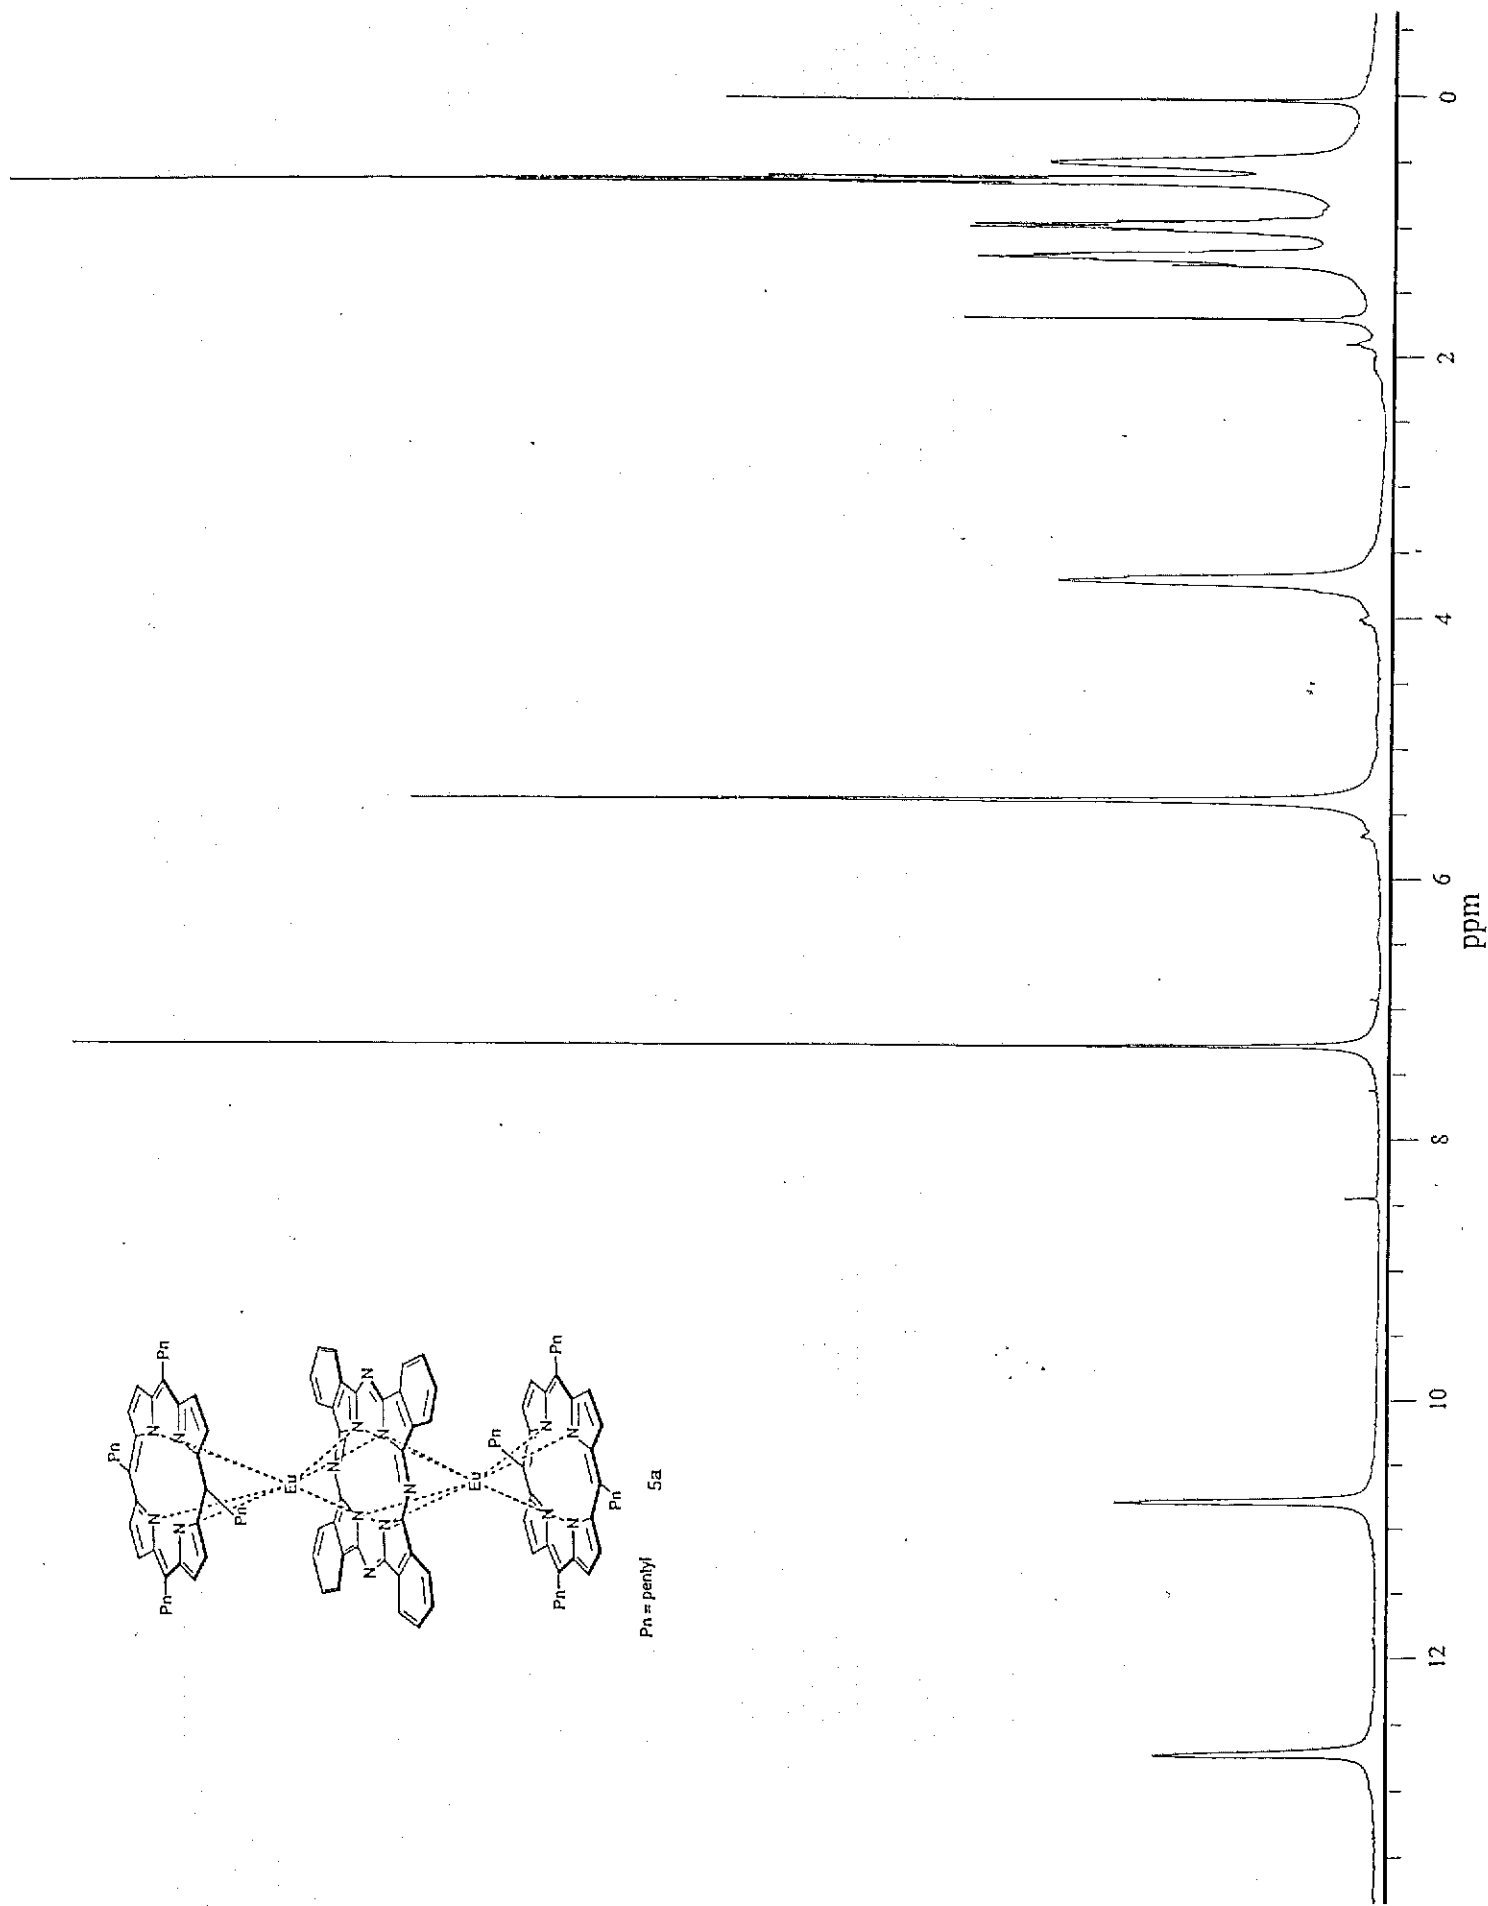

Method file :                      <untitled>  
 Information :                      Default Method  
 Data File :                        C:\HPCHEM\1\DATA\JUNZHONG\PC2PNPEU.SD                      Created  
                                          : 8/16/00 11:49:19

Overlaid Spectra:

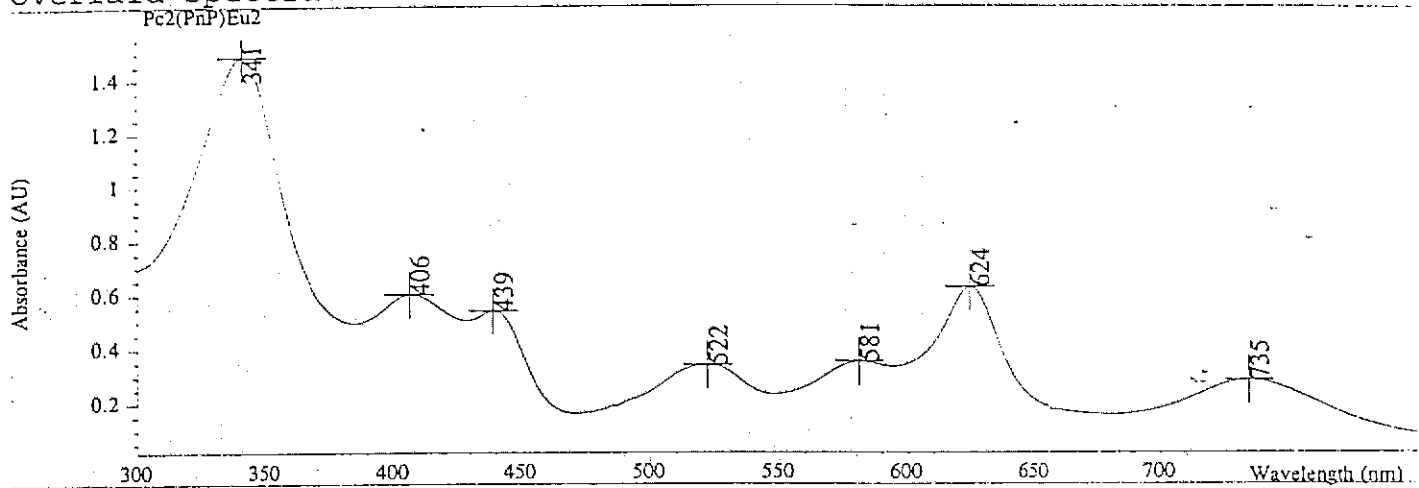

| # | Name          | Peaks (nm) | Abs (AU) |
|---|---------------|------------|----------|
| 1 | Pc2 (PnP) Eu2 | 341.0      | 1.48890  |
| 1 |               | 624.0      | 0.63059  |
| 1 |               | 406.0      | 0.60415  |
| 1 |               | 439.0      | 0.54307  |
| 1 |               | 581.0      | 0.35733  |
| 1 |               | 522.0      | 0.34337  |
| 1 |               | 735.0      | 0.28699  |

Report generated by :

Signature: .....

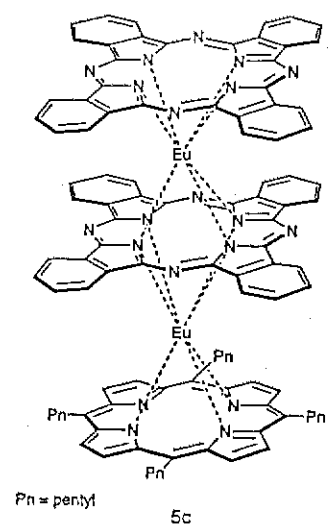



a. i.

1000

900

800

700

600

500

400

300

200

100

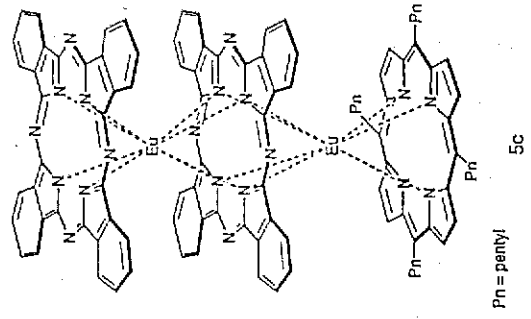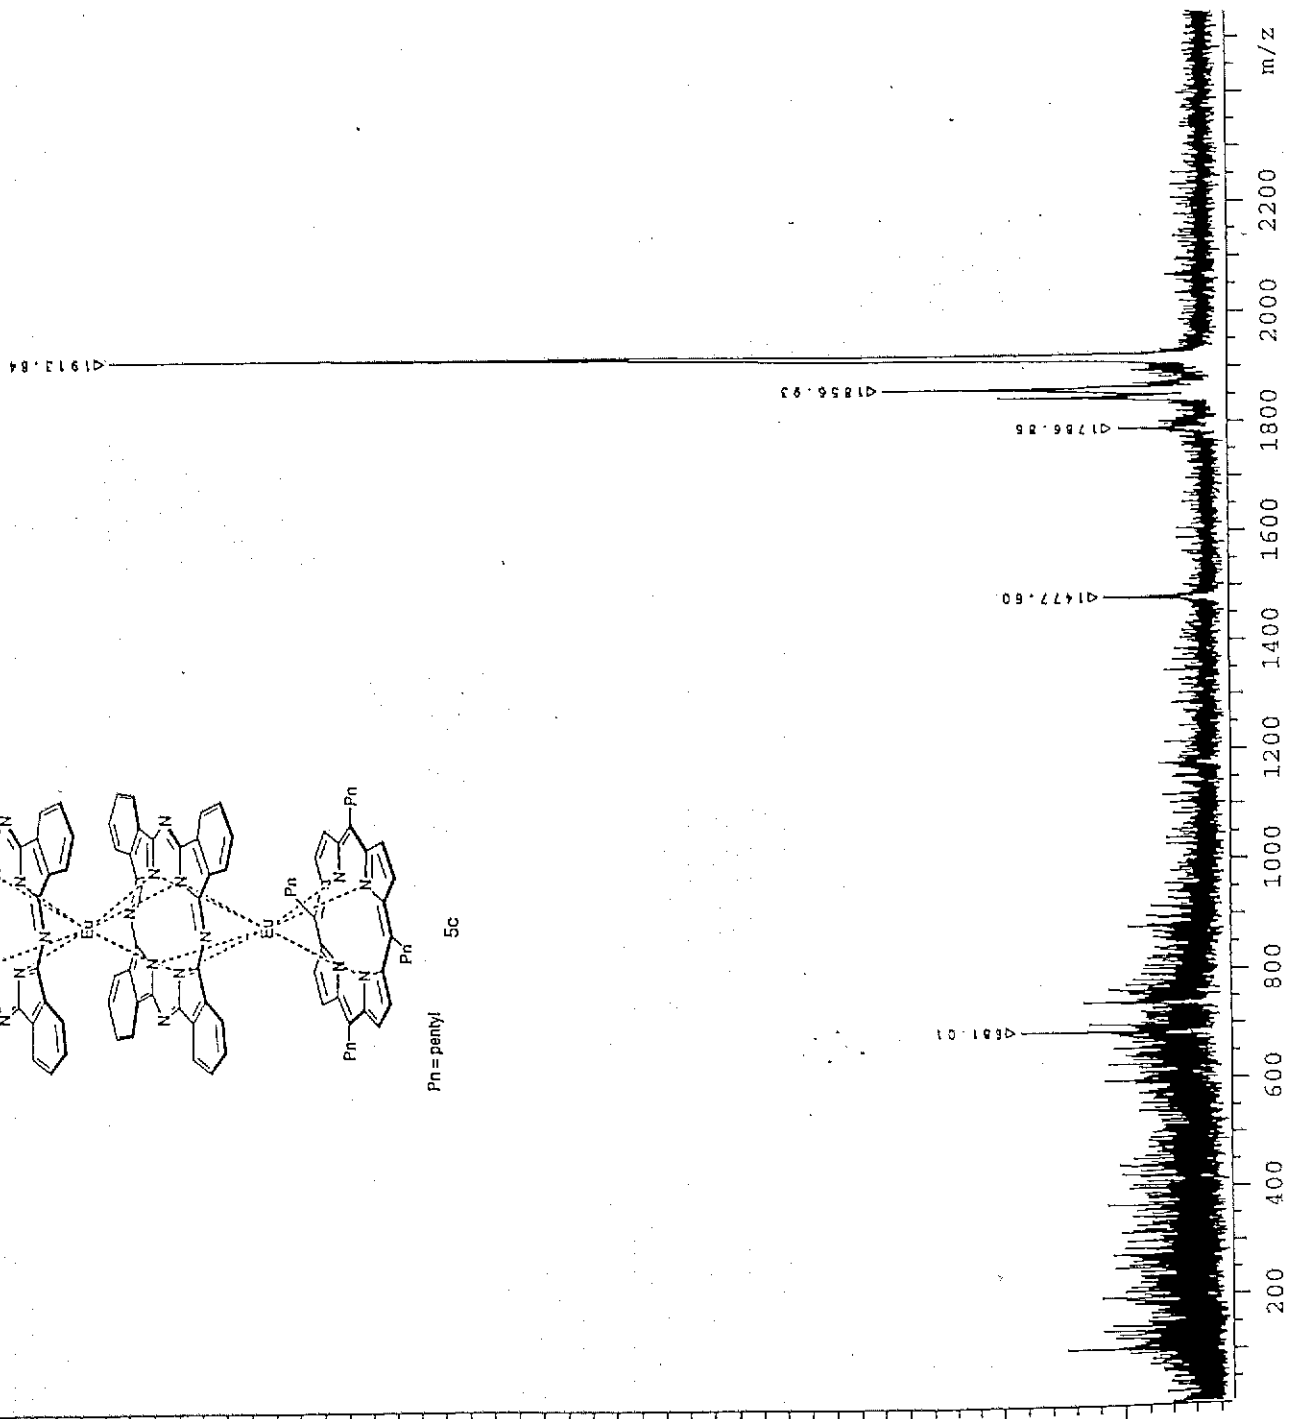

/data/chemistry/LINDSEY/JUNZHONG/003059/1SRef/pdata/1 tof Tue Aug 15 14:47:01 2000

INSTRUM TOF  
OpId Unknown  
SMPRAC 003059  
AQ\_DATE Tue Aug 15 11:24:51 2000  
PATH /data/chemistry/LINDSEY/JUNZHONG  
AcqMn 02  
AcqP\_m Reflecto  
TD 40000  
NoSHOTS 100  
SMORUM 0  
SMPFS1 0  
SMPFS2 0  
SMPFS3 0  
DM 0  
DELAY 1.00 [ns]  
U1s1 20.00 [KV]  
U1s2 18.50 [KV]  
Uref1 0.00 [KV]  
Uens 7.50 [KV]  
Ulimax 10.00 [KV]  
Ustabil 1.55 [KV]  
Udacr 0.00 [KV]  
Udref1 2.00 [KV]  
REPIZ 1.00 [Hz]  
ATTEN 48.0  
ML1 207734.65  
ML2 355.872  
ML3 0.000  
HITURBO no  
CDEUN yes  
CDEDLY short  
DEFLSH no  
KLSRBD no  
U1S2RBD no  
U1S2RBD no  
DPCALI 510.84 [Da]  
DPMASS 200.00 [Da]  
RRNDVAL 0.33  
LBRDVAL 0.28  
LSZBRDV 0.91  
CMT1 Pc2(Pn)Eu2  
CMT2 AtLn48, 100 shots

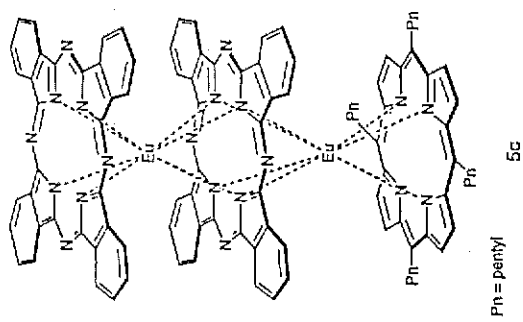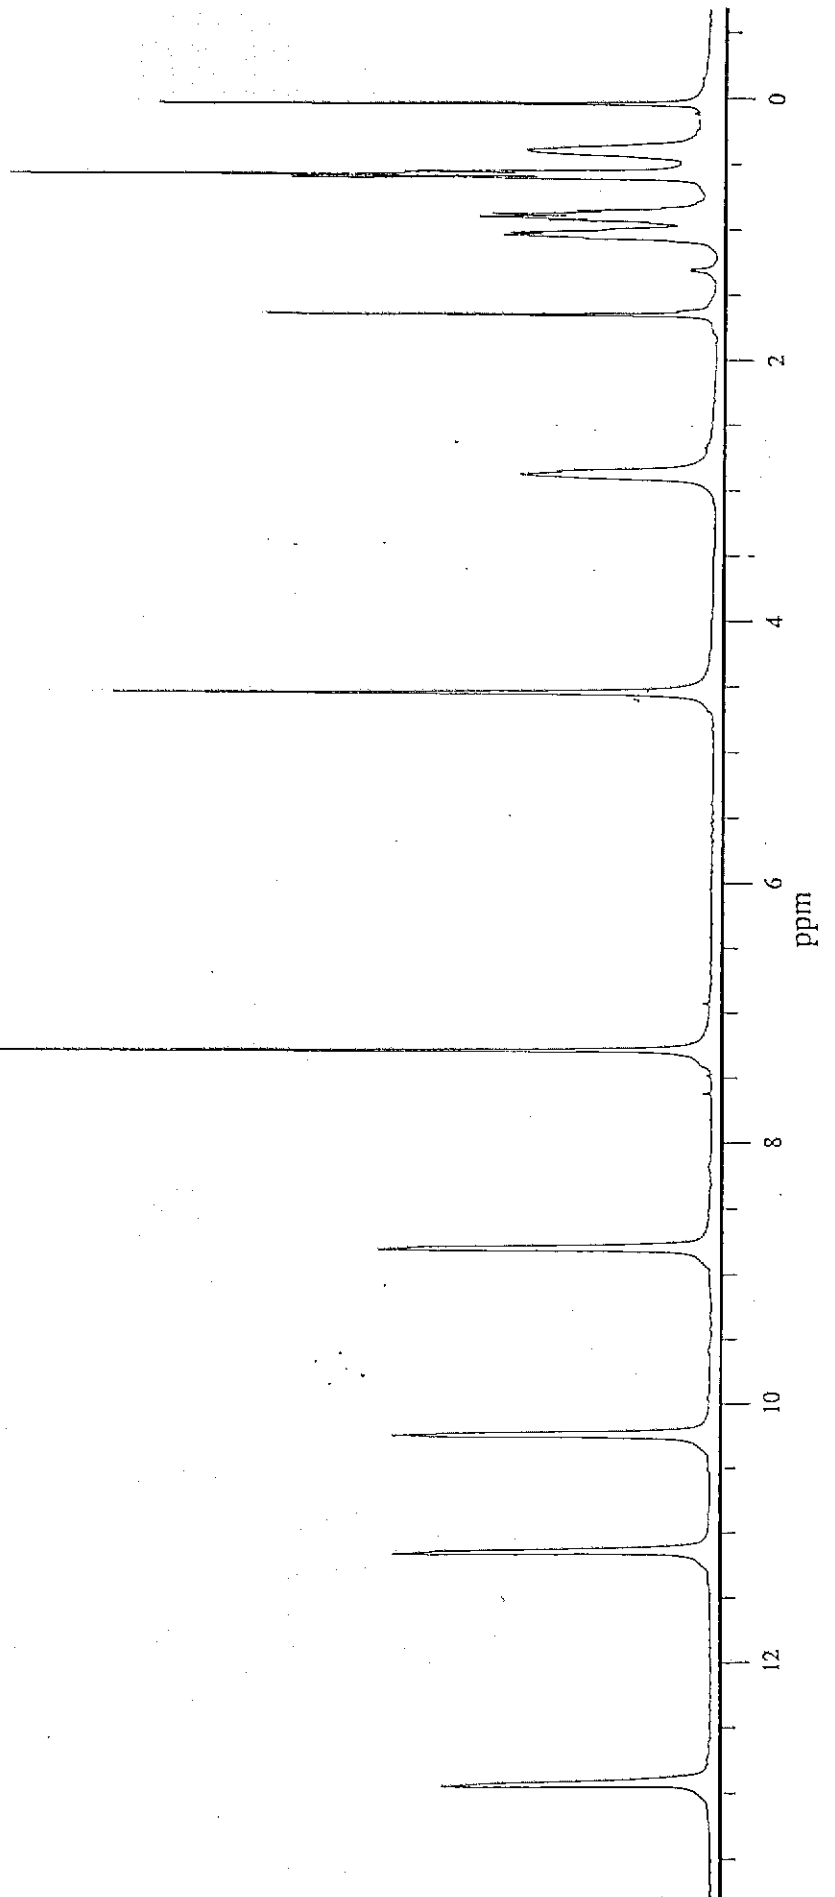

Supplement: b008224o3.pdf [file b008224o3.pdf]
