# Supplementary material for: Studies related to the design and synthesis of a molecular octal counter
Source: Royal Society of Chemistry journal article supplement (doi:10.1039/b008224o), 2001-01-01

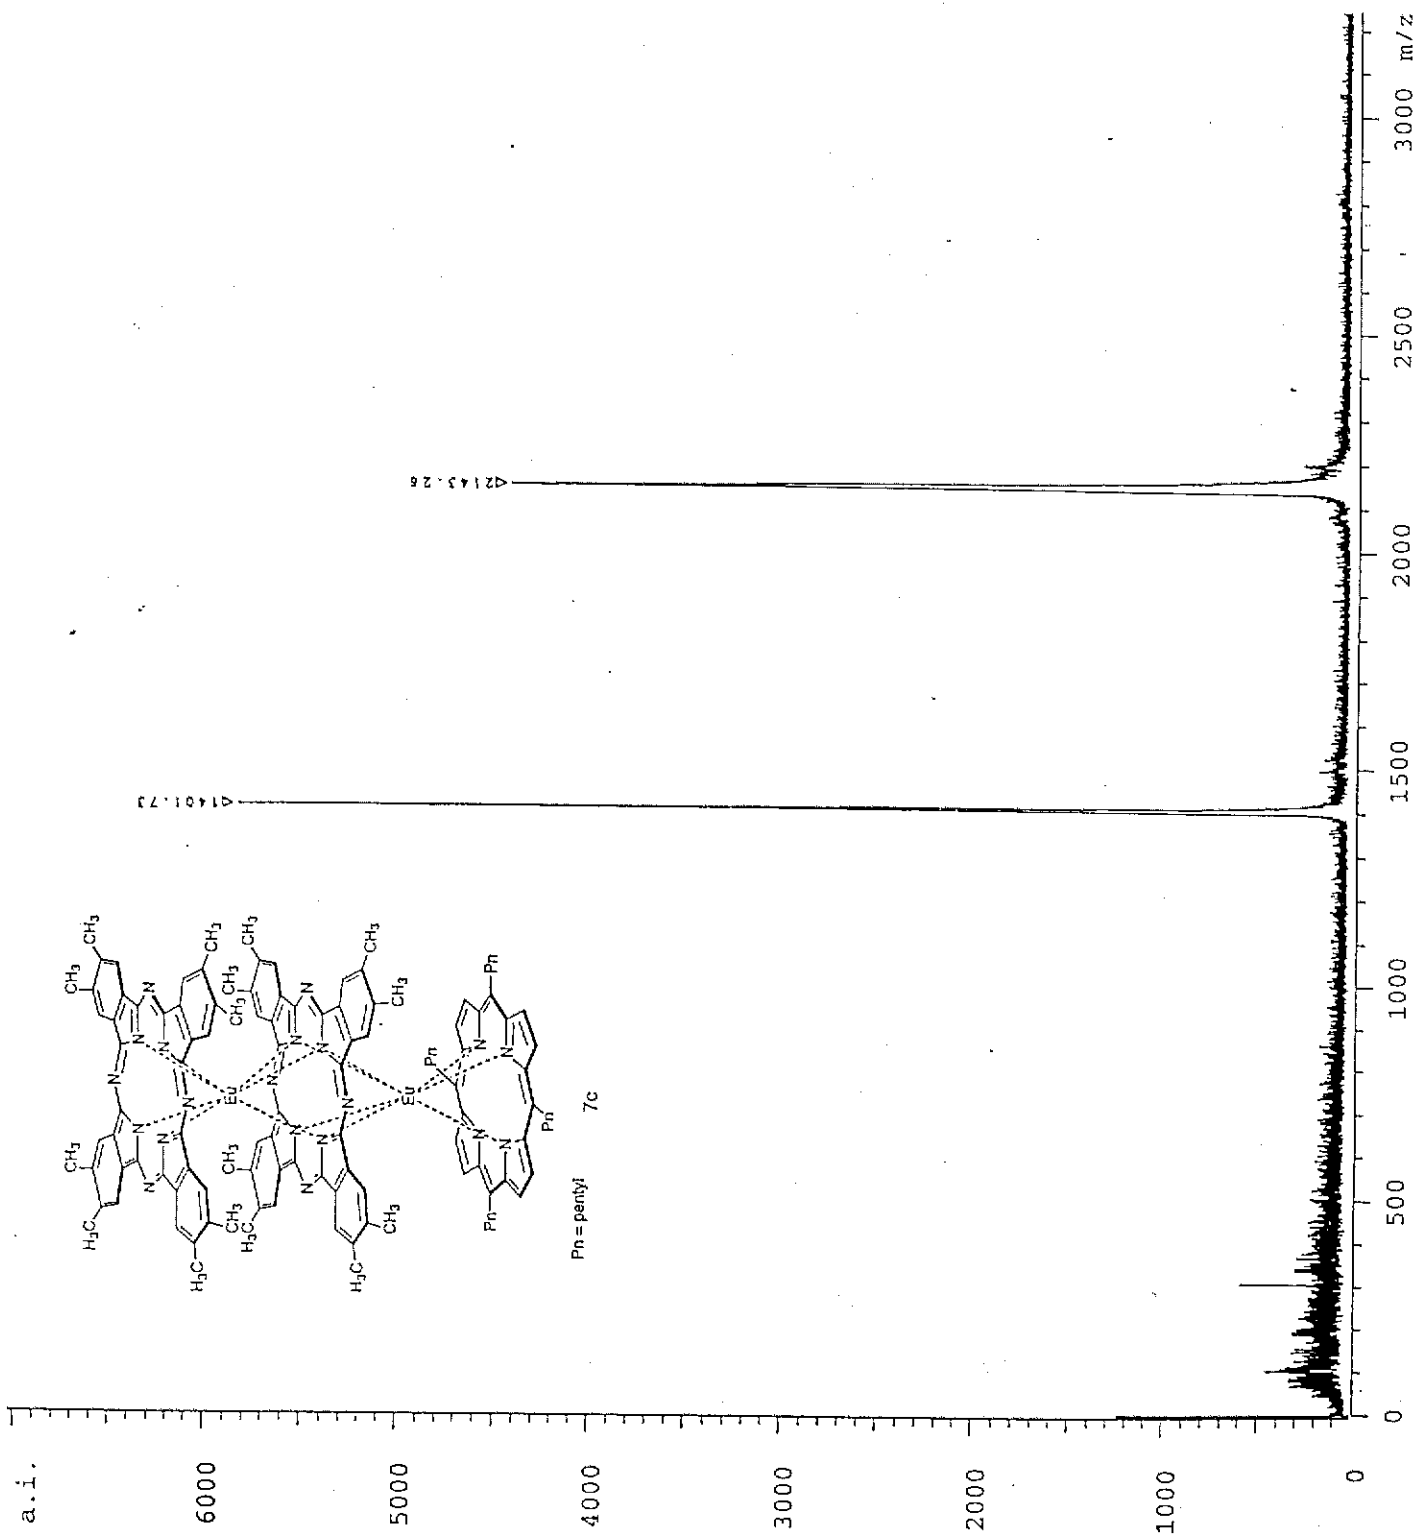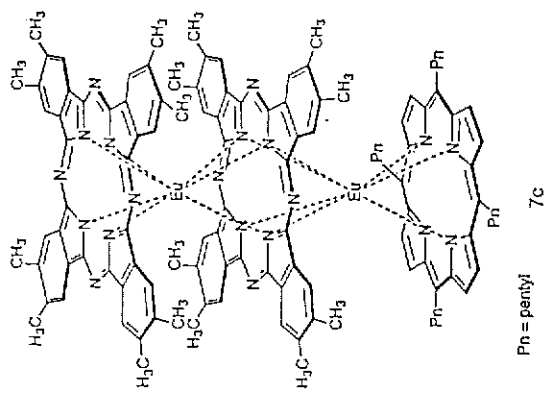

Overlaid Spectra:

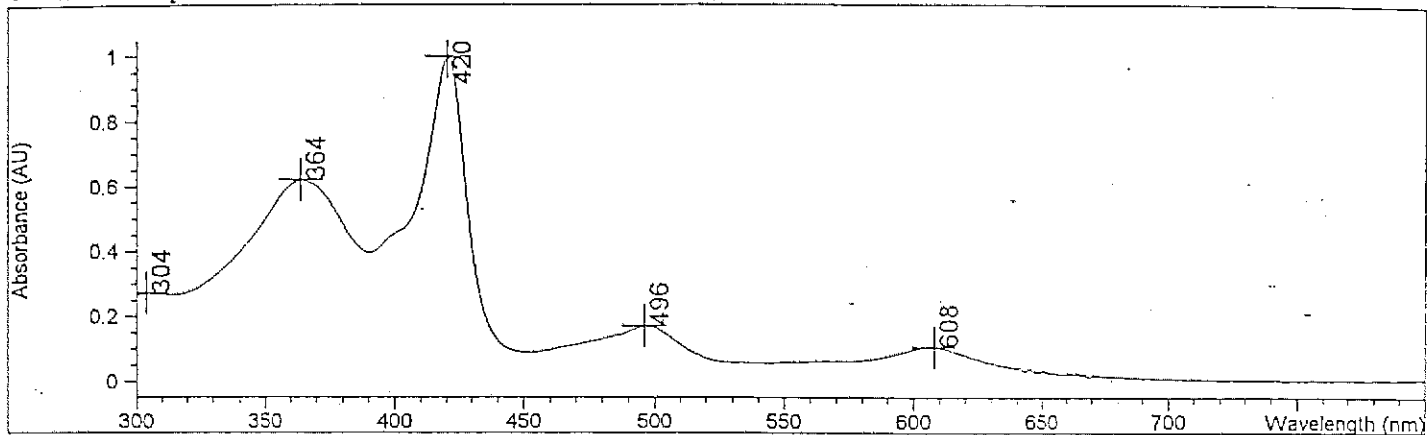

| # | Name | Peaks (nm) | Abs (AU) |
|---|------|------------|----------|
| 1 |      | 420.0      | 0.99883  |
| 1 |      | 364.0      | 0.62047  |
| 1 |      | 304.0      | 0.27356  |
| 1 |      | 496.0      | 0.17084  |
| 1 |      | 608.0      | 0.10686  |

Report generated by :

Signature: .....

\*\*\* End Spectrum/Peak Report \*\*\*

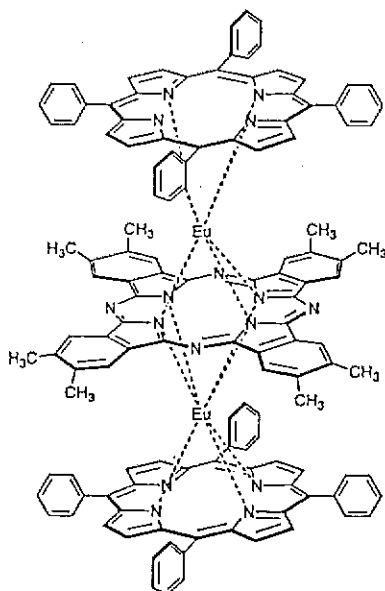

8a

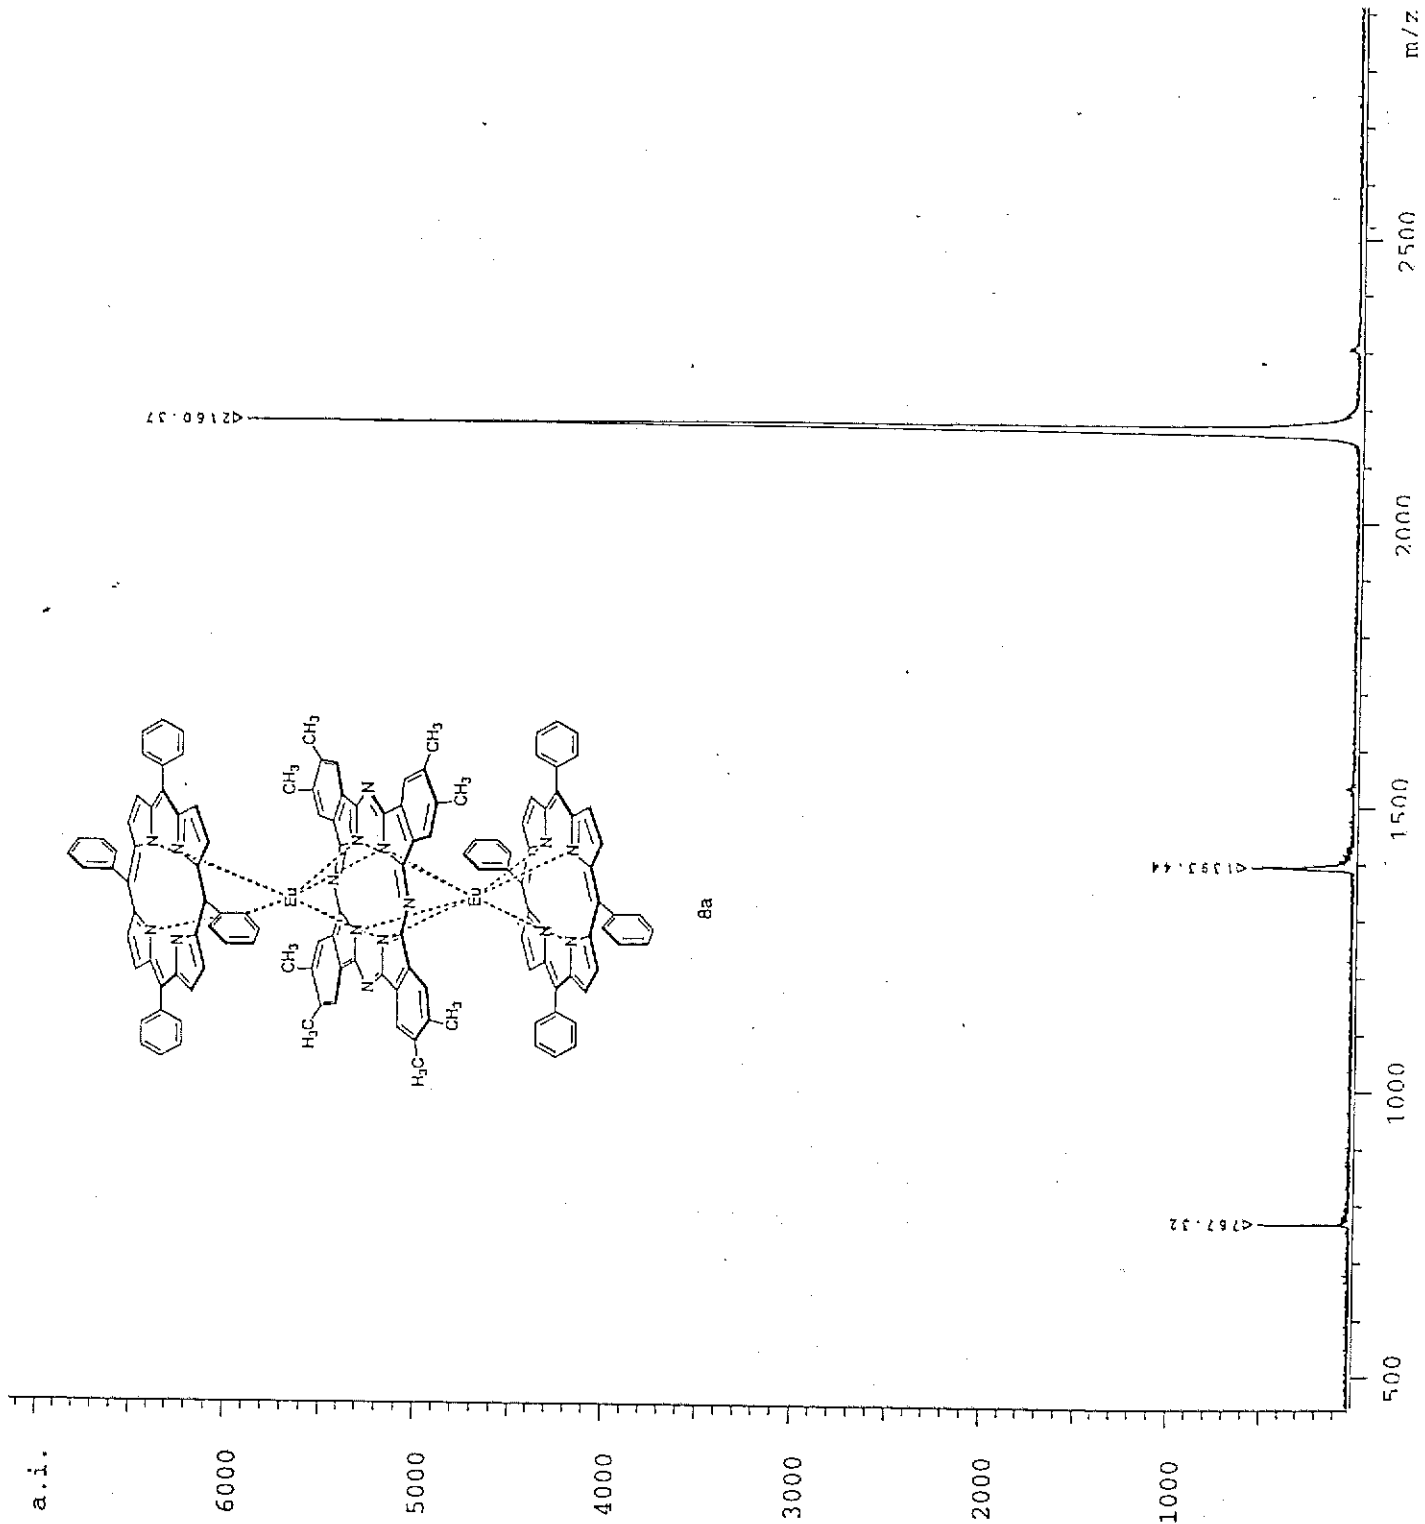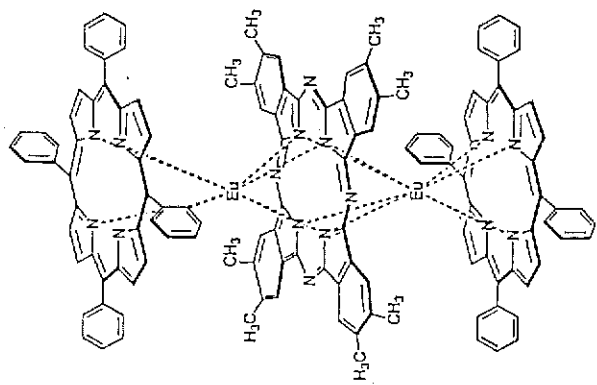

8a

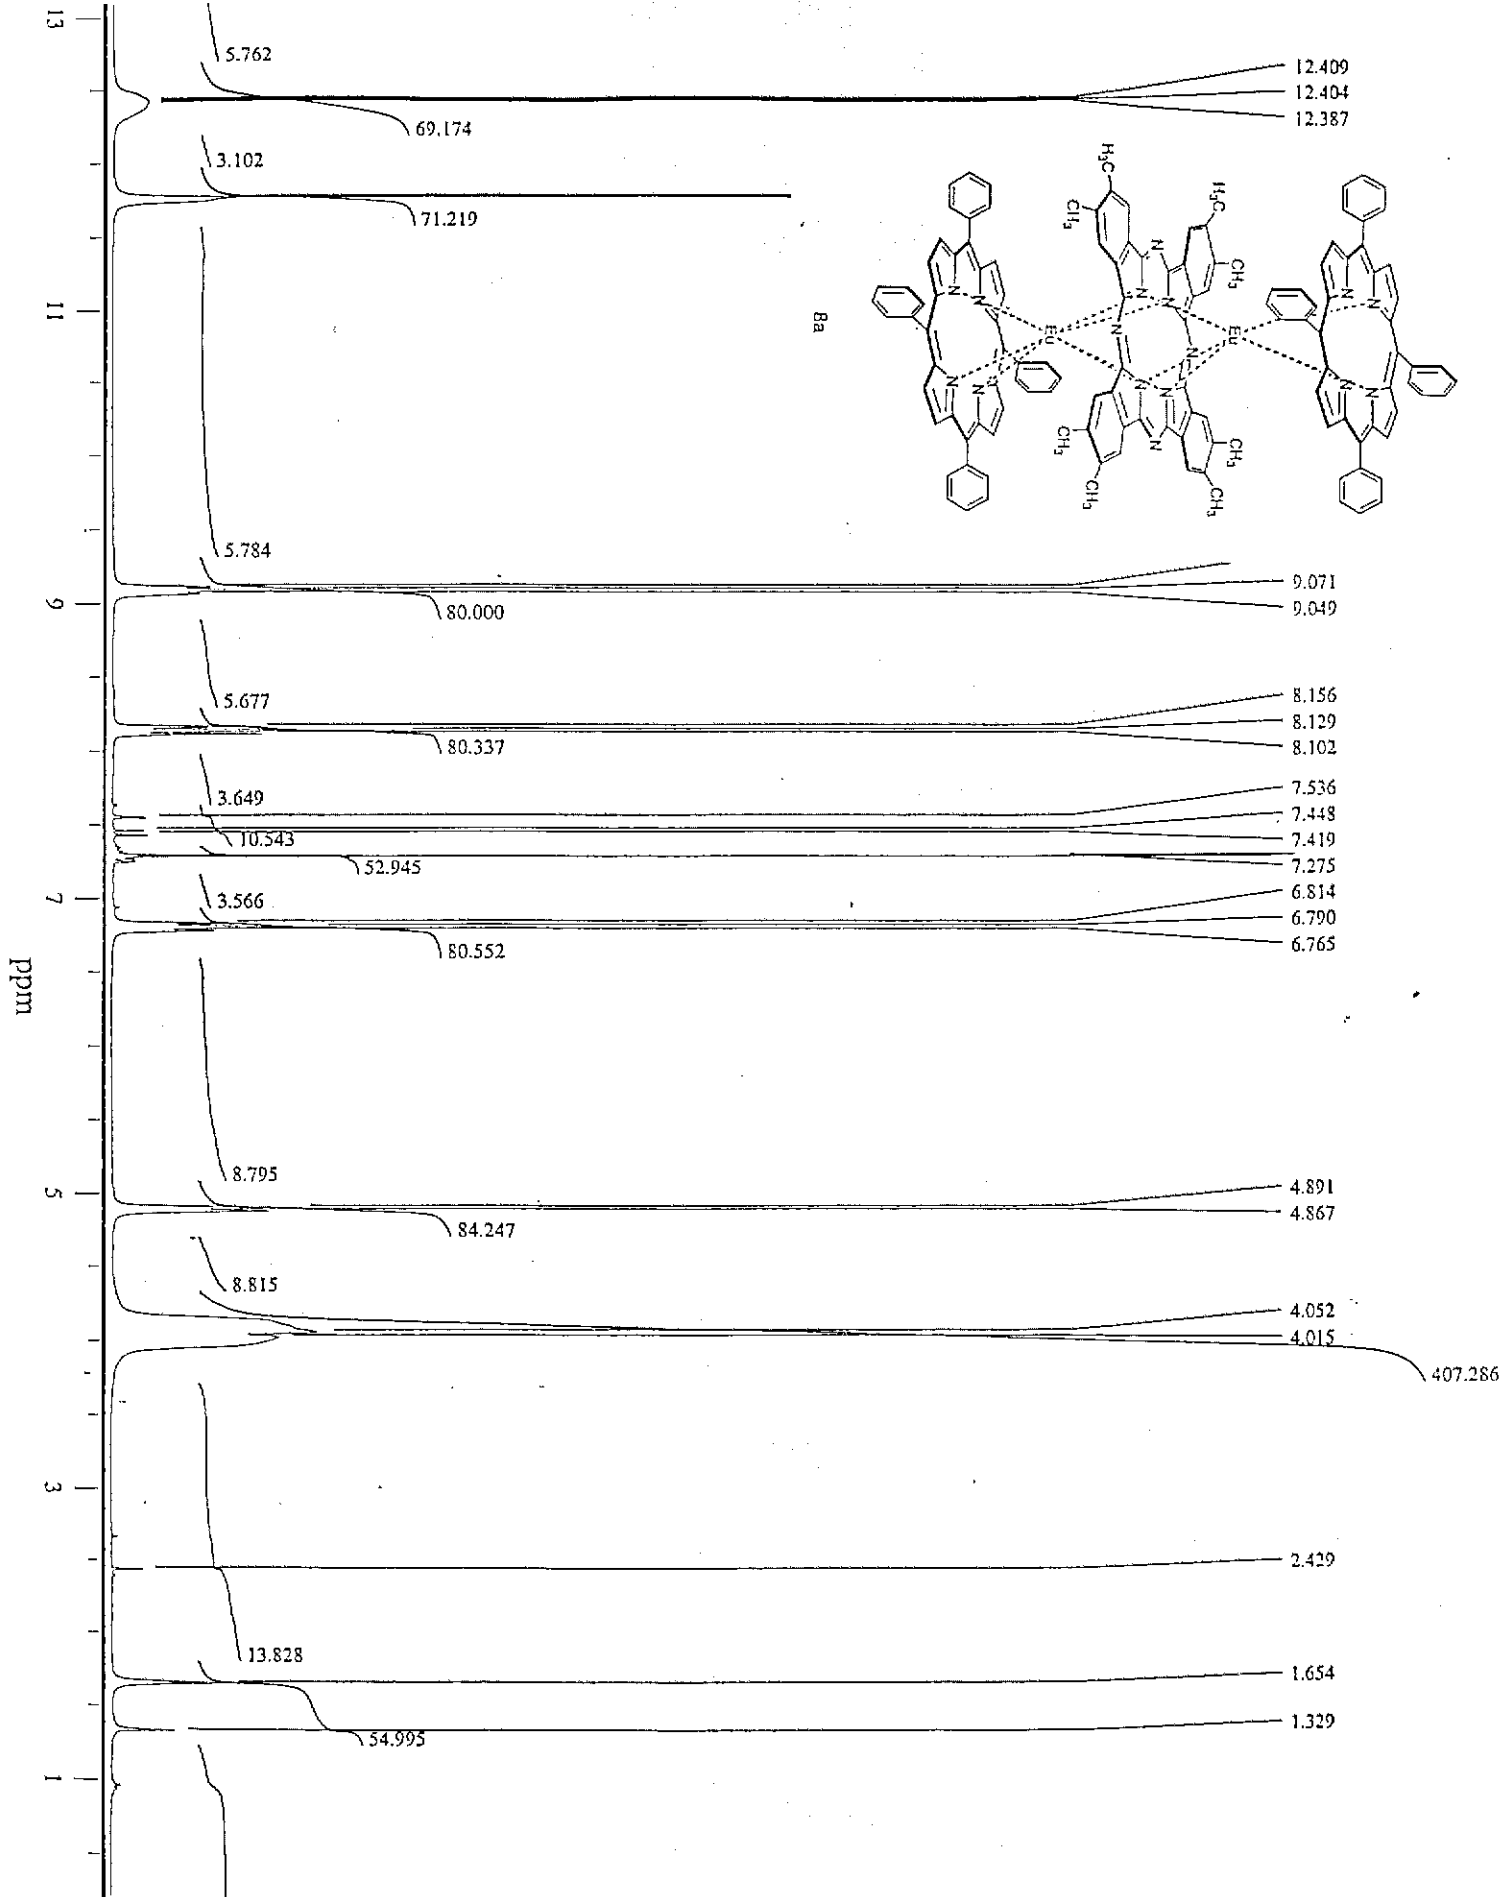

Method file : <untitled>  
Information : Default Method  
Data File : C:\HPCHEM\1\DATA\DOROTKA\381-3SD.SD Created : 4/21/00  
13:36:40

## Overlaid Spectra:

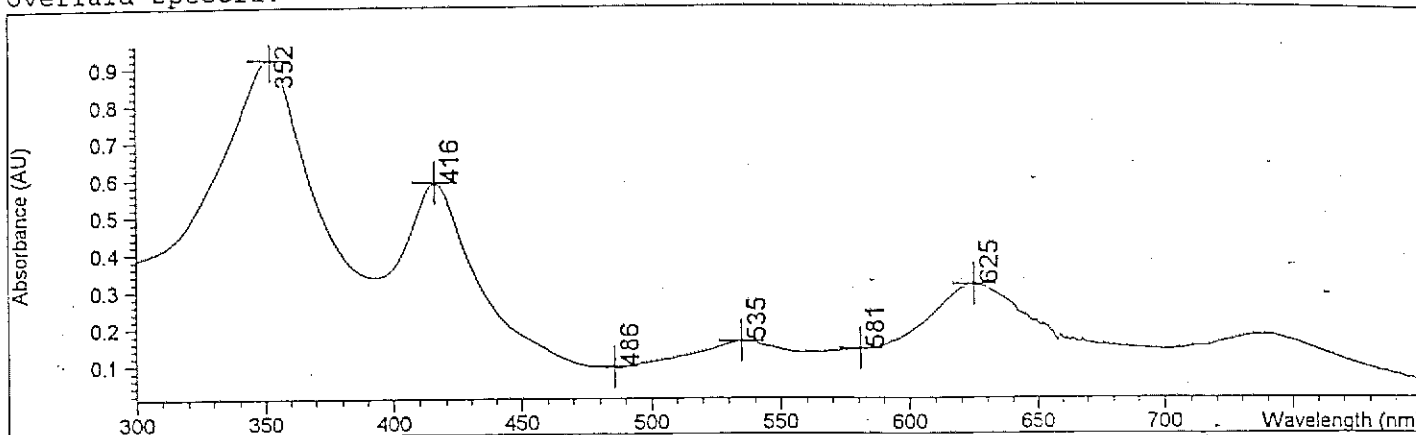

| # | Name | Peaks (nm) | Abs (AU)  |
|---|------|------------|-----------|
| 1 |      | 352.0      | 0.92214   |
| 1 |      | 416.0      | 0.59095   |
| 1 |      | 625.0      | 0.31452   |
| 1 |      | 535.0      | 0.16337   |
| 1 |      | 581.0      | 0.14220   |
| 1 |      | 486.0      | 9.5317E-2 |
| 1 |      | ***        | ***       |

Report generated by :

Signature: .....

\*\*\* End Spectrum/Peak Report \*\*\*

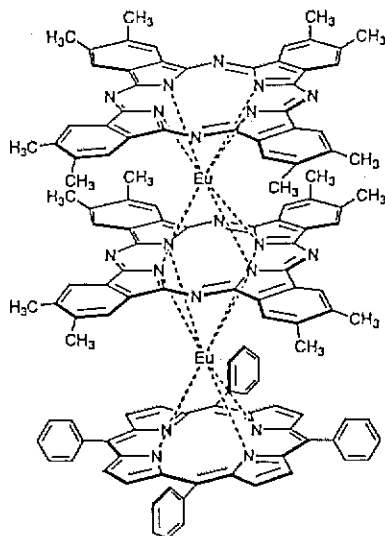

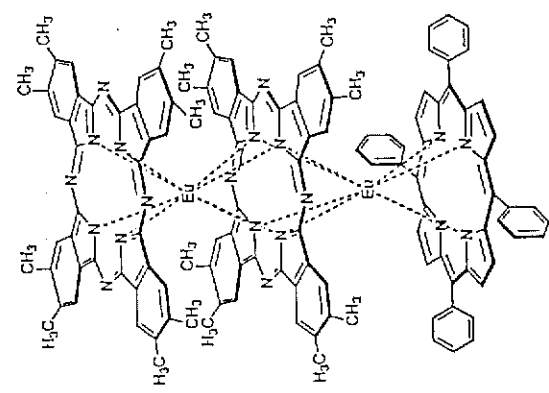

8c

INSTRUM TOP  
 OpId H. Srinivasan  
 SMPNAM 001098  
 AQ\_DATE Mon Apr 24 13:23:52 2000  
 PATH1 /data/chemistry/LINDSEY/DOROTA  
 PATH2 /data/chemistry/LINDSEY/DOROTA  
 ACQPRN Reflector  
 TO 40000  
 RESHOTS 150  
 SNGRDM 0  
 SHOPTS1 0  
 SHOPTS2 0  
 SHOPTS3 0  
 EM 0  
 DELAY 0 [ns]  
 U1s1 20.00 [KV]  
 U1s2 18.70 [KV]  
 U1s3 0.00 [KV]  
 U1s4 7.50 [KV]  
 U1s5 8.00 [KV]  
 U1s6 8.00 [KV]  
 U1s7 1.50 [KV]  
 U1s8 0.00 [KV]  
 U1s9 2.00 [KV]  
 REPHZ 1.00 [Hz]  
 ATTEN 50.0  
 HL1 2067135.193  
 HL2 313.82  
 HL3 0.000  
 HITURRO no  
 GDEON yes  
 CDEELY short  
 DEFION no  
 RLSBRD no  
 U1S2BRD no  
 U1S3BRD no  
 DPKCAL1 510.84 [Da]  
 DPKCAL2 700.00 [Da]  
 RRNOVAL 0.33  
 LRNOVAL 0.28  
 ISZBRDV 0.91  
 CMT1 UC-181-f1  
 CMT2 atten=52, shots=100, no matrix

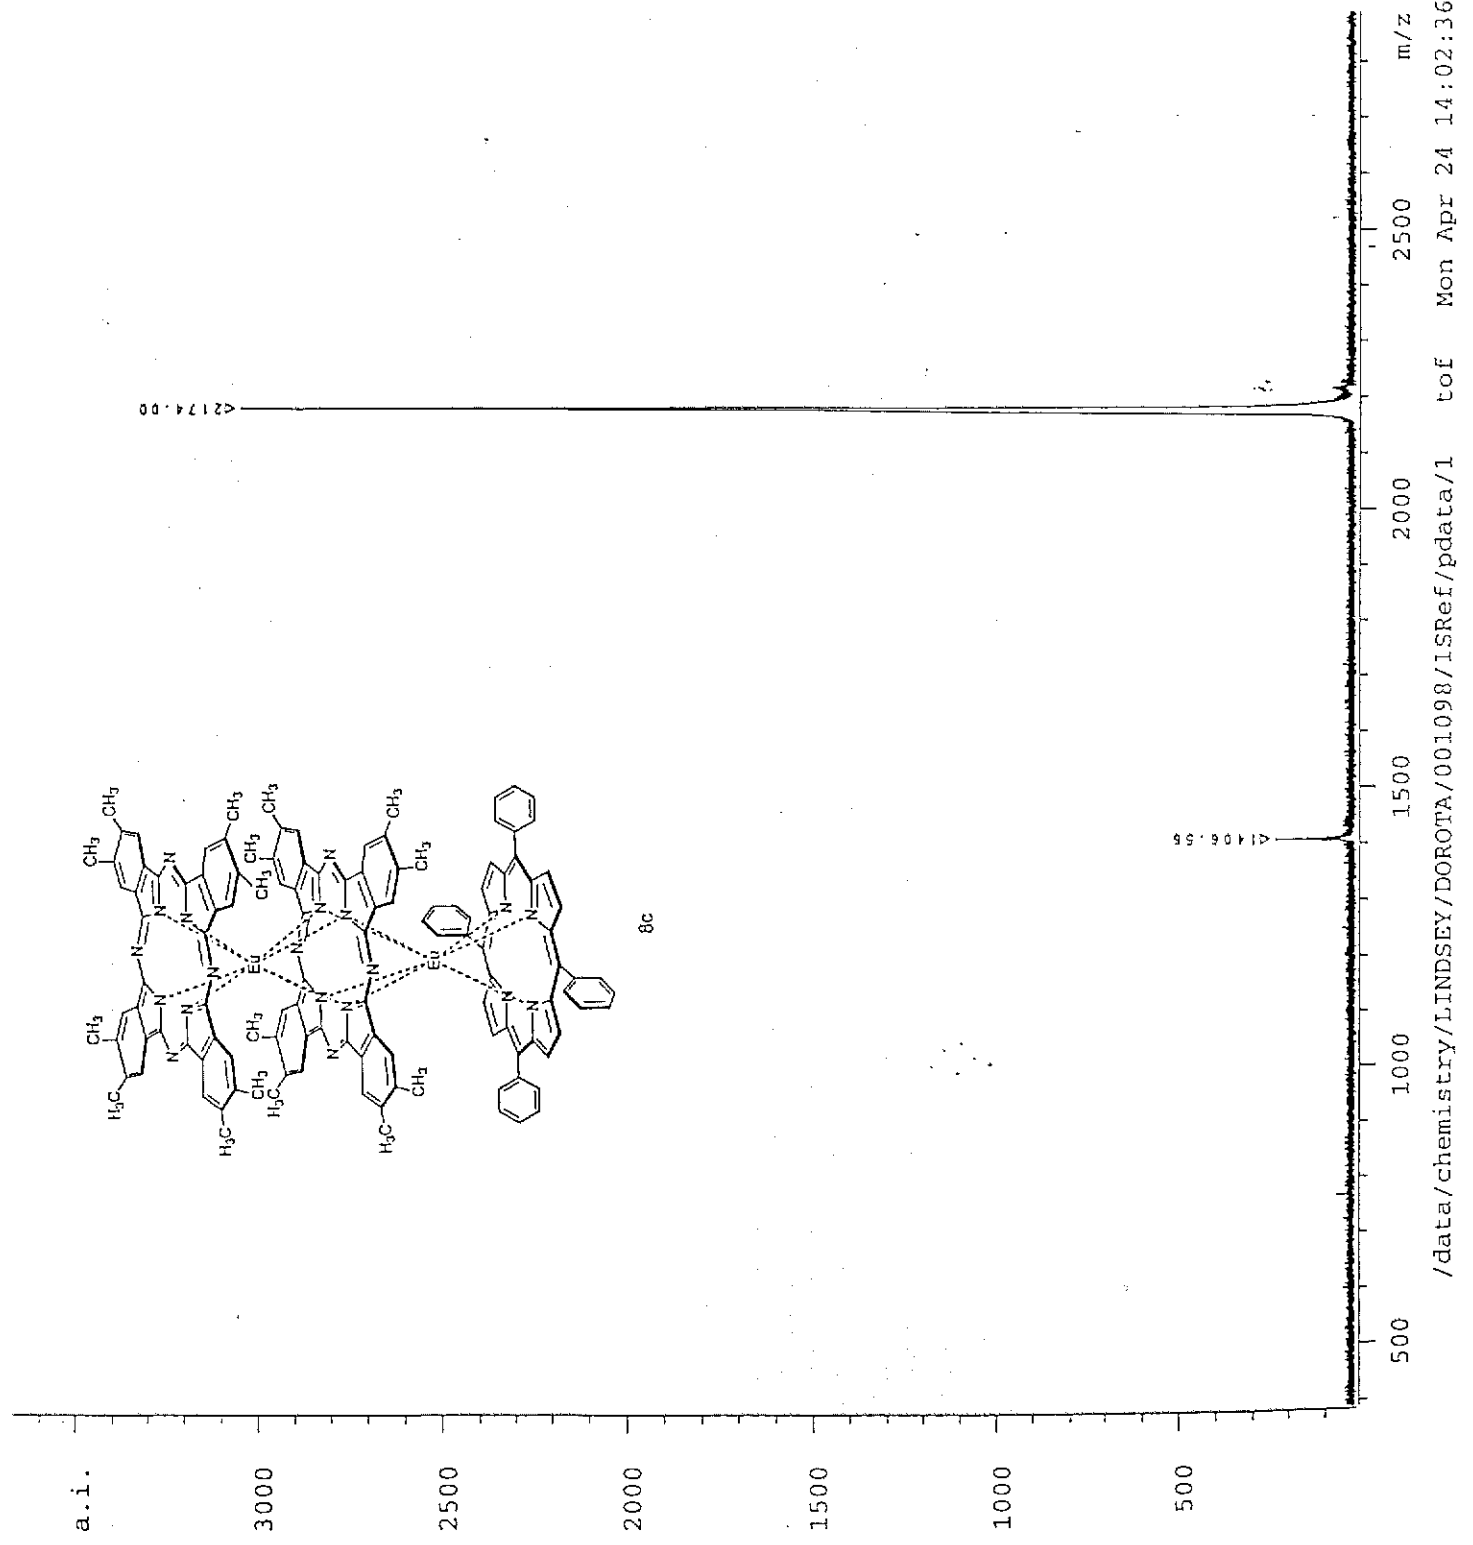

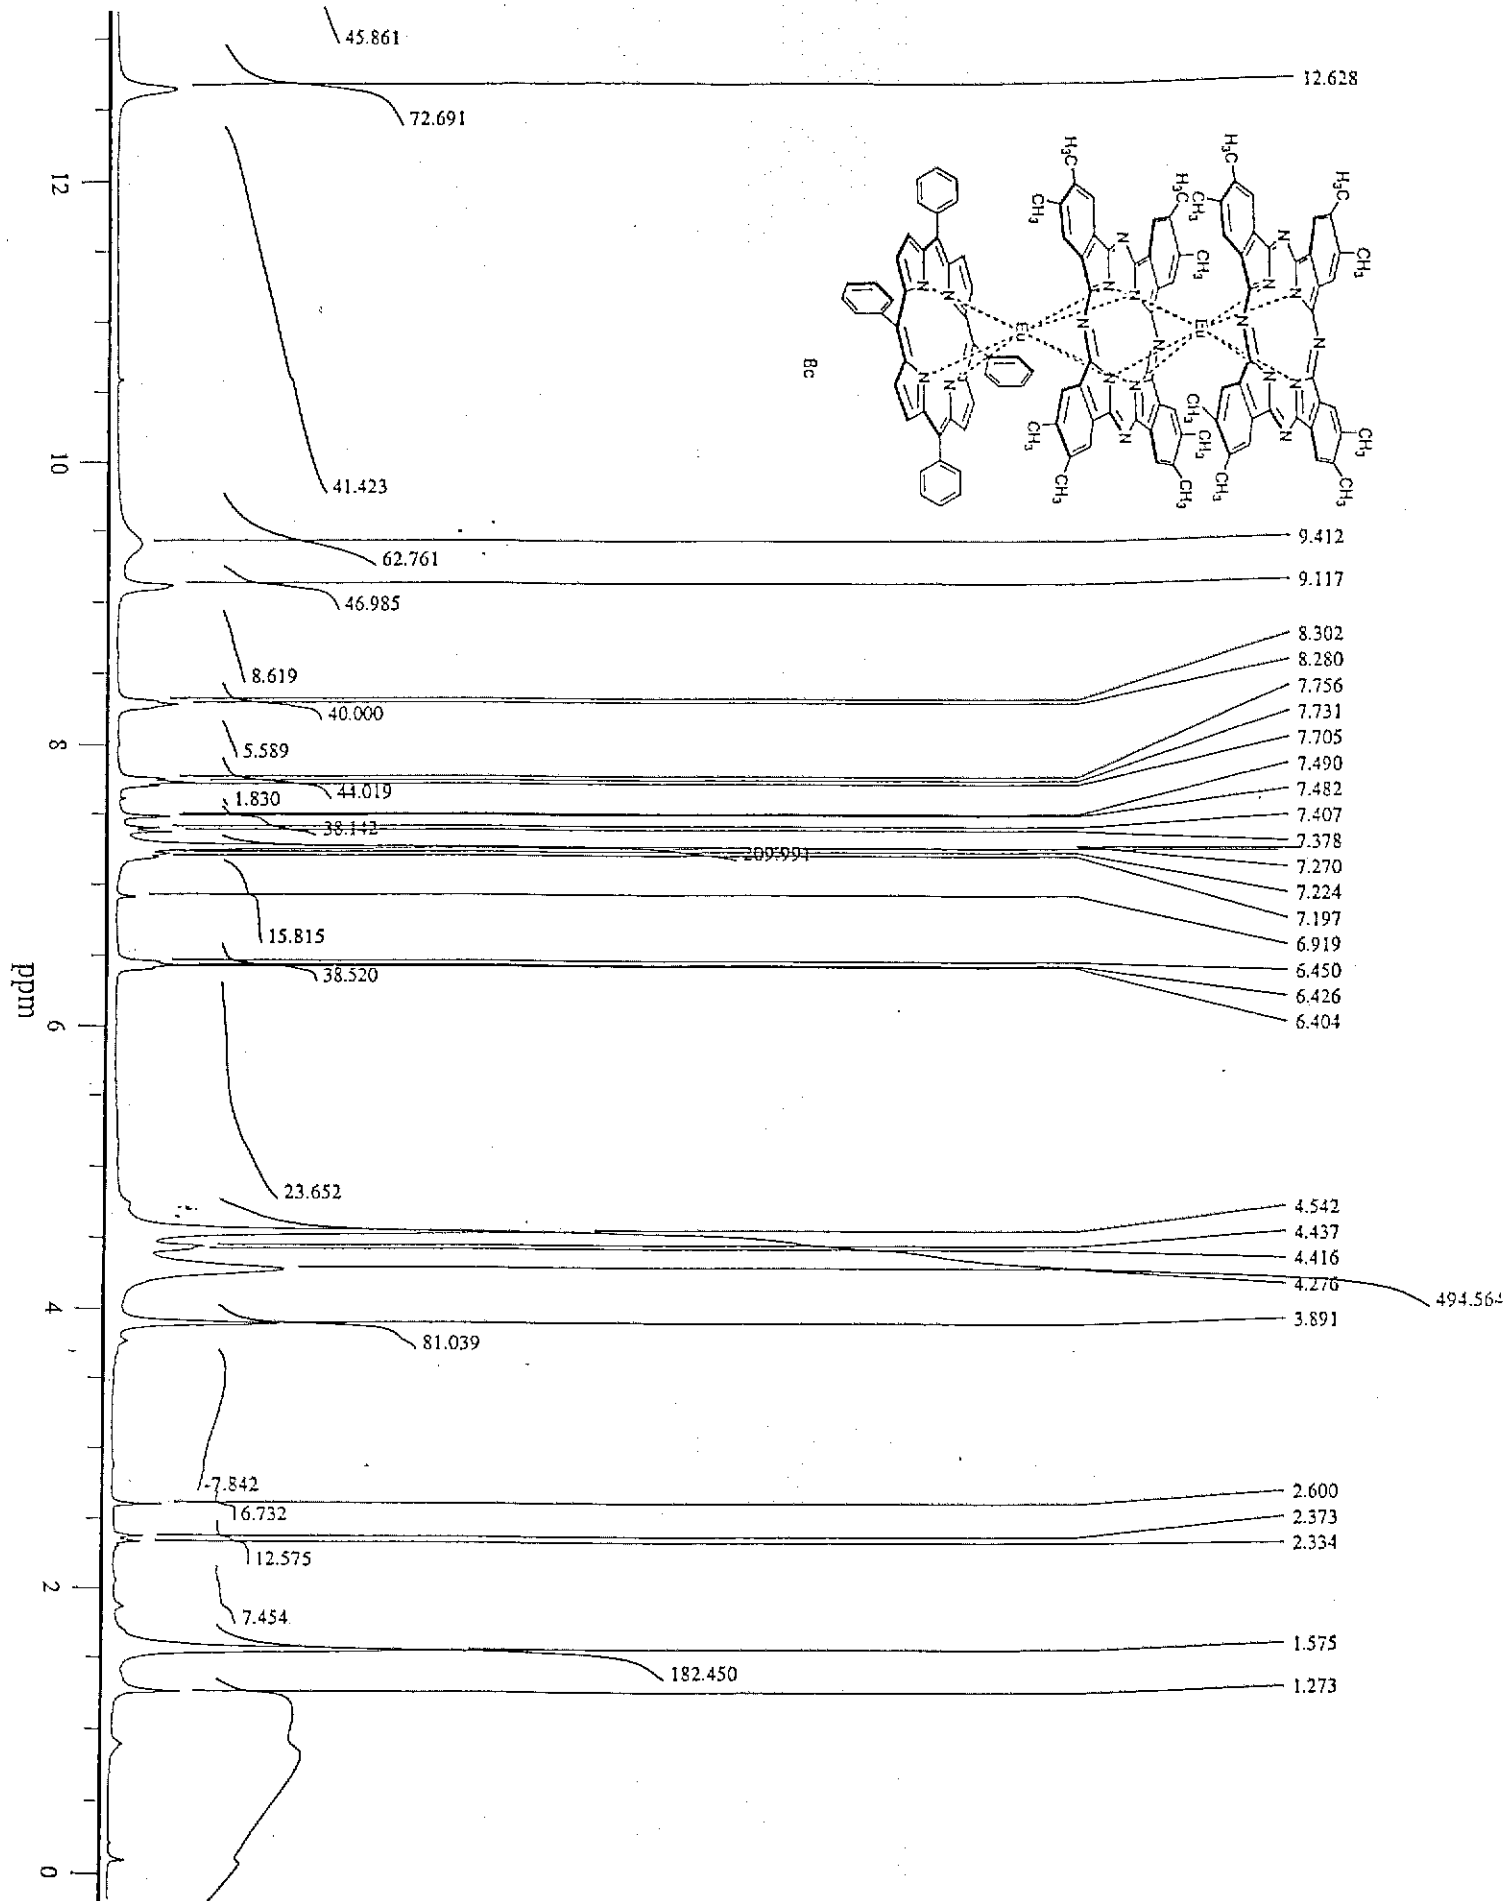

Overlaid Spectra:

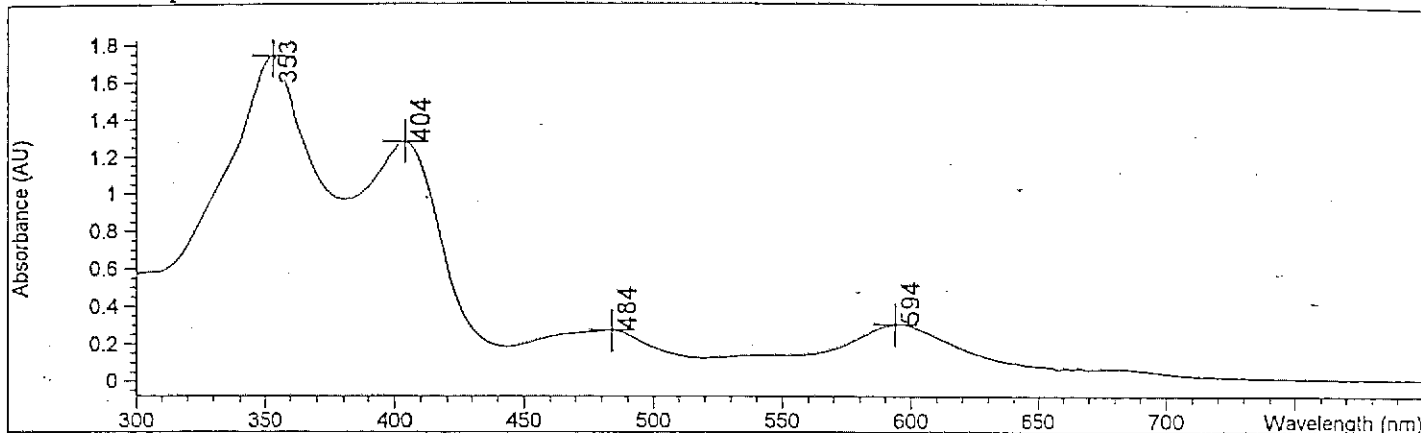

| # | Name | Peaks (nm) | Abs (AU) |
|---|------|------------|----------|
| 1 |      | 353.0      | 1.73980  |
| 1 |      | 404.0      | 1.28150  |
| 1 |      | 594.0      | 0.30435  |
| 1 |      | 484.0      | 0.27358  |
| 1 |      | ***        | ***      |

Report generated by :

Signature: .....

\*\*\* End Spectrum/Peak Report \*\*\*

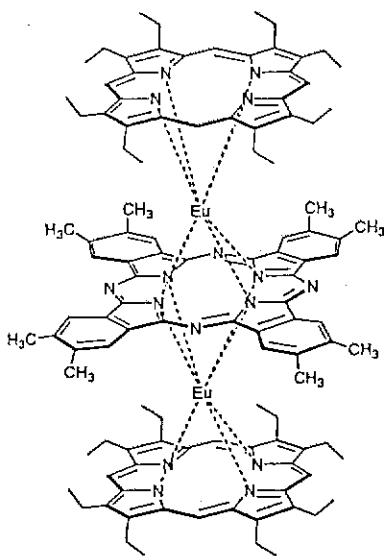



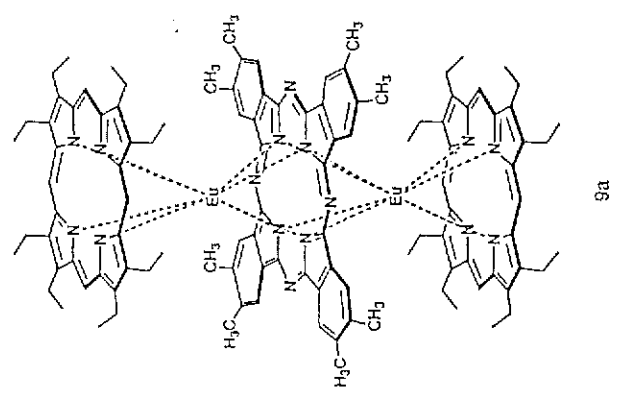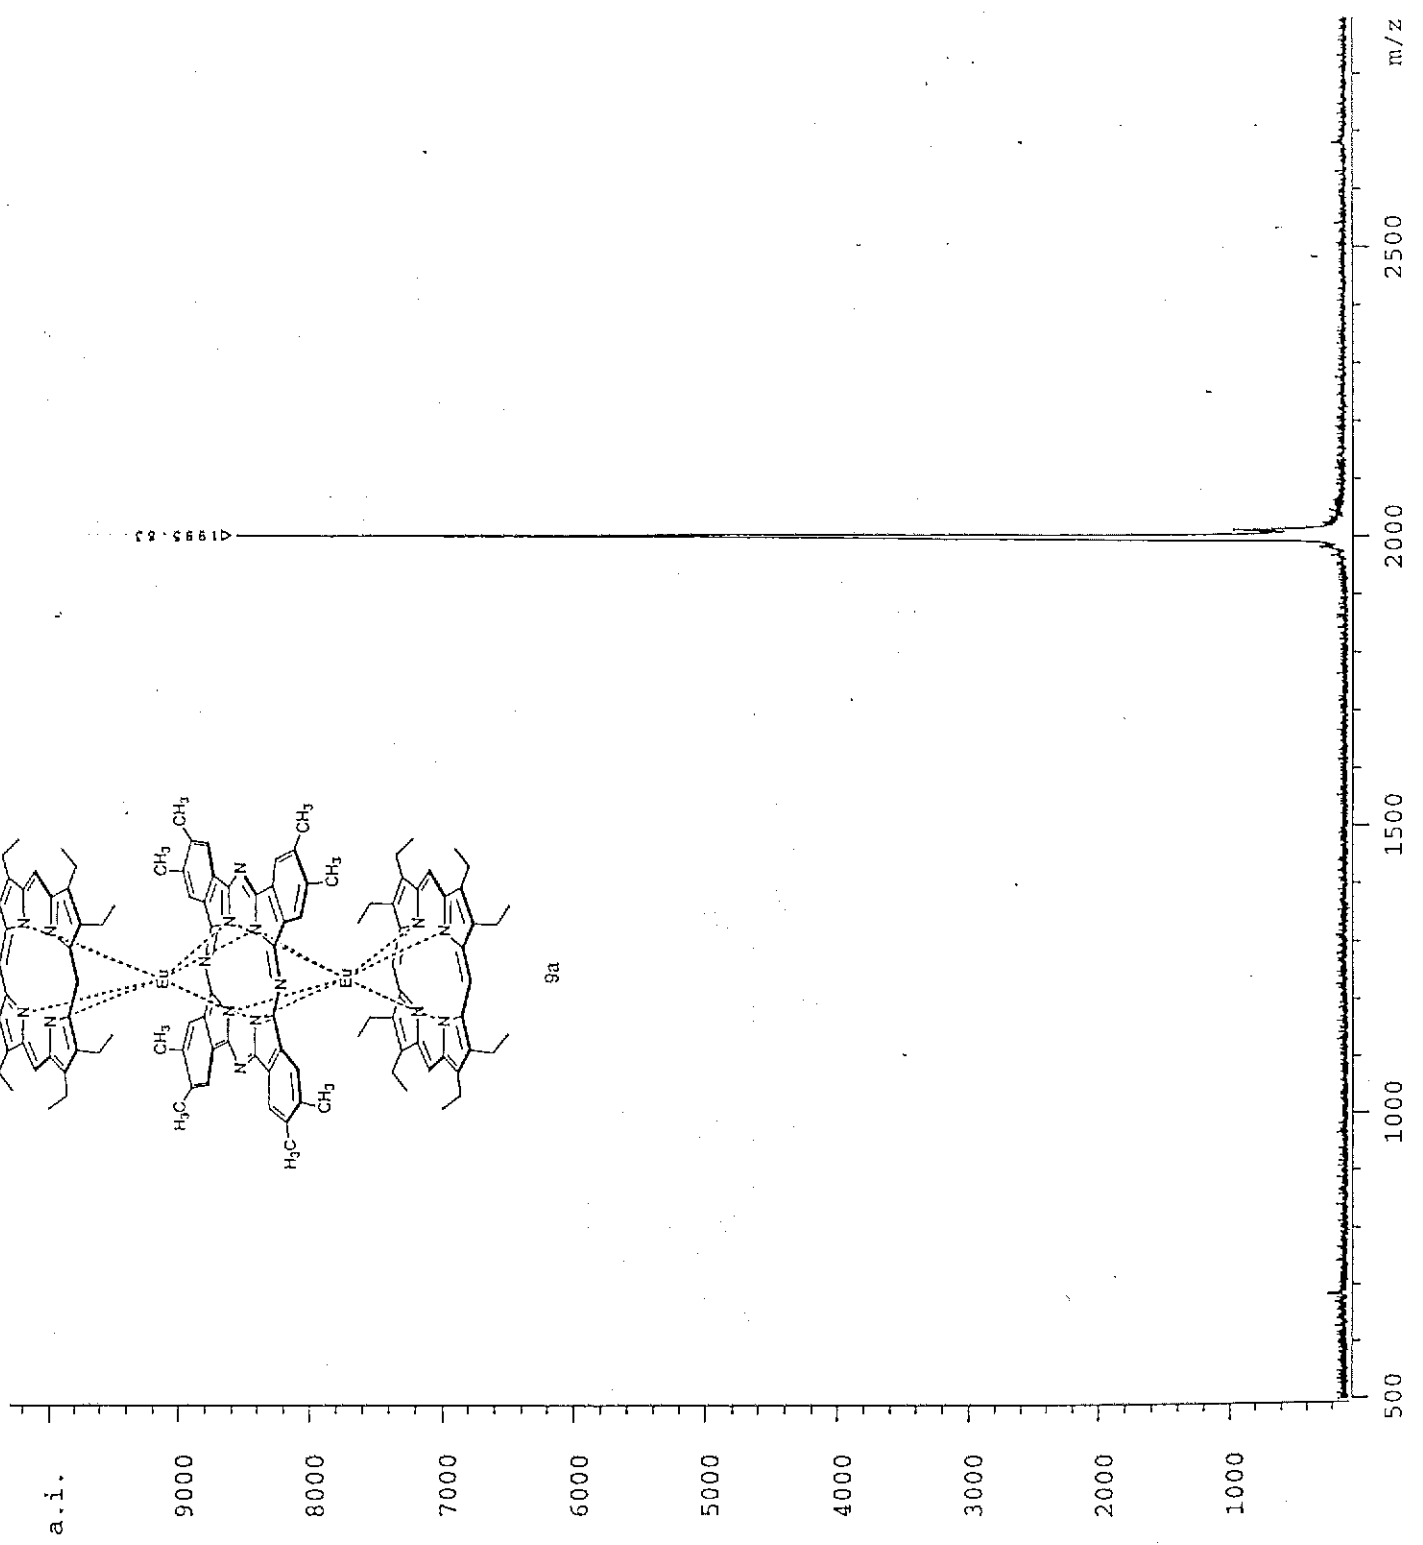

Overlaid Spectra:

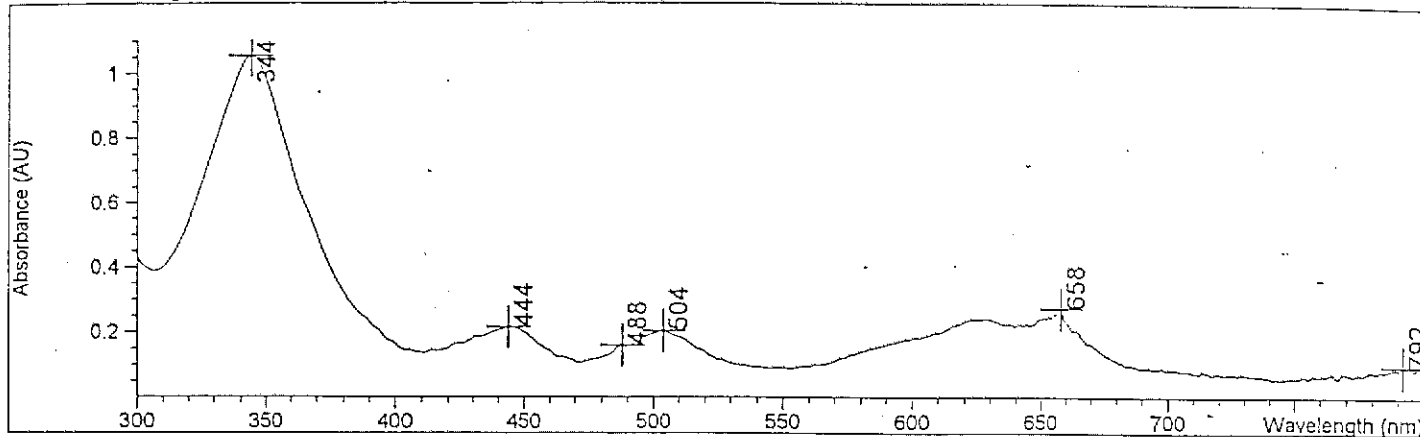

| # | Name | Peaks (nm) | Abs (AU)  |
|---|------|------------|-----------|
| 1 |      | 344.0      | 1.05490   |
| 1 |      | 658.0      | 0.27283   |
| 1 |      | 444.0      | 0.21551   |
| 1 |      | 504.0      | 0.20467   |
| 1 |      | 488.0      | 0.16000   |
| 1 |      | 792.0      | 9.5830E-2 |

Report generated by :

Signature: .....

\*\*\* End Spectrum/Peak Report \*\*\*

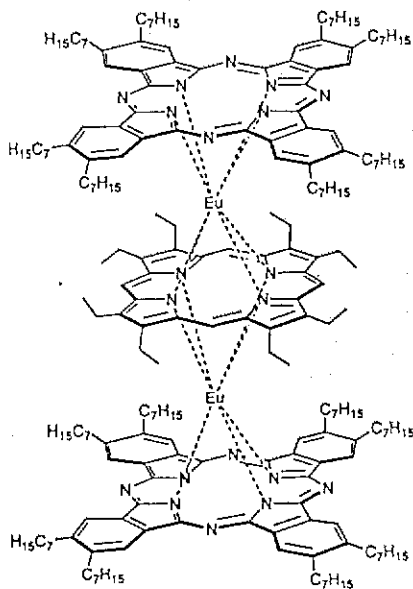

Supplement: b008224o5.pdf [file b008224o5.pdf]
