# Supplementary material for: Studies related to the design and synthesis of a molecular octal counter
Source: Royal Society of Chemistry journal article supplement (doi:10.1039/b008224o), 2001-01-01

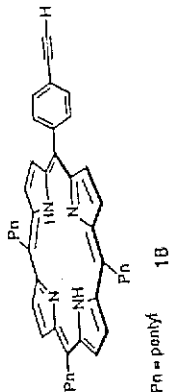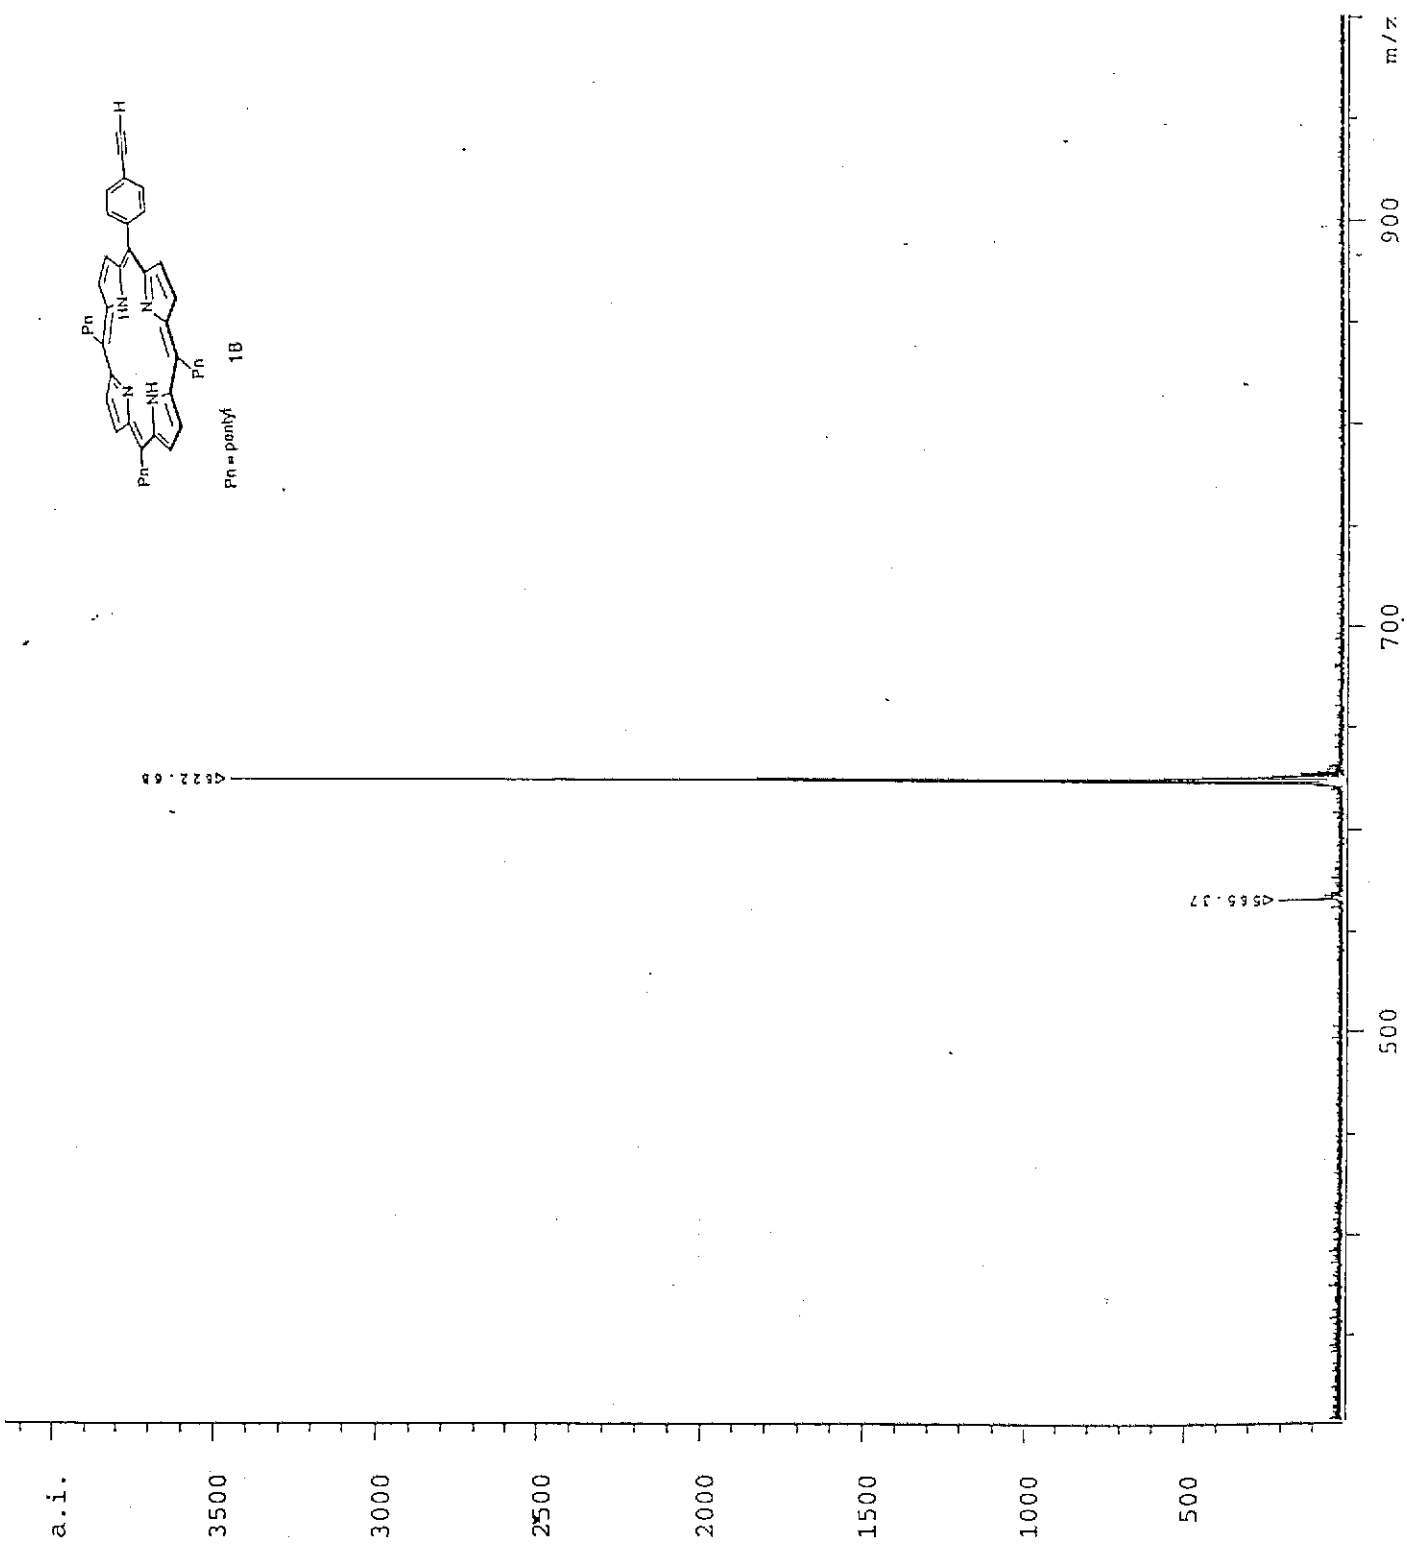

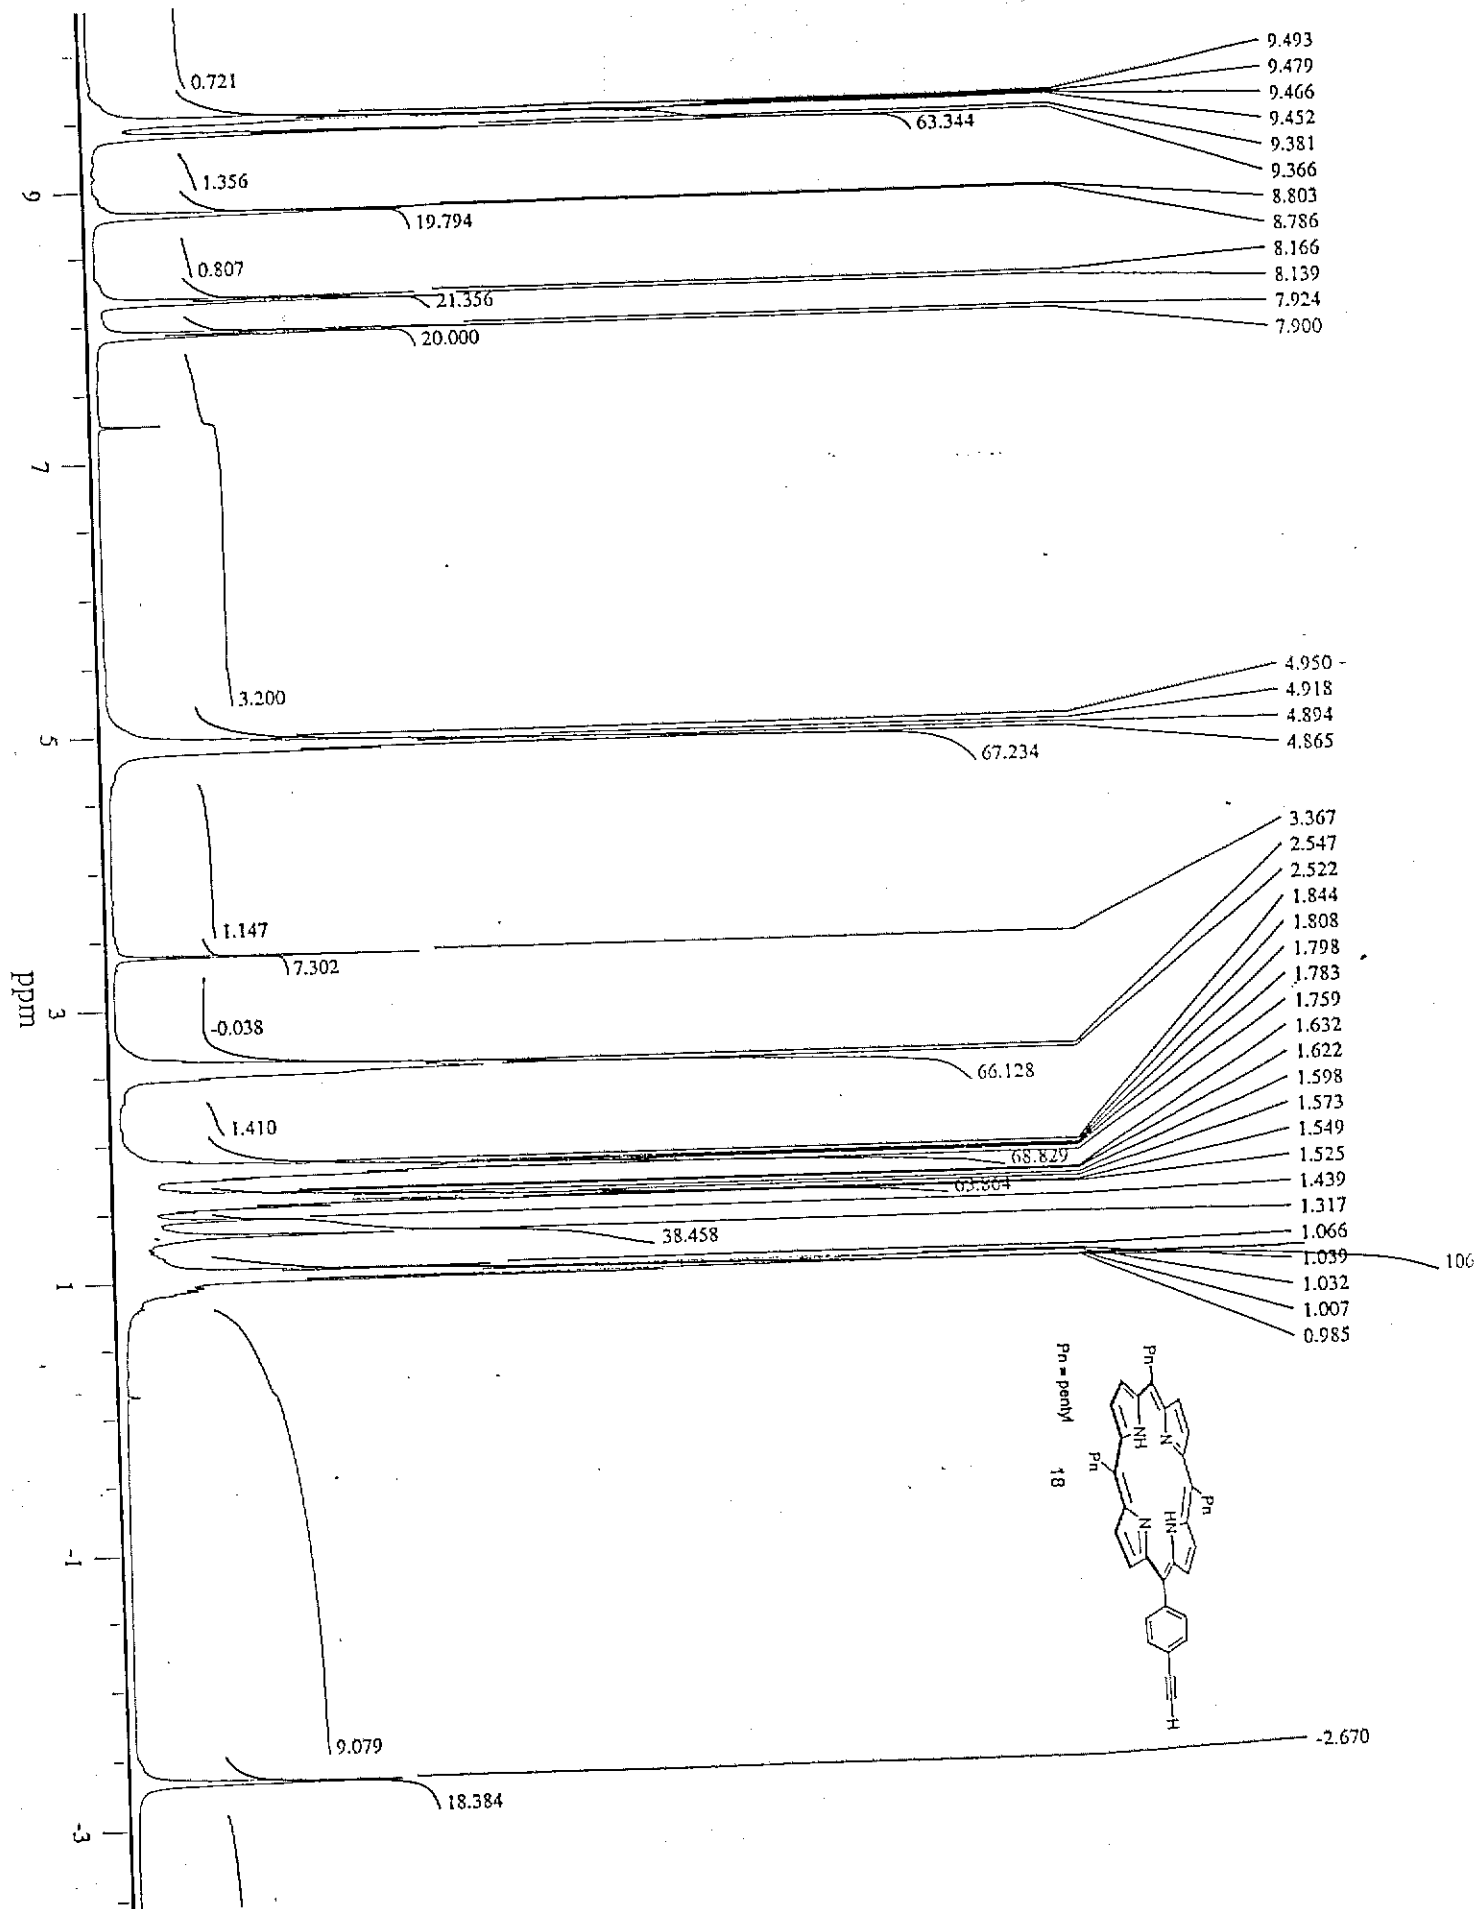

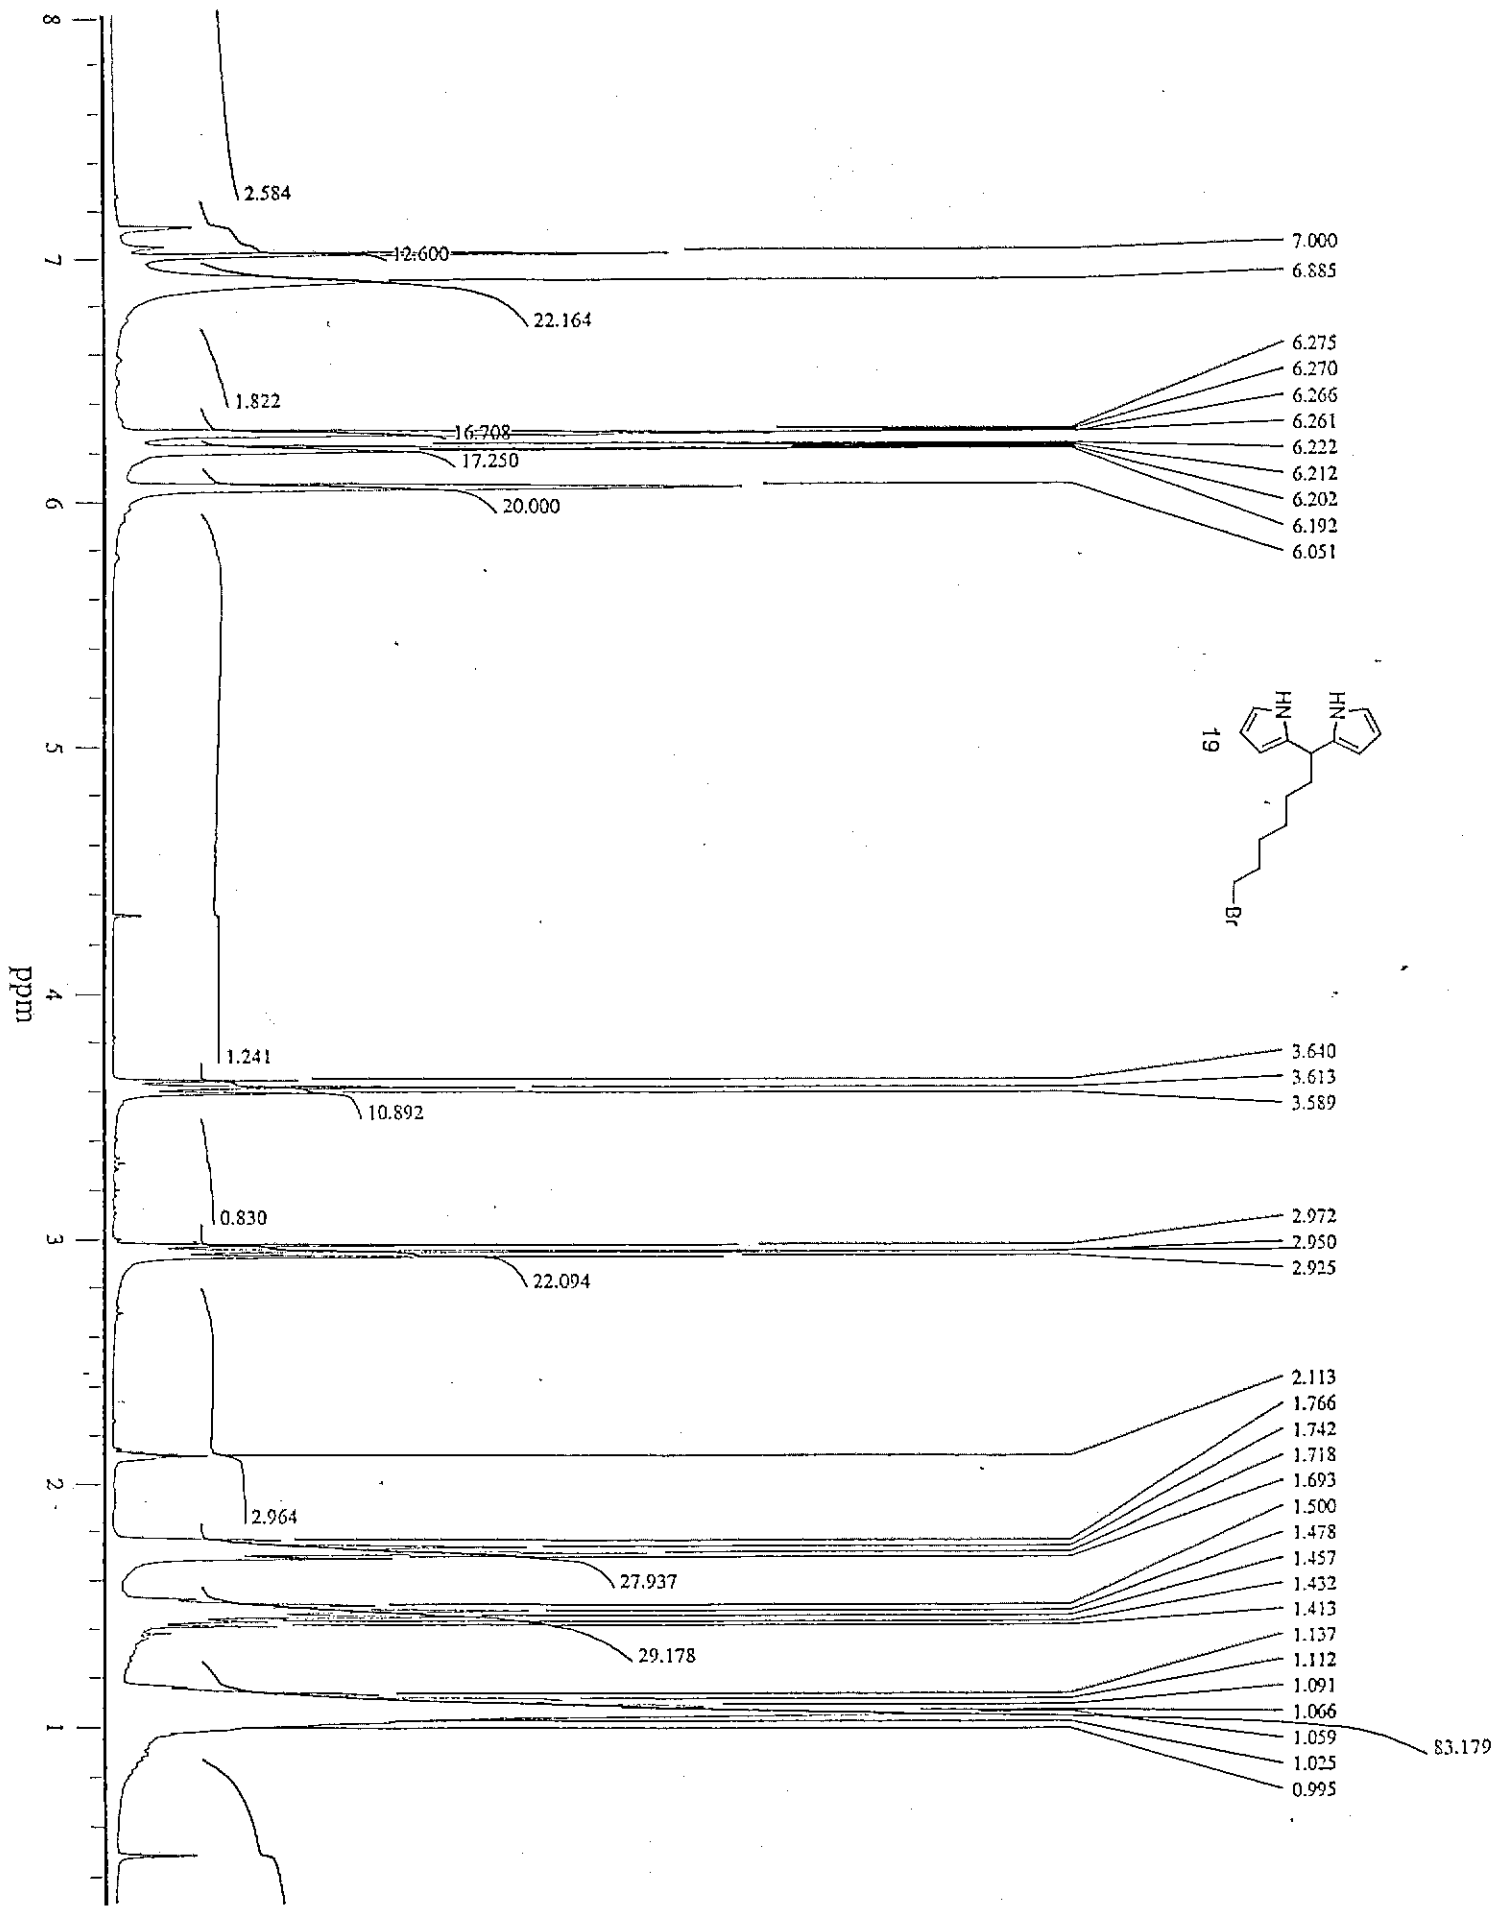

Overlaid Spectra:

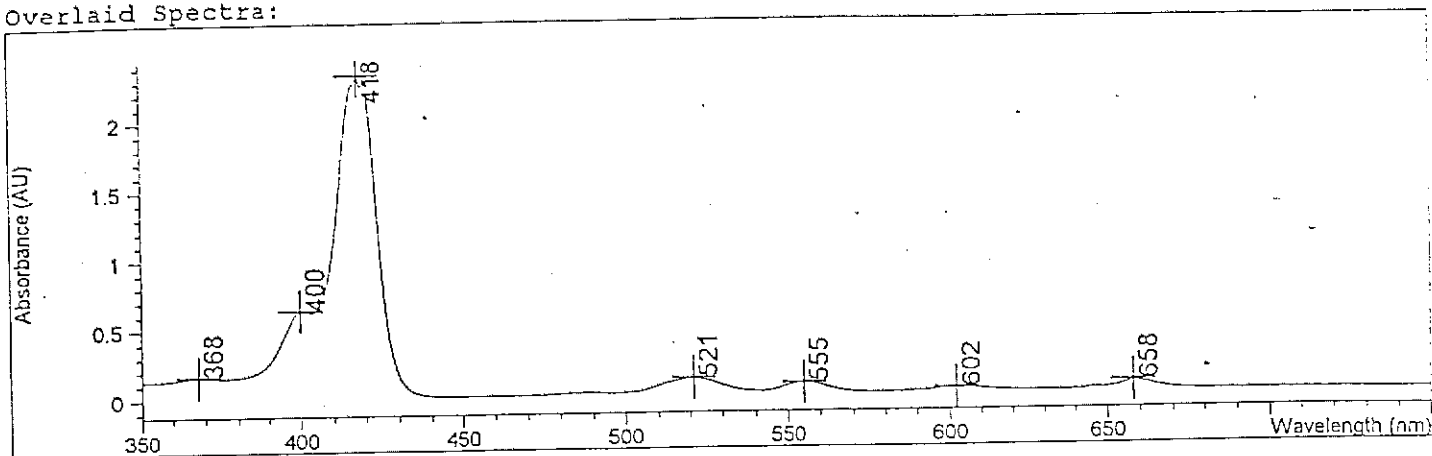

| # | Name | Peaks (nm) | Abs (AU)  |
|---|------|------------|-----------|
| 1 |      | 418.0      | 2.34250   |
| 1 |      | 400.0      | 0.63803   |
| 1 |      | 368.0      | 0.16588   |
| 1 |      | 521.0      | 0.11697   |
| 1 |      | 555.0      | 7.8193E-2 |
| 1 |      | 658.0      | 7.0636E-2 |
| 1 |      | 602.0      | 2.9436E-2 |

Report generated by :

Signature: .....

\*\*\* End Spectrum/Peak Report \*\*\*

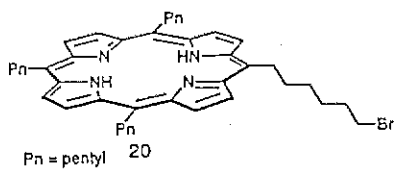

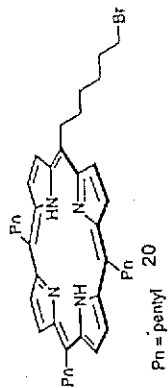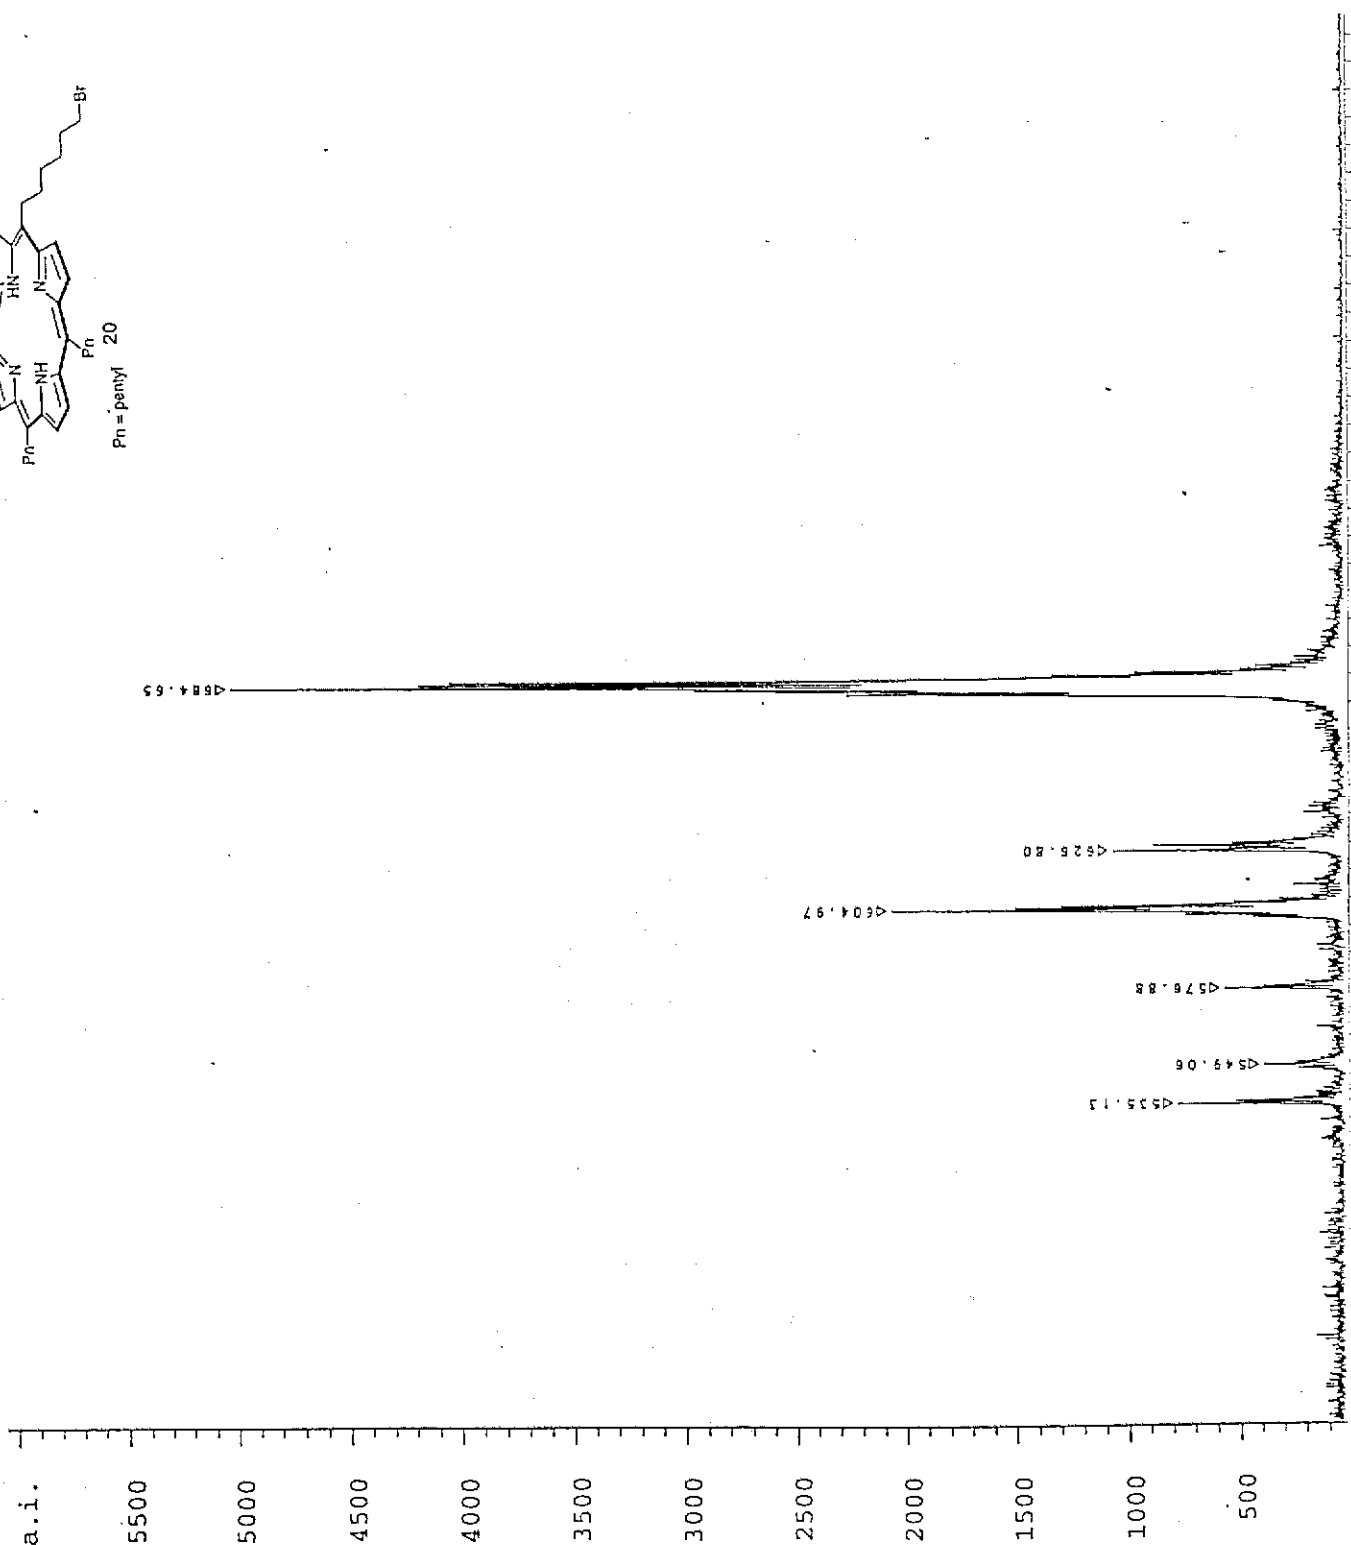

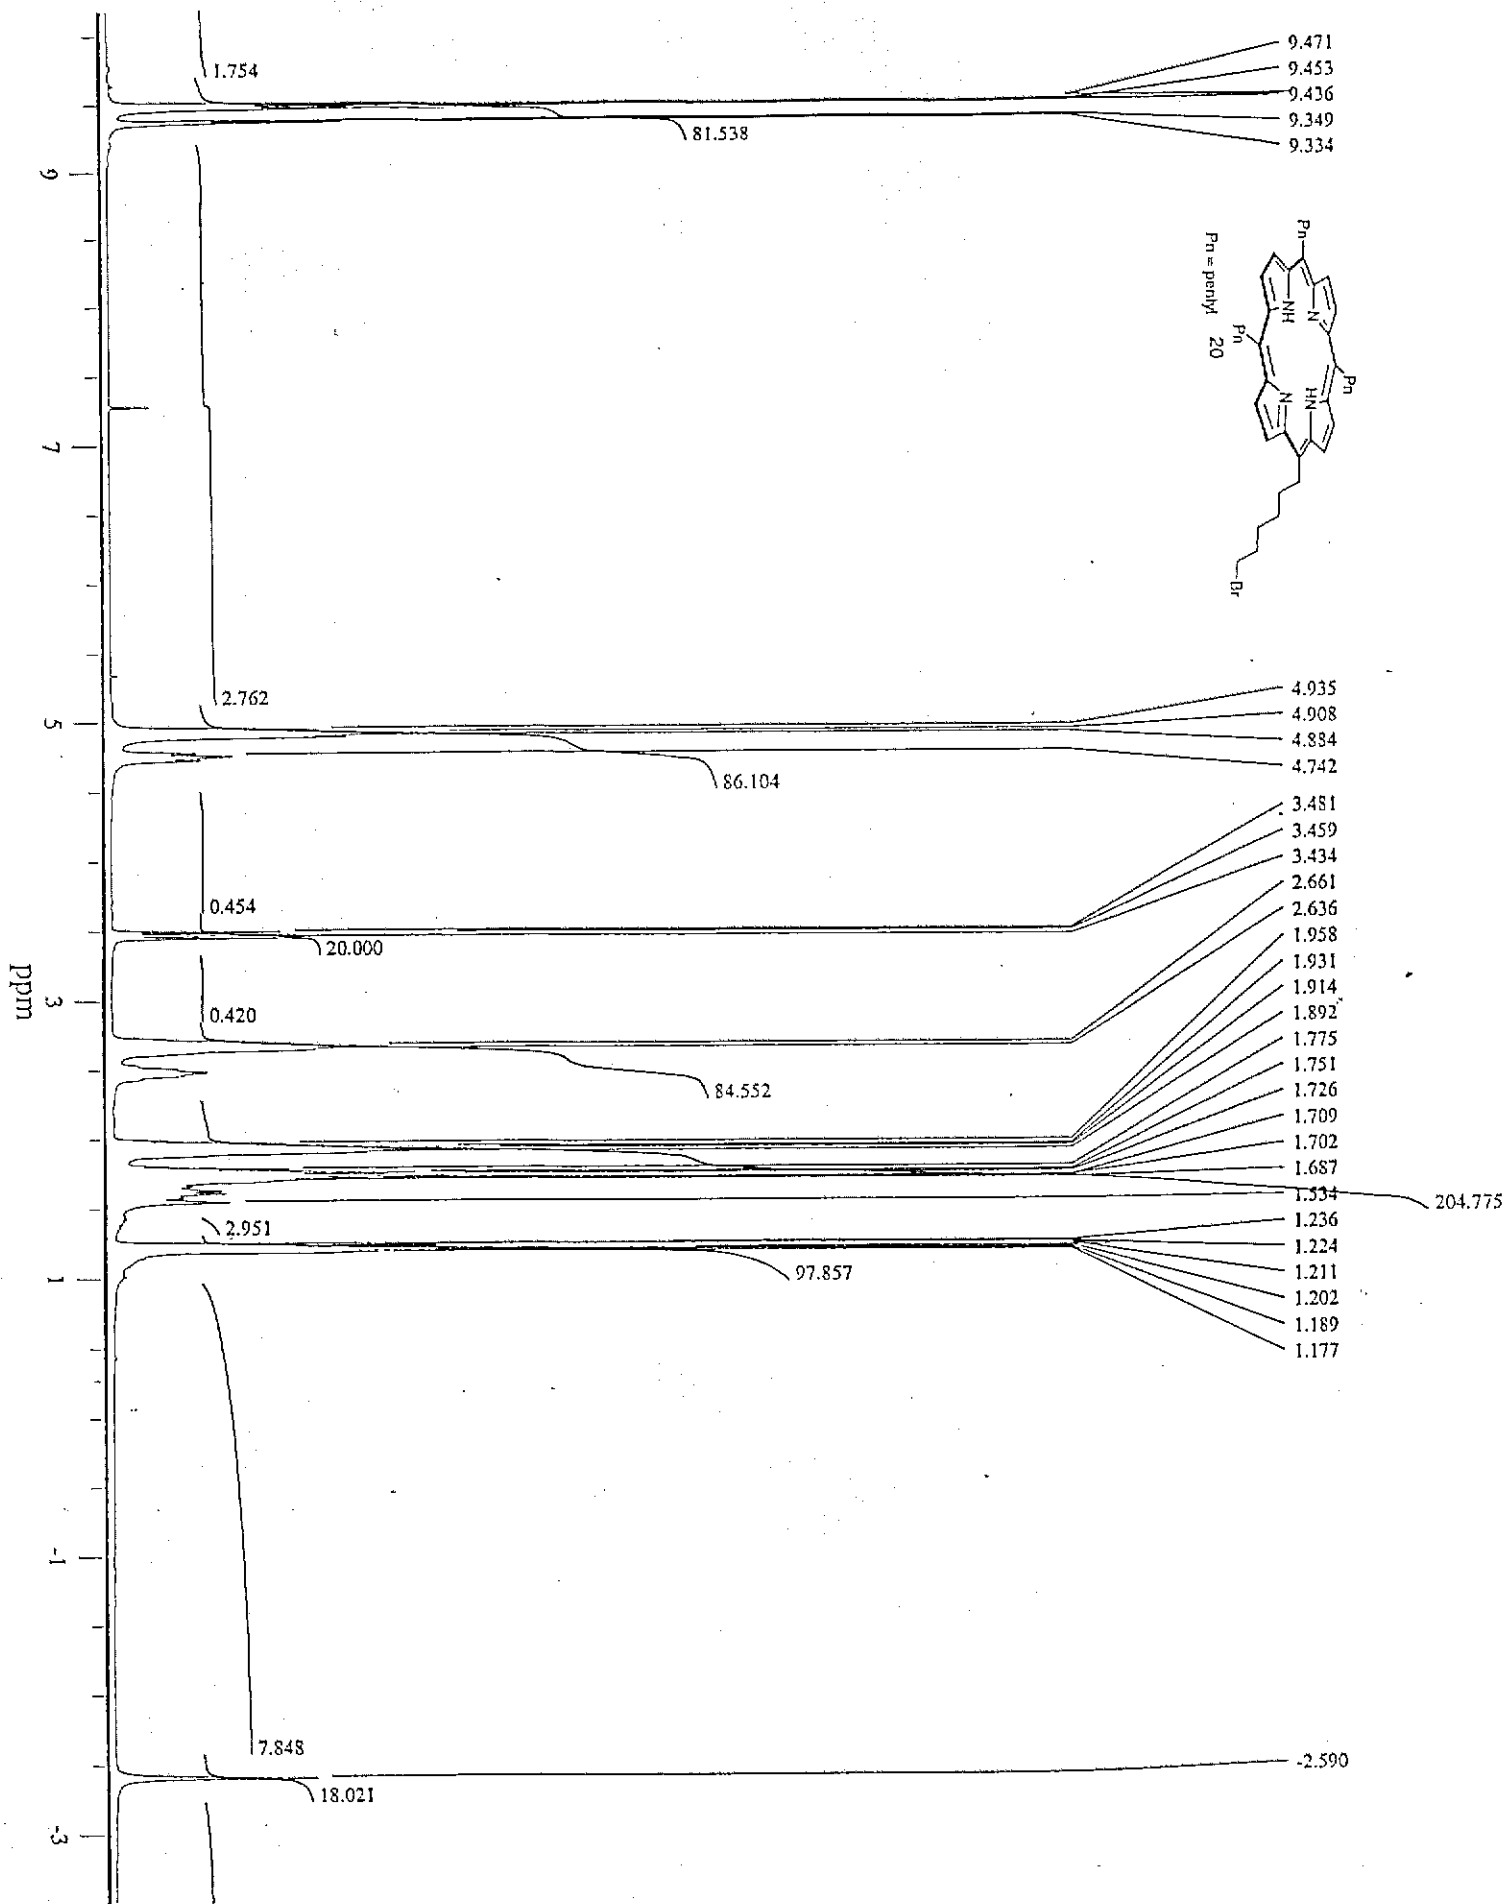

Overlaid Spectra:

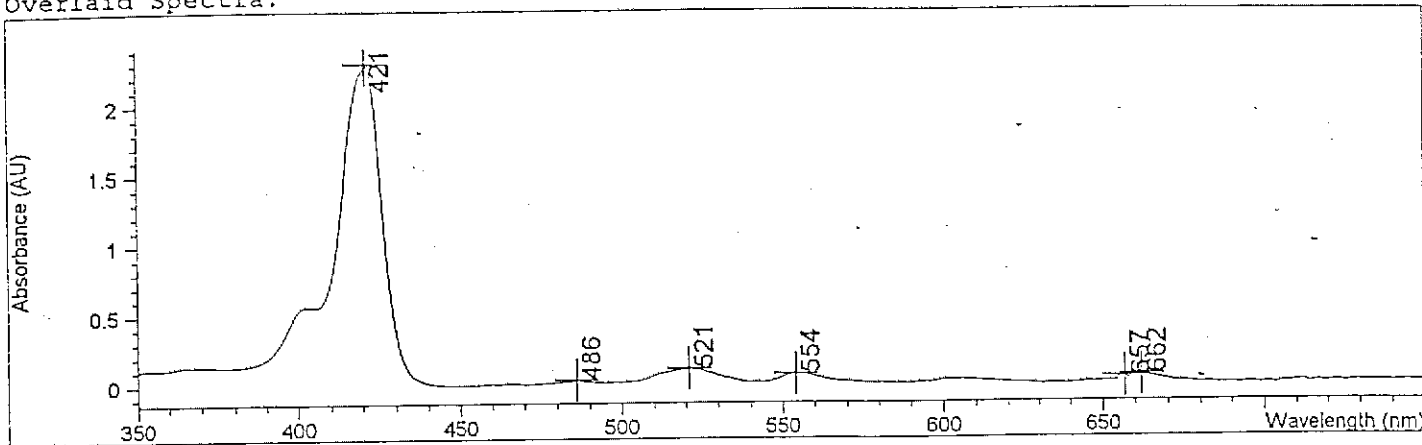

| # | Name | Peaks (nm) | Abs (AU)  |
|---|------|------------|-----------|
| 1 |      | 421.0      | 2.30560   |
| 1 |      | 521.0      | 0.10734   |
| 1 |      | 554.0      | 6.8851E-2 |
| 1 |      | 662.0      | 4.8553E-2 |
| 1 |      | 657.0      | 3.6391E-2 |
| 1 |      | 486.0      | 3.1599E-2 |

Report generated by :

Signature: .....

\*\*\* End Spectrum/Peak Report \*\*\*

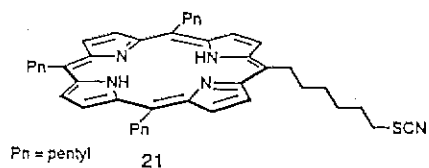





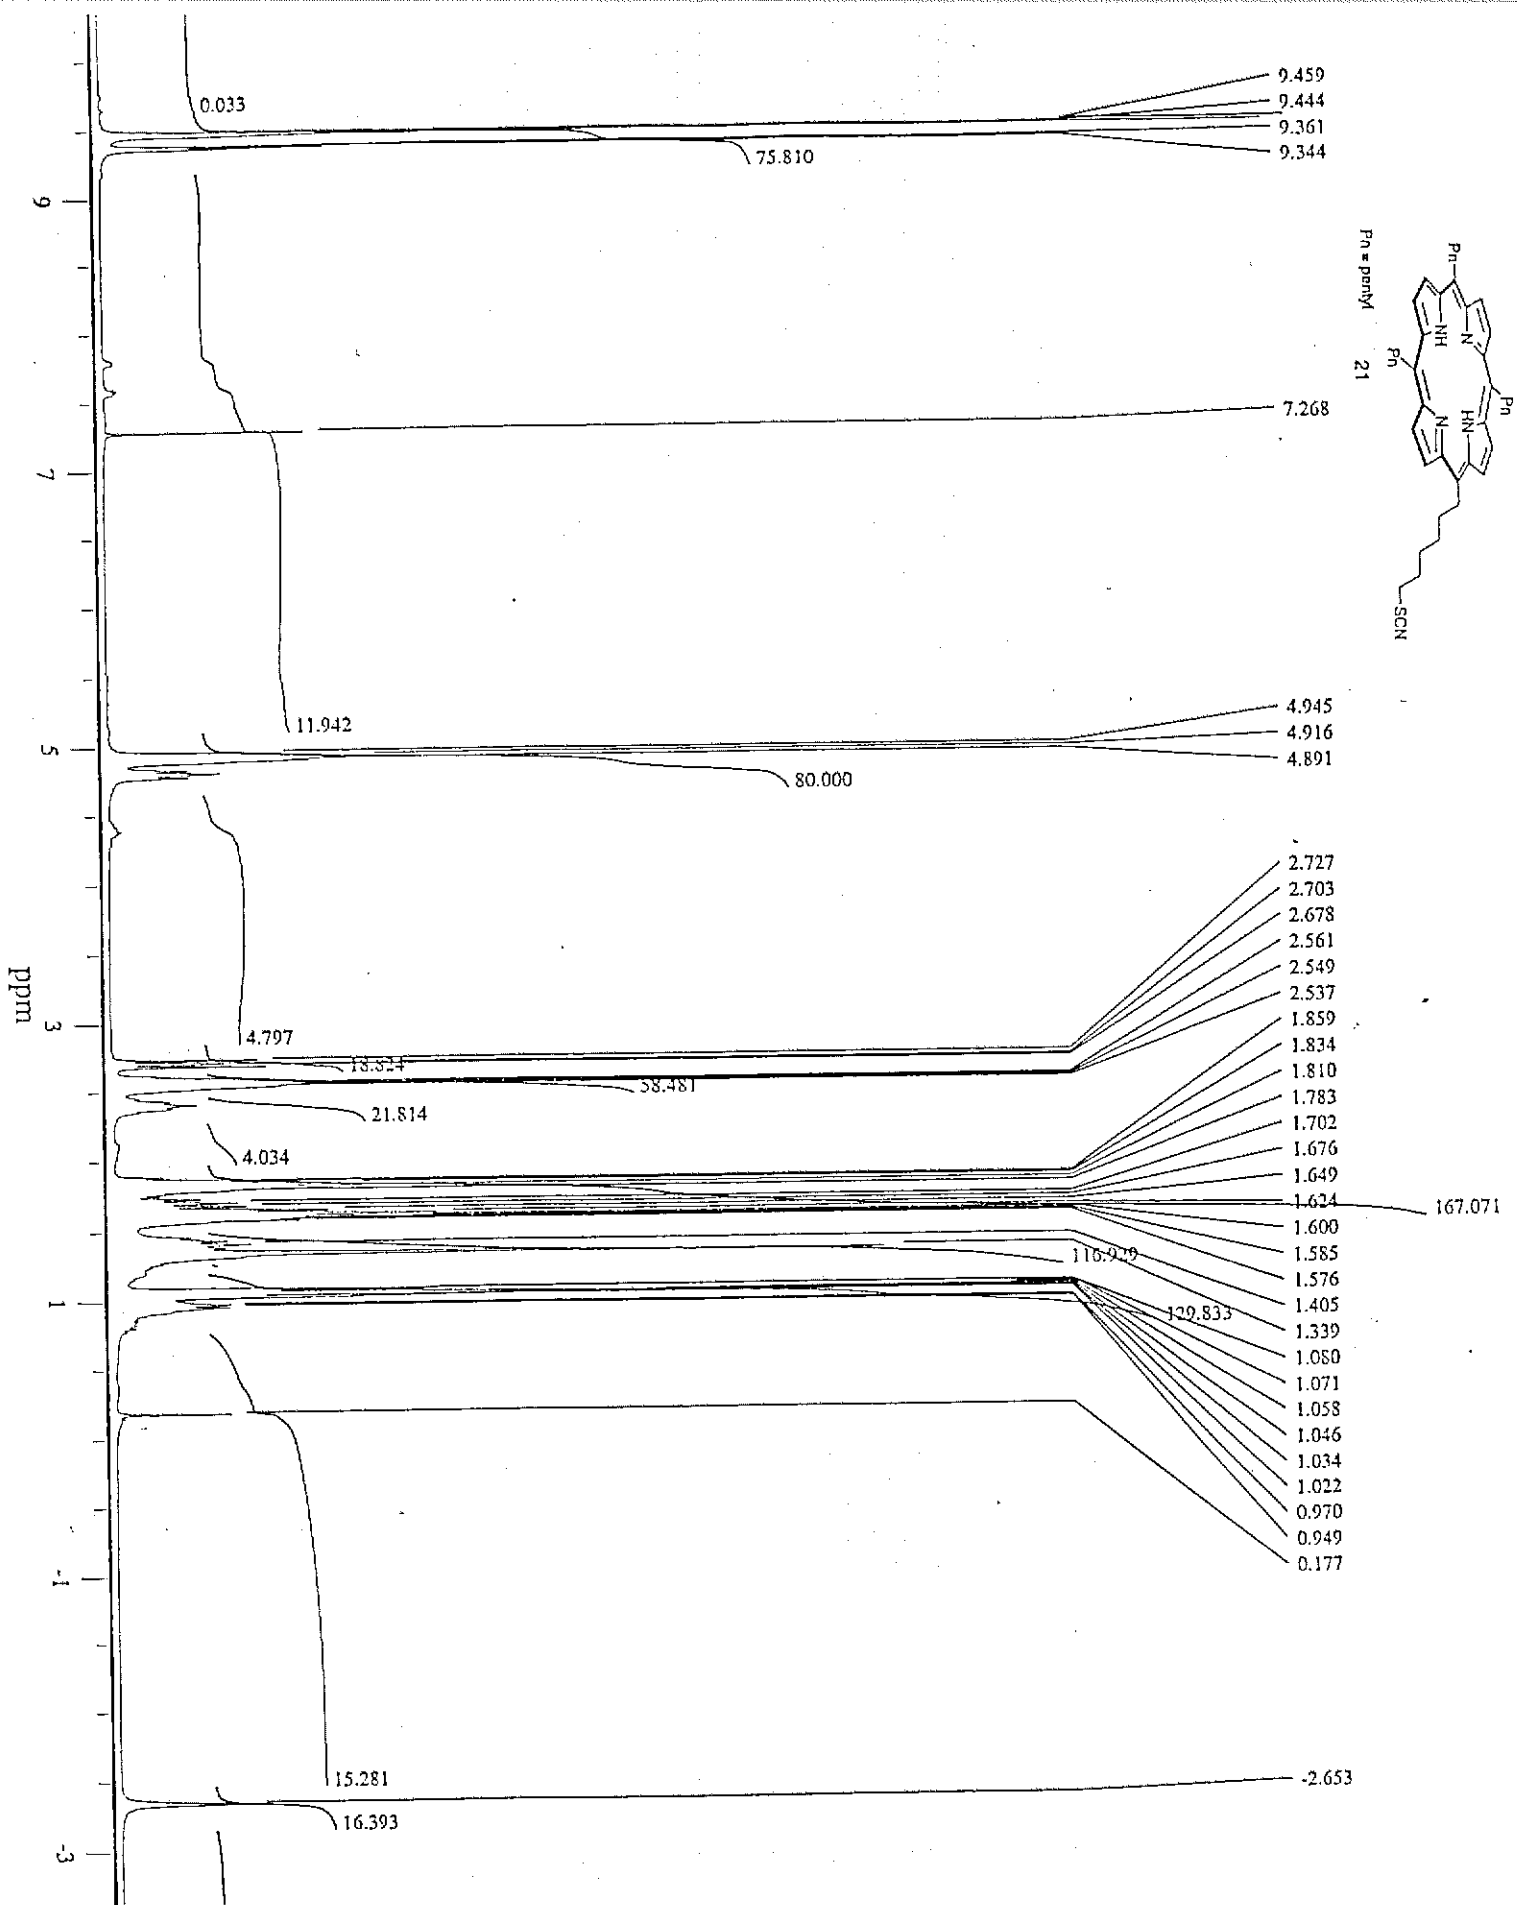

Overlaid Spectra:

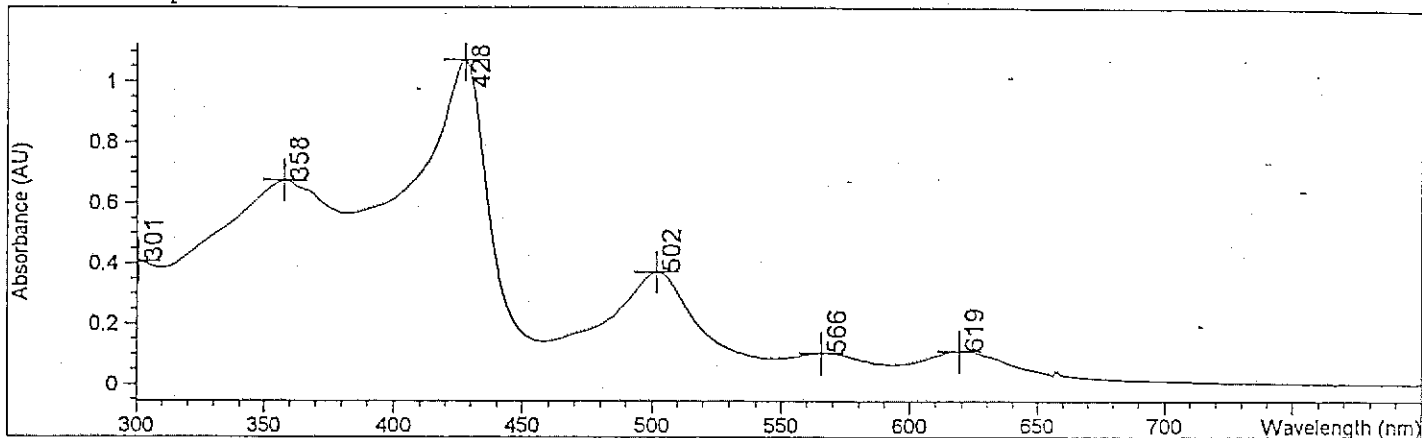

| # | Name | Peaks (nm) | Abs (AU) |
|---|------|------------|----------|
| 1 |      | 428.0      | 1.07210  |
| 1 |      | 358.0      | 0.67412  |
| 1 |      | 301.0      | 0.40633  |
| 1 |      | 502.0      | 0.37057  |
| 1 |      | 619.0      | 0.10931  |
| 1 |      | 566.0      | 0.10291  |

Report generated by :

Signature: .....

\*\*\* End Spectrum/Peak Report \*\*\*

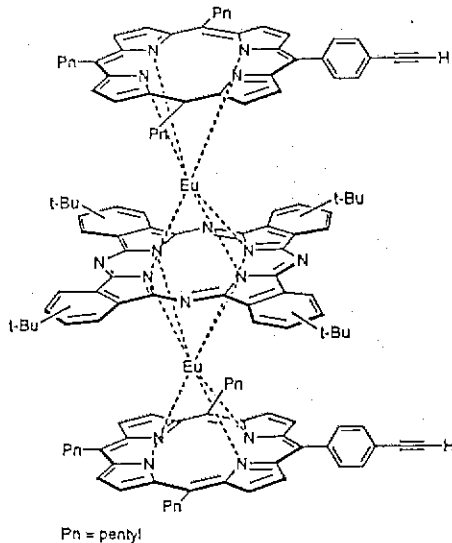

Supplement: b008224o7.pdf [file b008224o7.pdf]
