# Supplementary material for: Studies related to the design and synthesis of a molecular octal counter
Source: Royal Society of Chemistry journal article supplement (doi:10.1039/b008224o), 2001-01-01

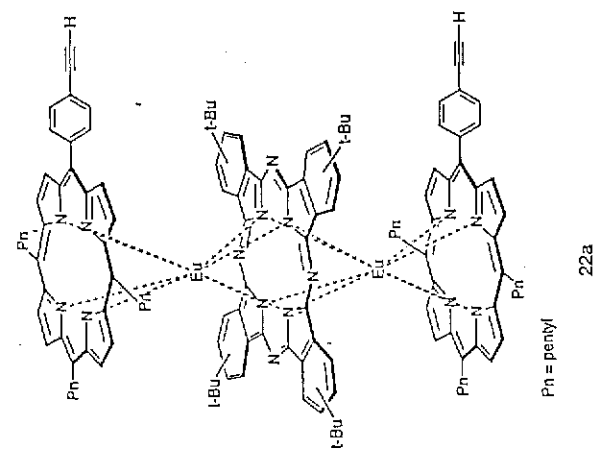

Ph = phenyl

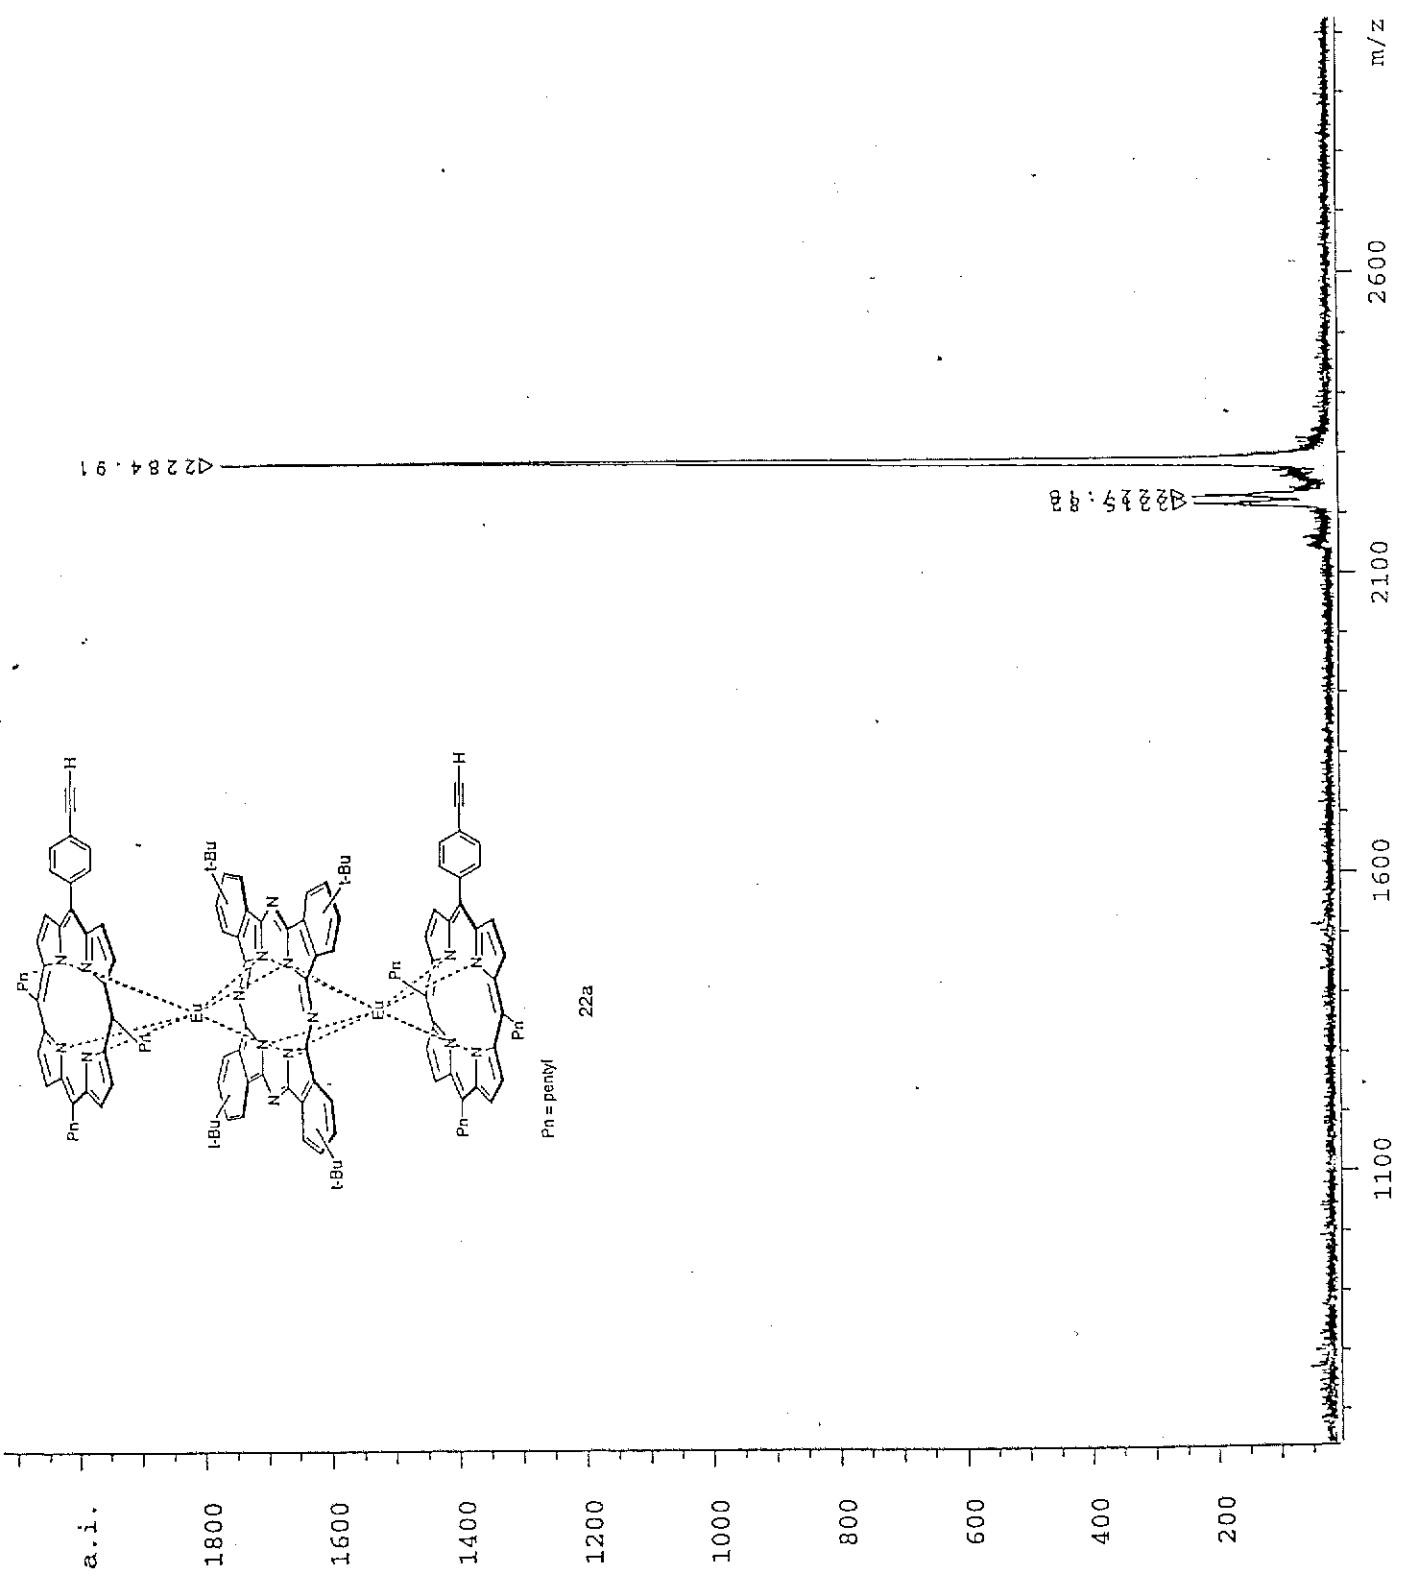

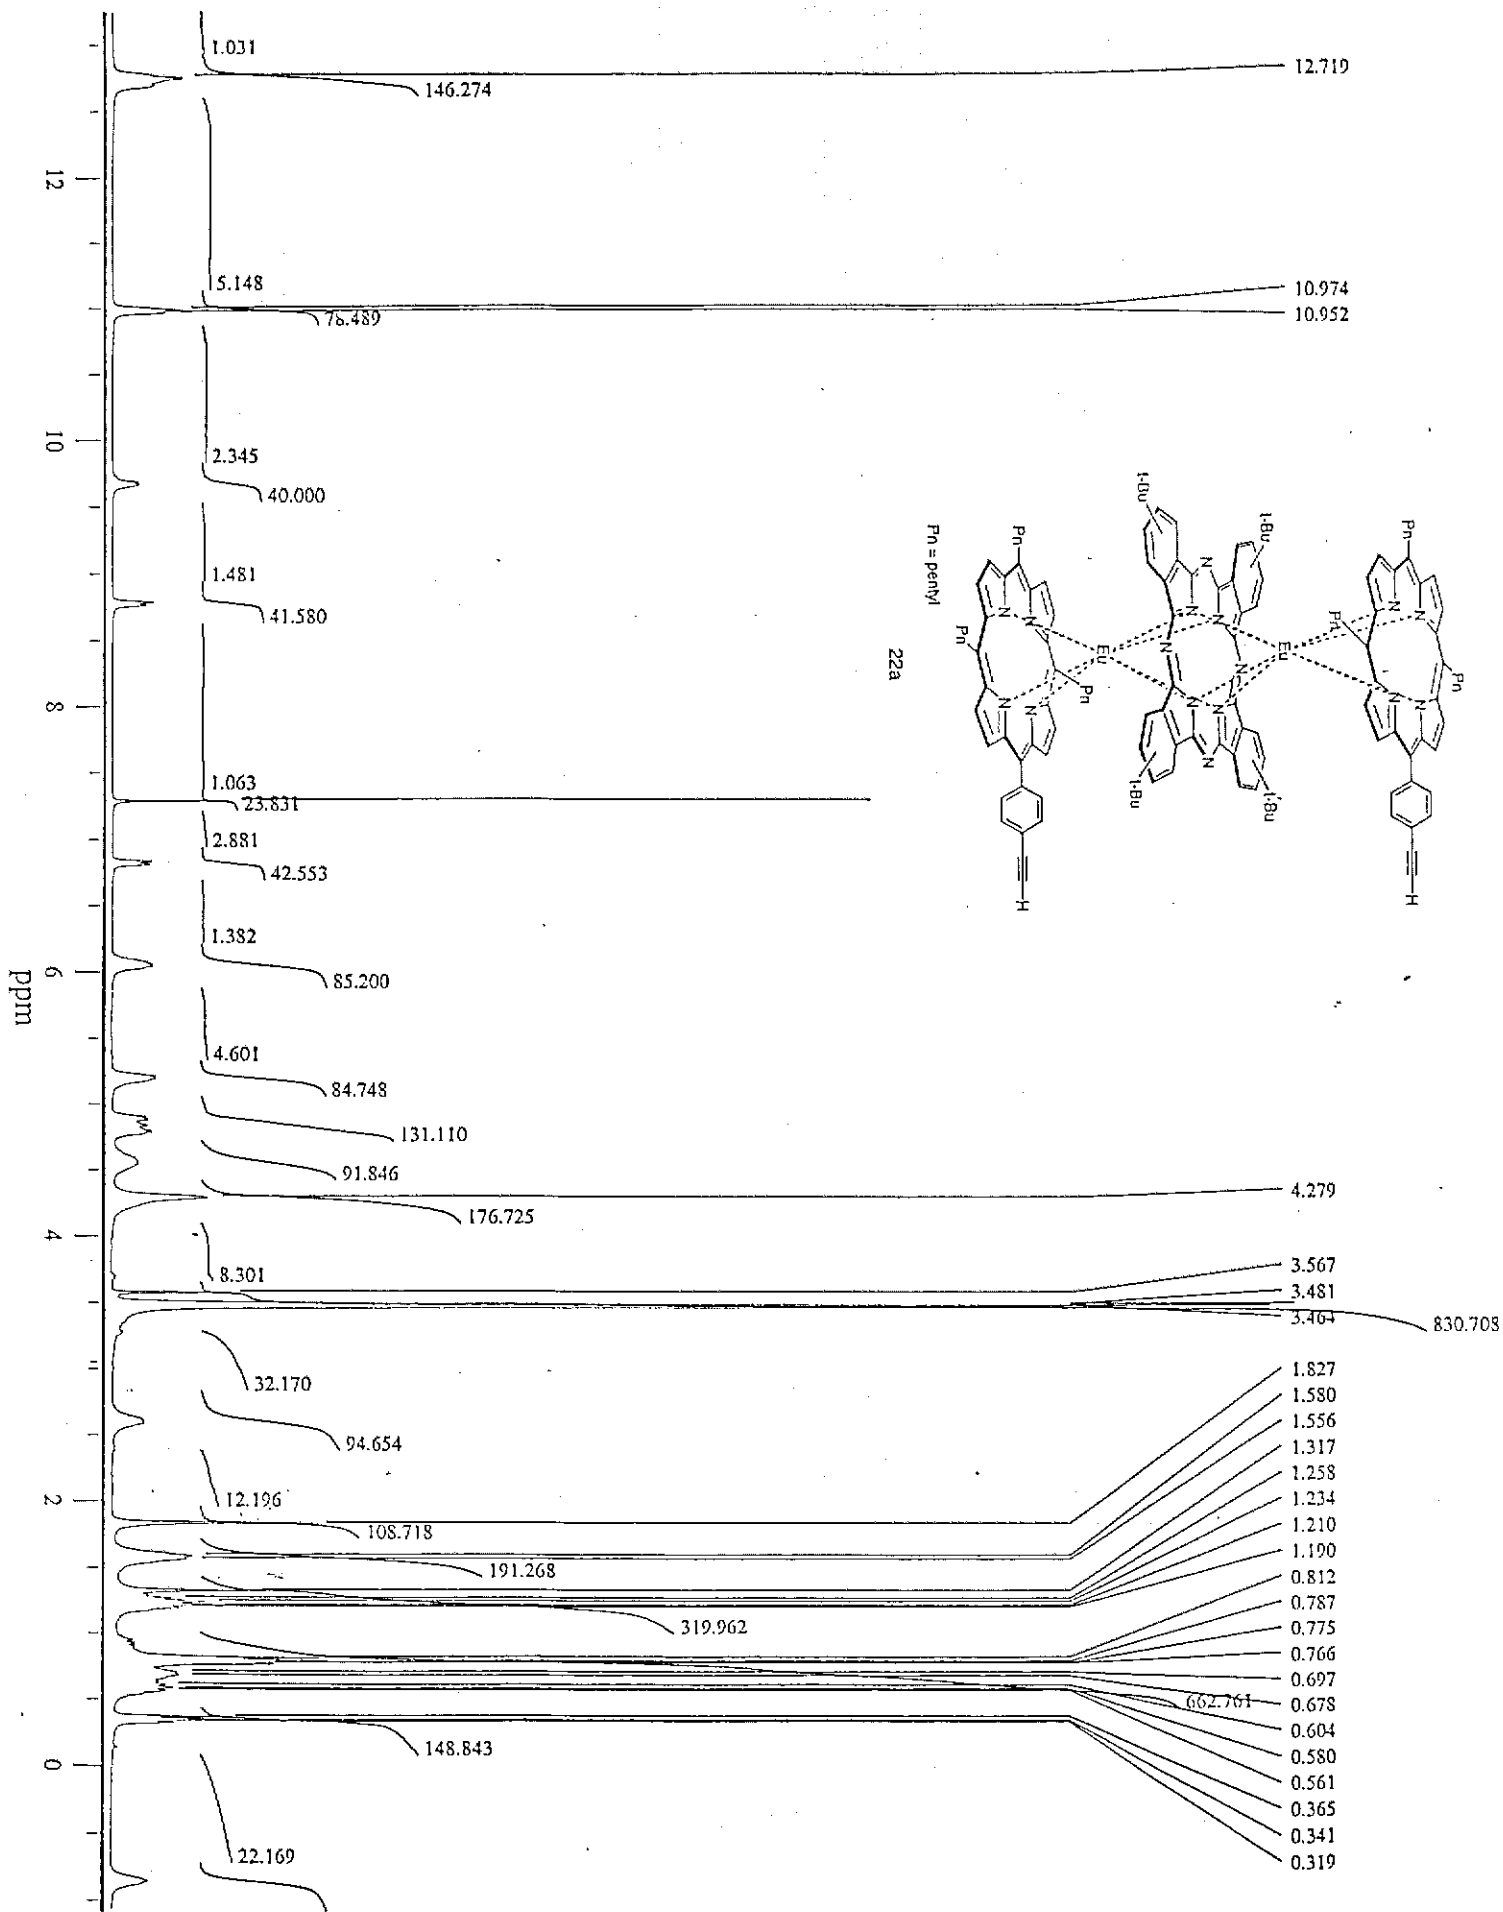

Overlaid Spectra:

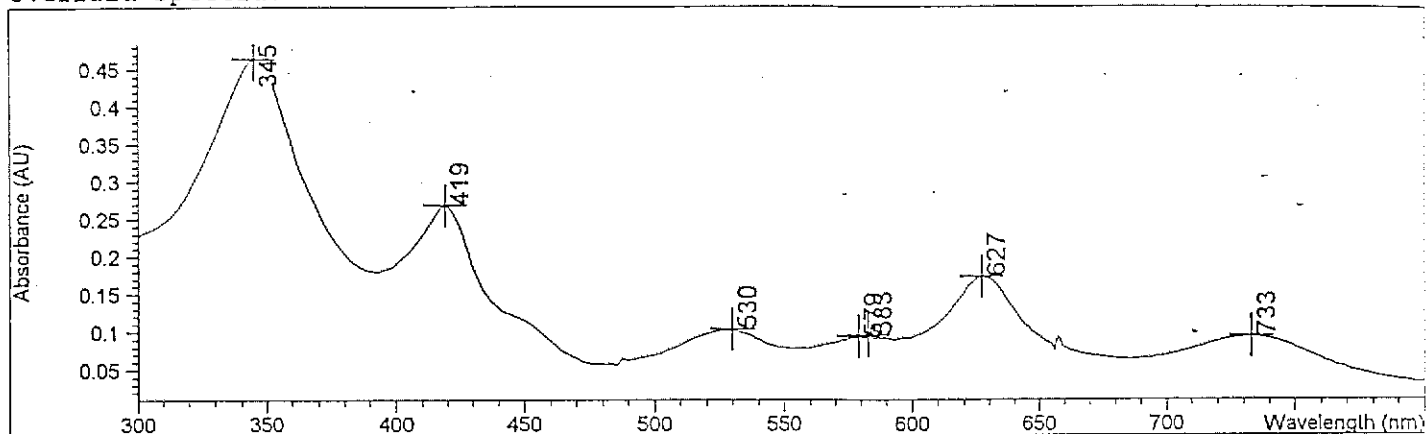

| # | Name | Peaks (nm) | Abs (AU)  |
|---|------|------------|-----------|
| 1 |      | 345.0      | 0.46398   |
| 1 |      | 419.0      | 0.26867   |
| 1 |      | 627.0      | 0.17319   |
| 1 |      | 530.0      | 0.10311   |
| 1 |      | 583.0      | 9.6027E-2 |
| 1 |      | 579.0      | 9.3989E-2 |
| 1 |      | 733.0      | 9.3691E-2 |

Report generated by :

Signature: .....

\*\*\* End Spectrum/Peak Report \*\*\*

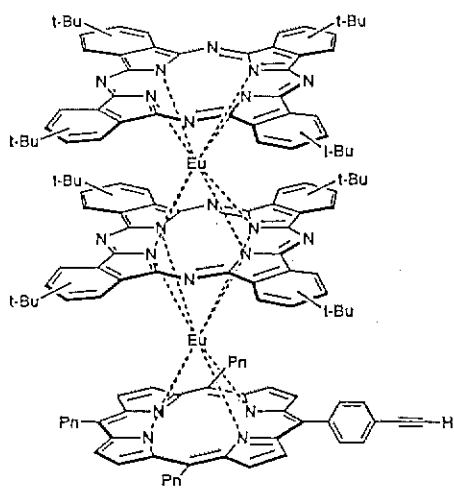

Pn = pentyl

22c

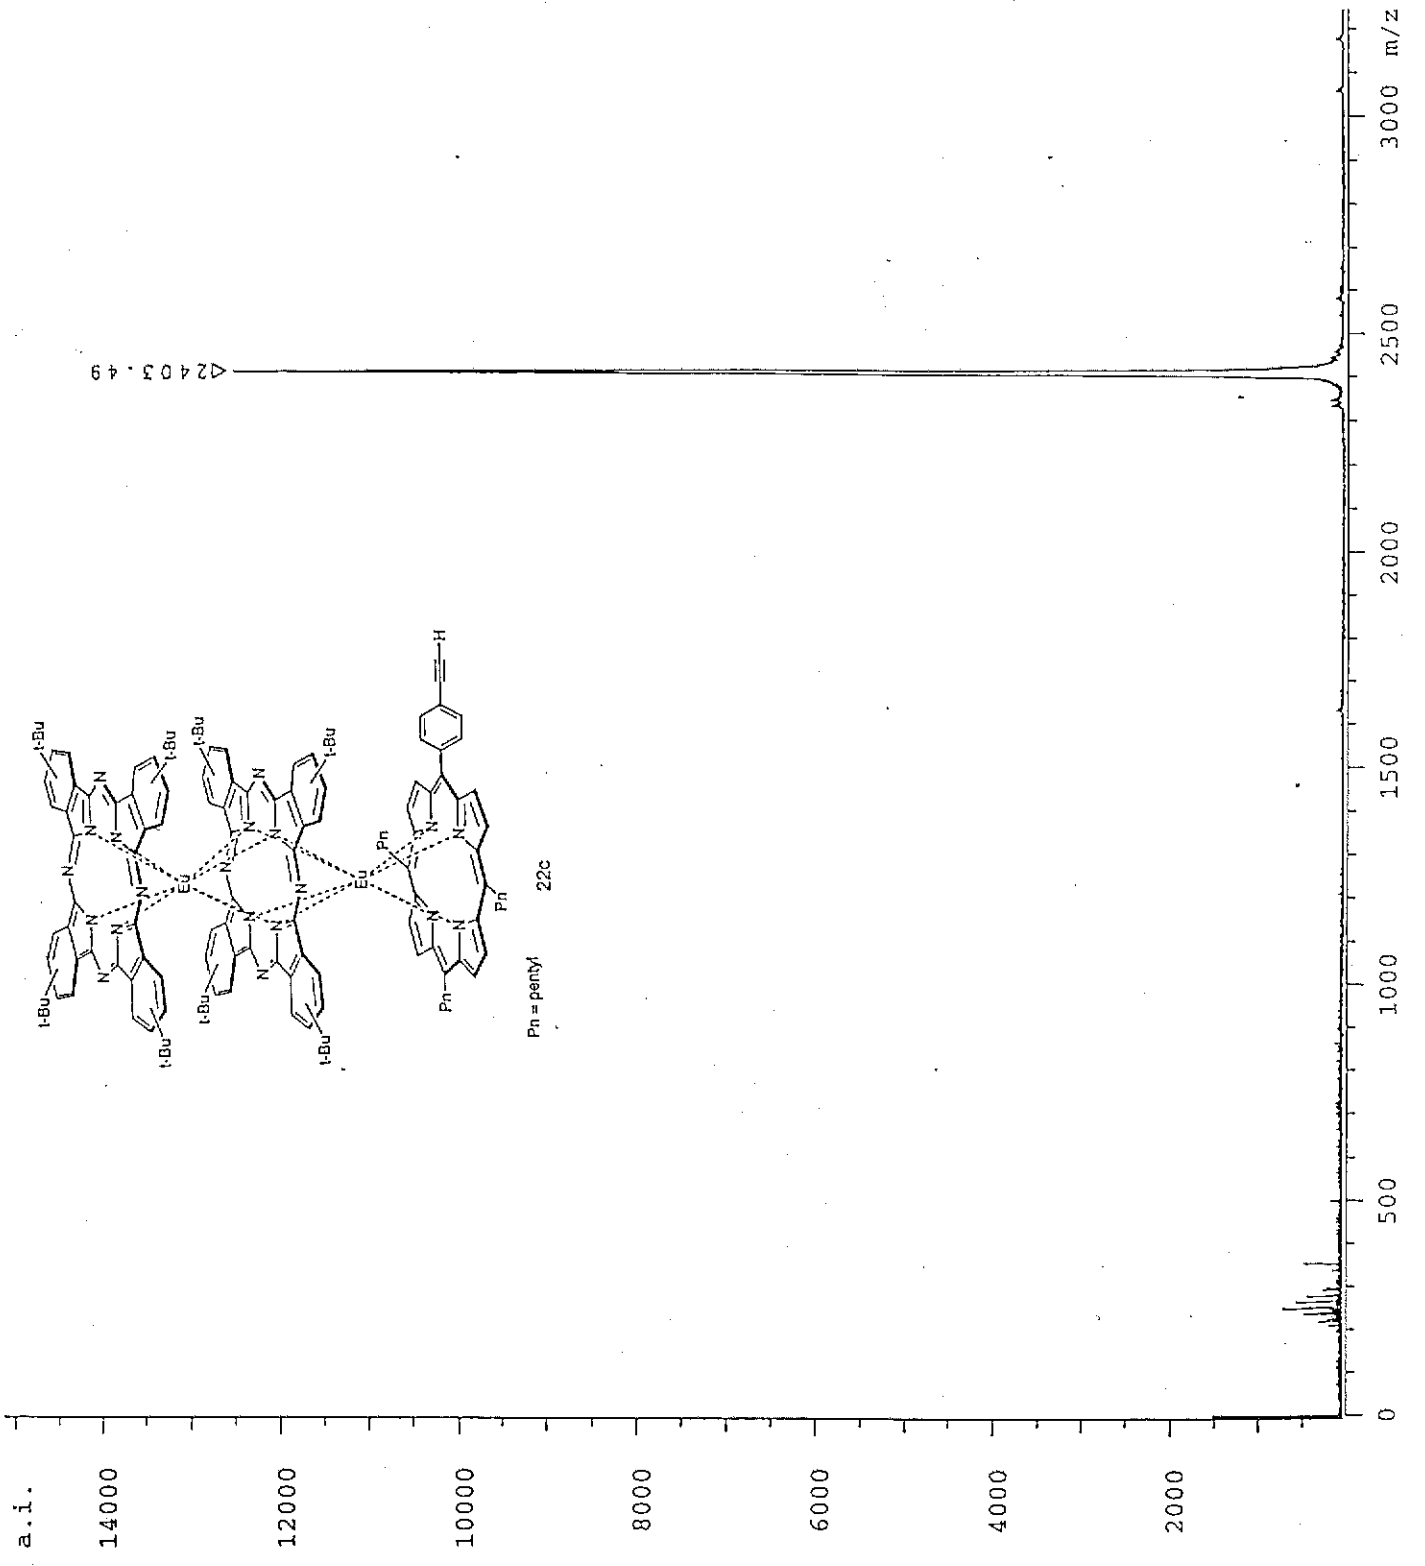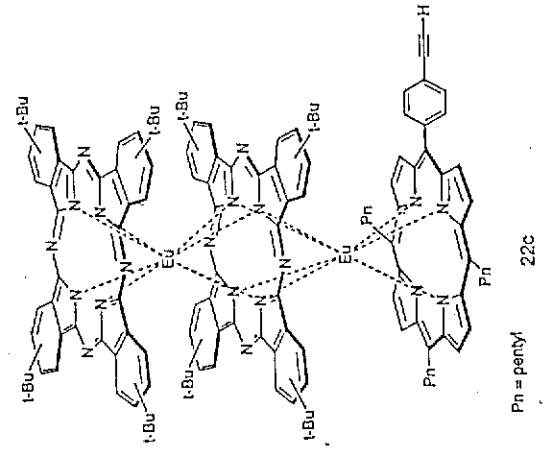

Overlaid Spectra:

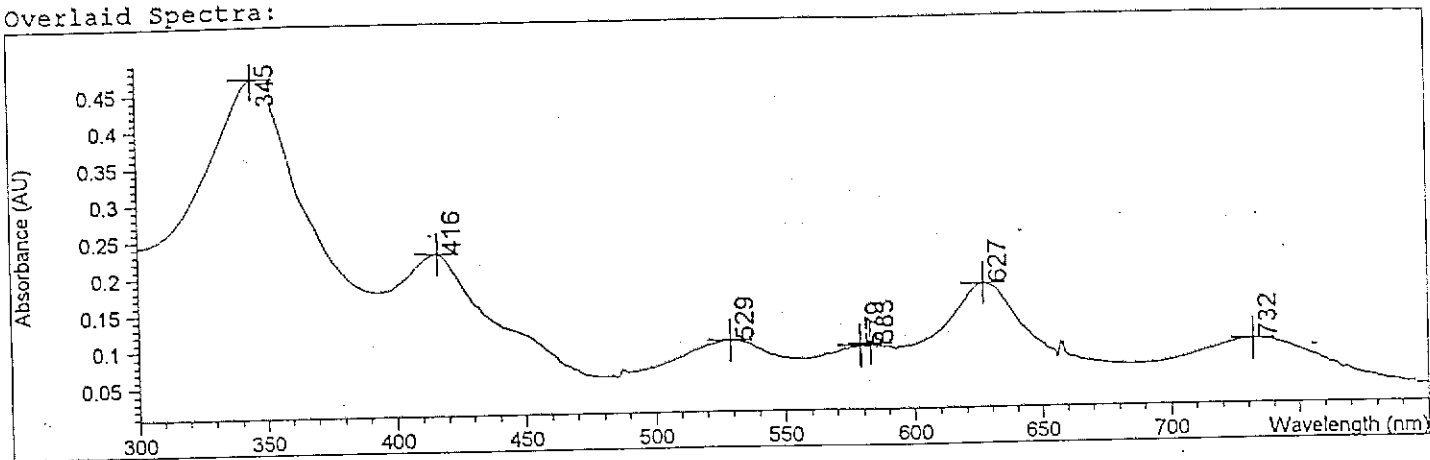

| # | Name | Peaks (nm) | Abs (AU)  |
|---|------|------------|-----------|
| 1 |      | 345.0      | 0.46997   |
| 1 |      | 416.0      | 0.22842   |
| 1 |      | 627.0      | 0.17589   |
| 1 |      | 529.0      | 0.10399   |
| 1 |      | 583.0      | 9.7350E-2 |
| 1 |      | 579.0      | 9.4756E-2 |
| 1 |      | 732.0      | 9.4451E-2 |

Report generated by :

Signature: .....

\*\*\* End Spectrum/Peak Report \*\*\*

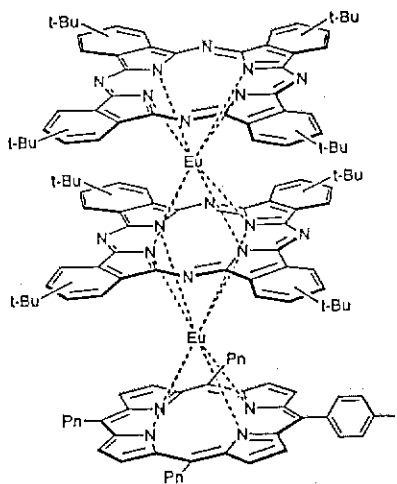

Pn = pentyl

23c

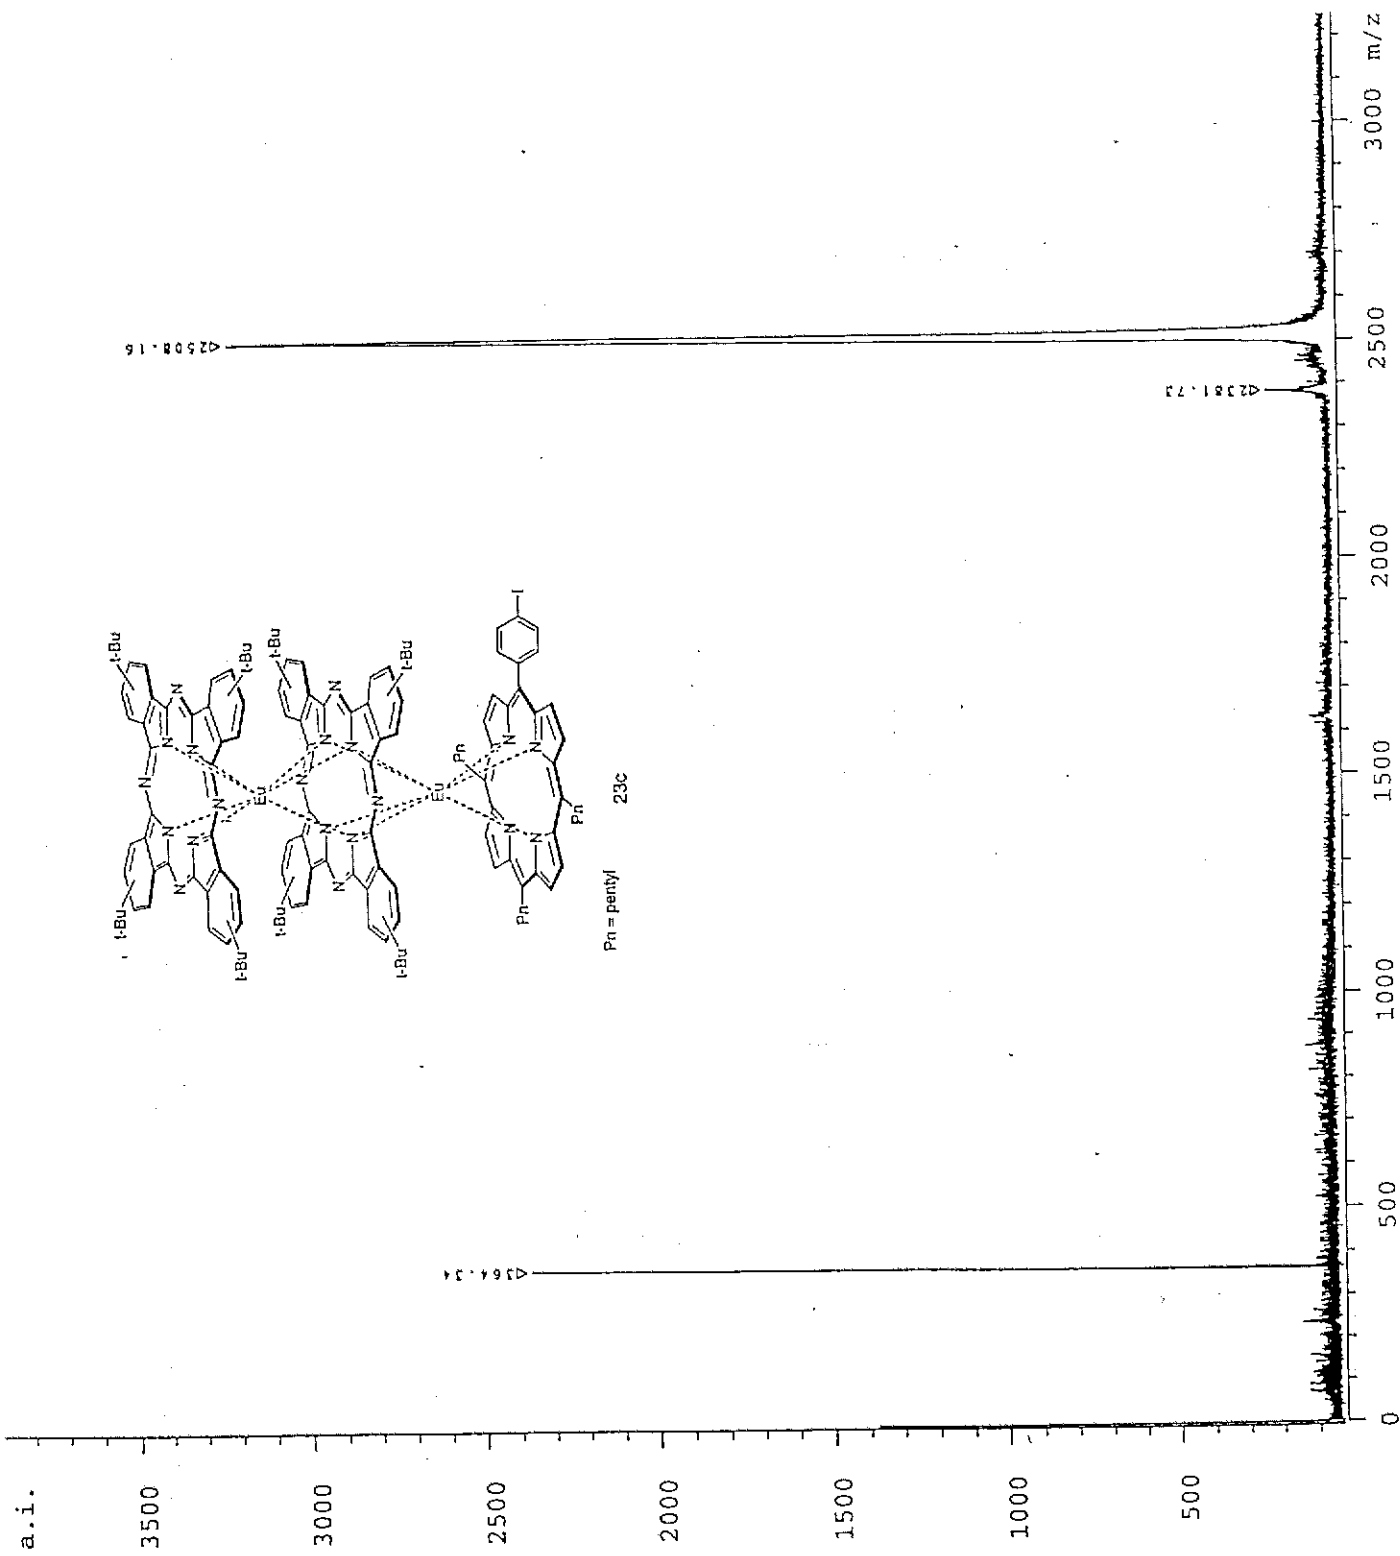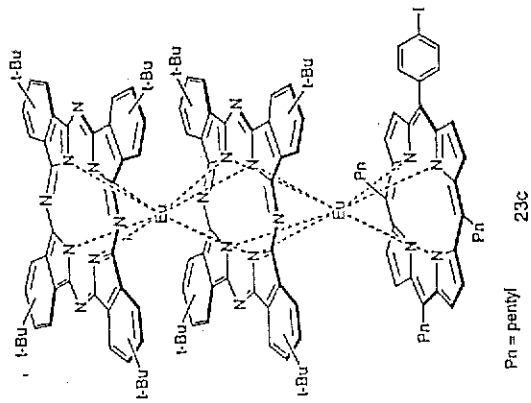

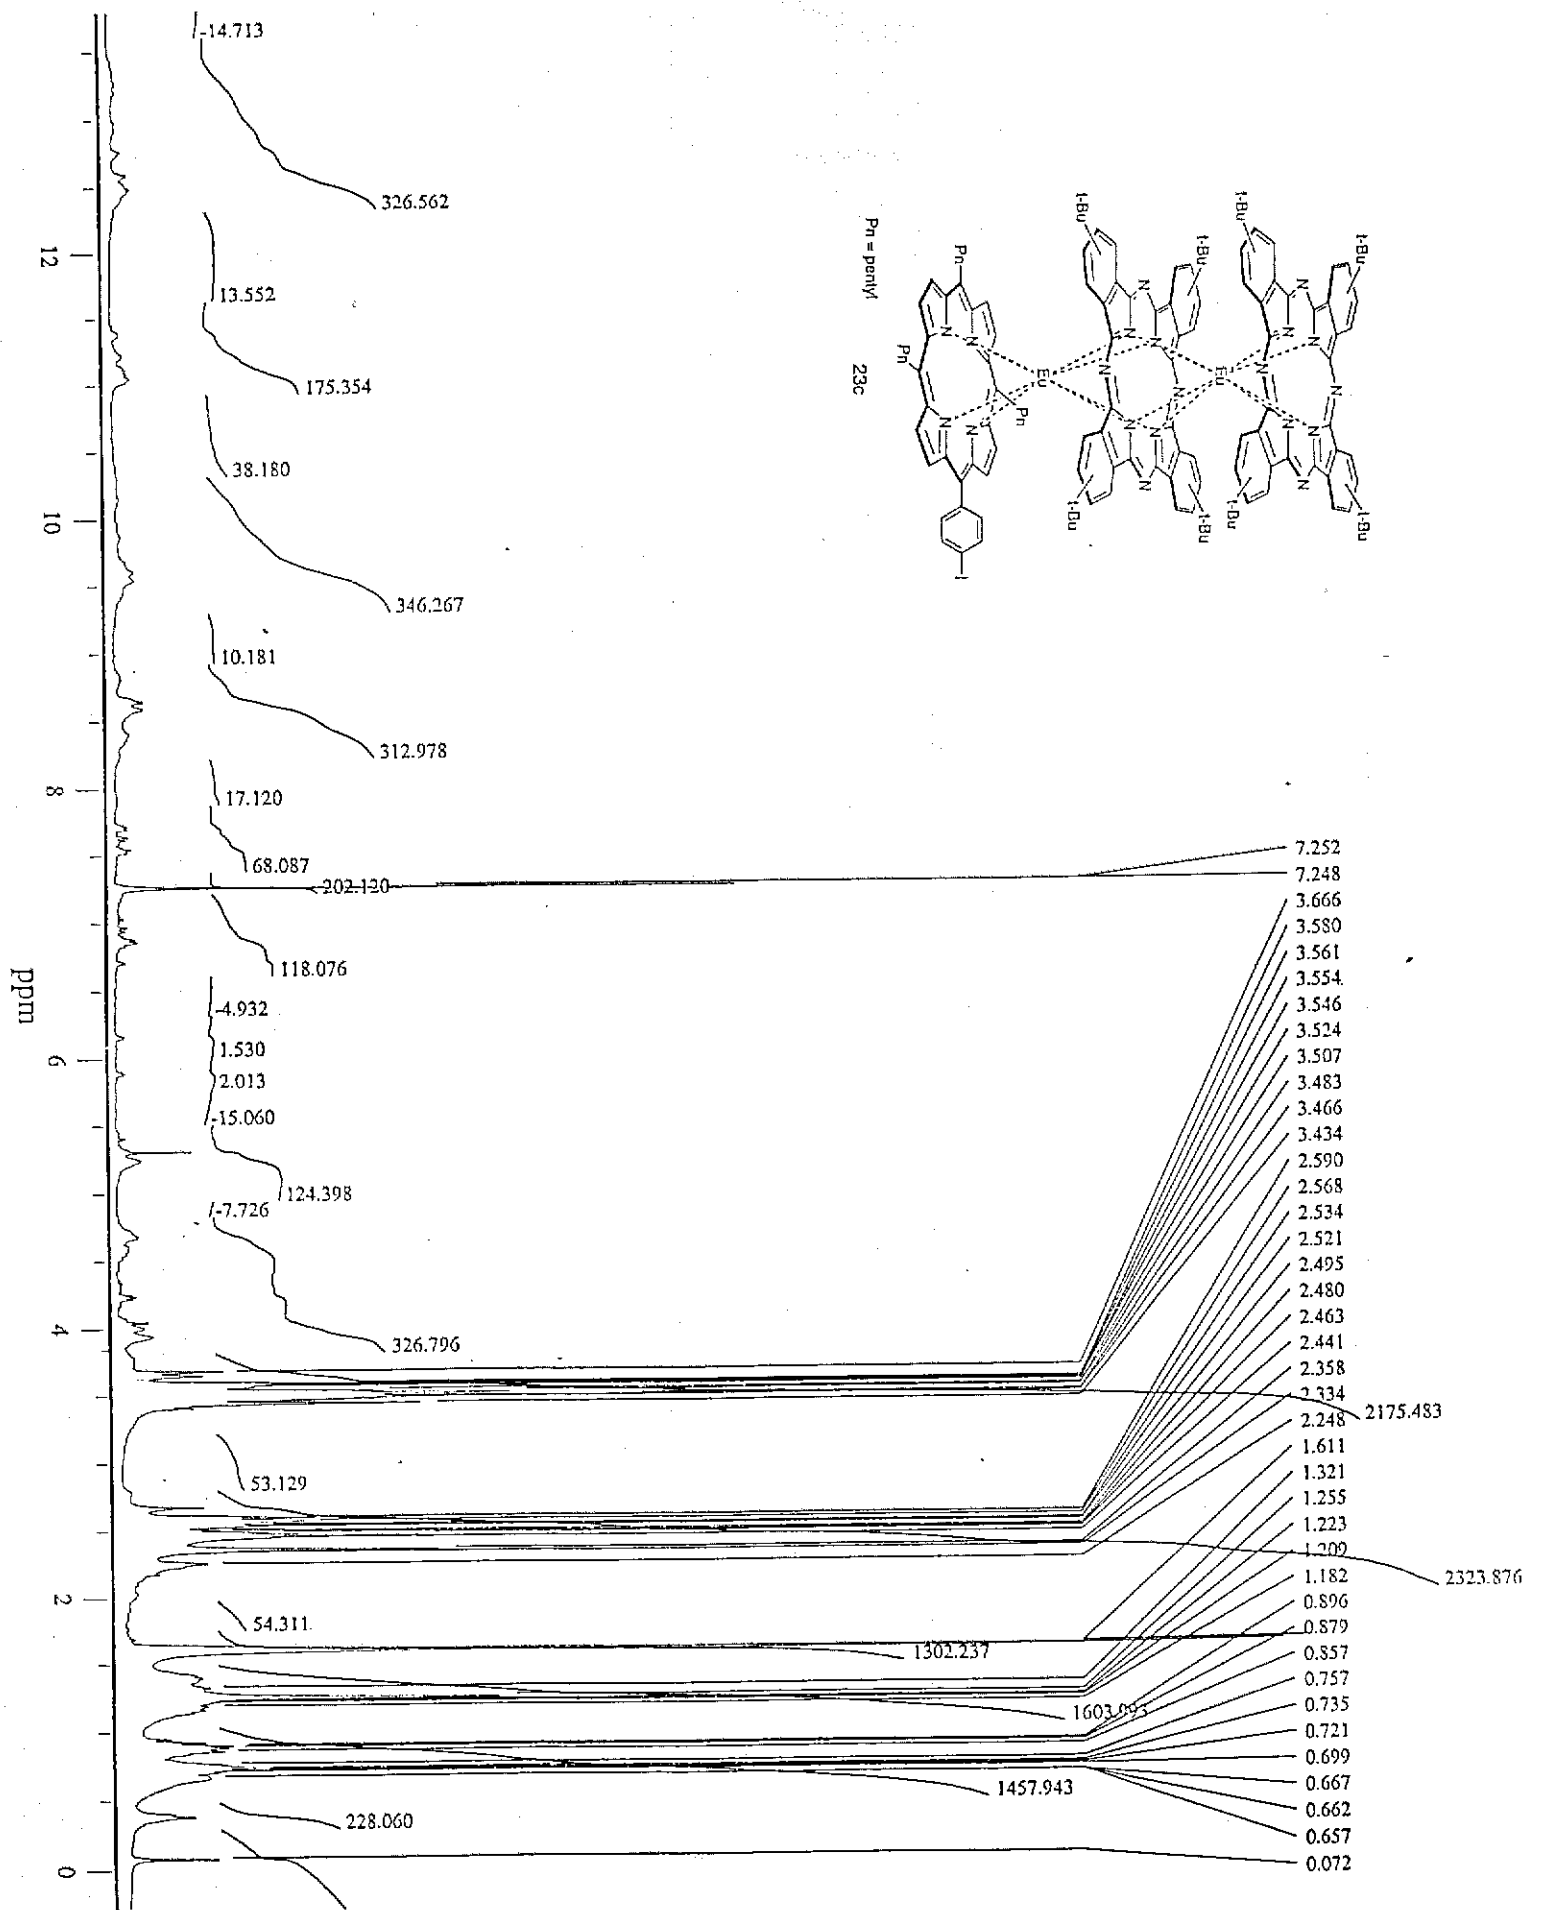

Method file : <untitled>  
Information : Default Method  
Data File : <untitled>

## Overlaid Spectra:

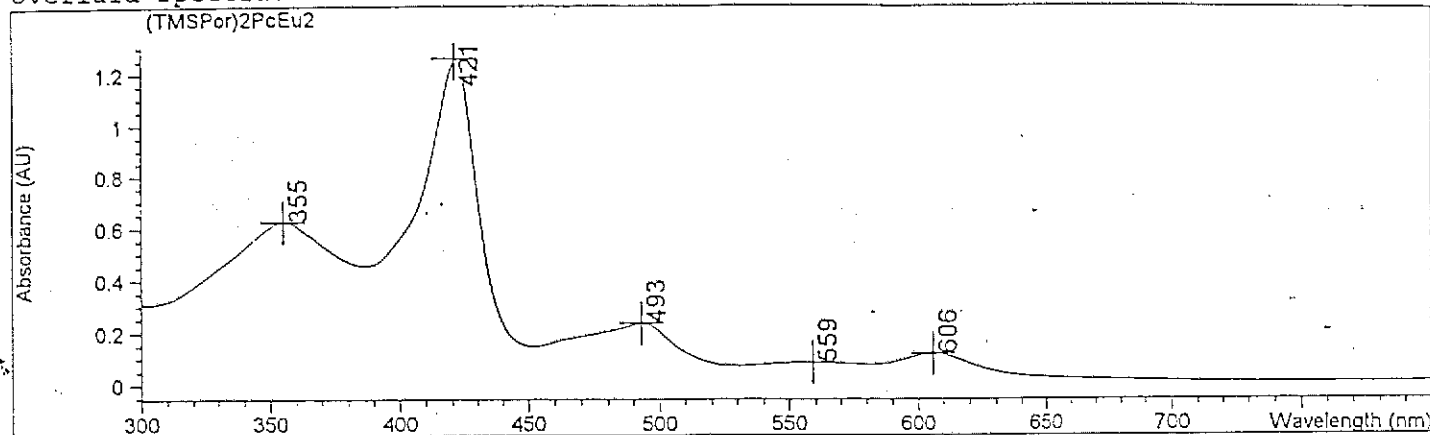

| # | Name           | Peaks (nm) | Abs (AU)  |
|---|----------------|------------|-----------|
| 1 | (TMSPor)2PcEu2 | 421.0      | 1.25890   |
| 1 |                | 355.0      | 0.62666   |
| 1 |                | 493.0      | 0.23762   |
| 1 |                | 606.0      | 0.12098   |
| 1 |                | 559.0      | 8.7262E-2 |
| 1 |                | ***        | ***       |

Report generated by :

Signature: .....

\*\*\* End Spectrum/Peak Report \*\*\*

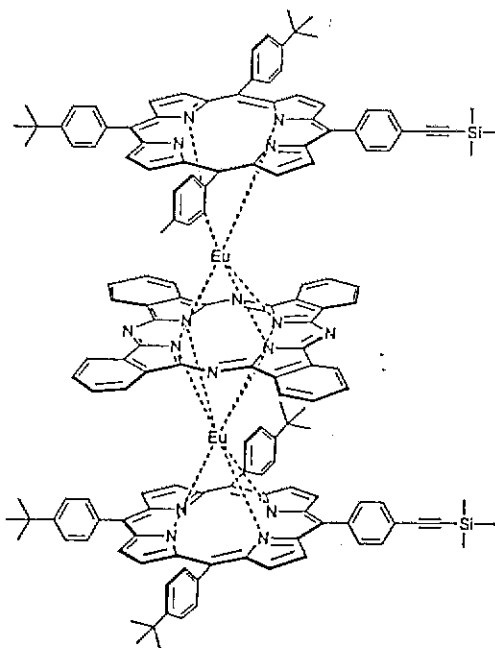



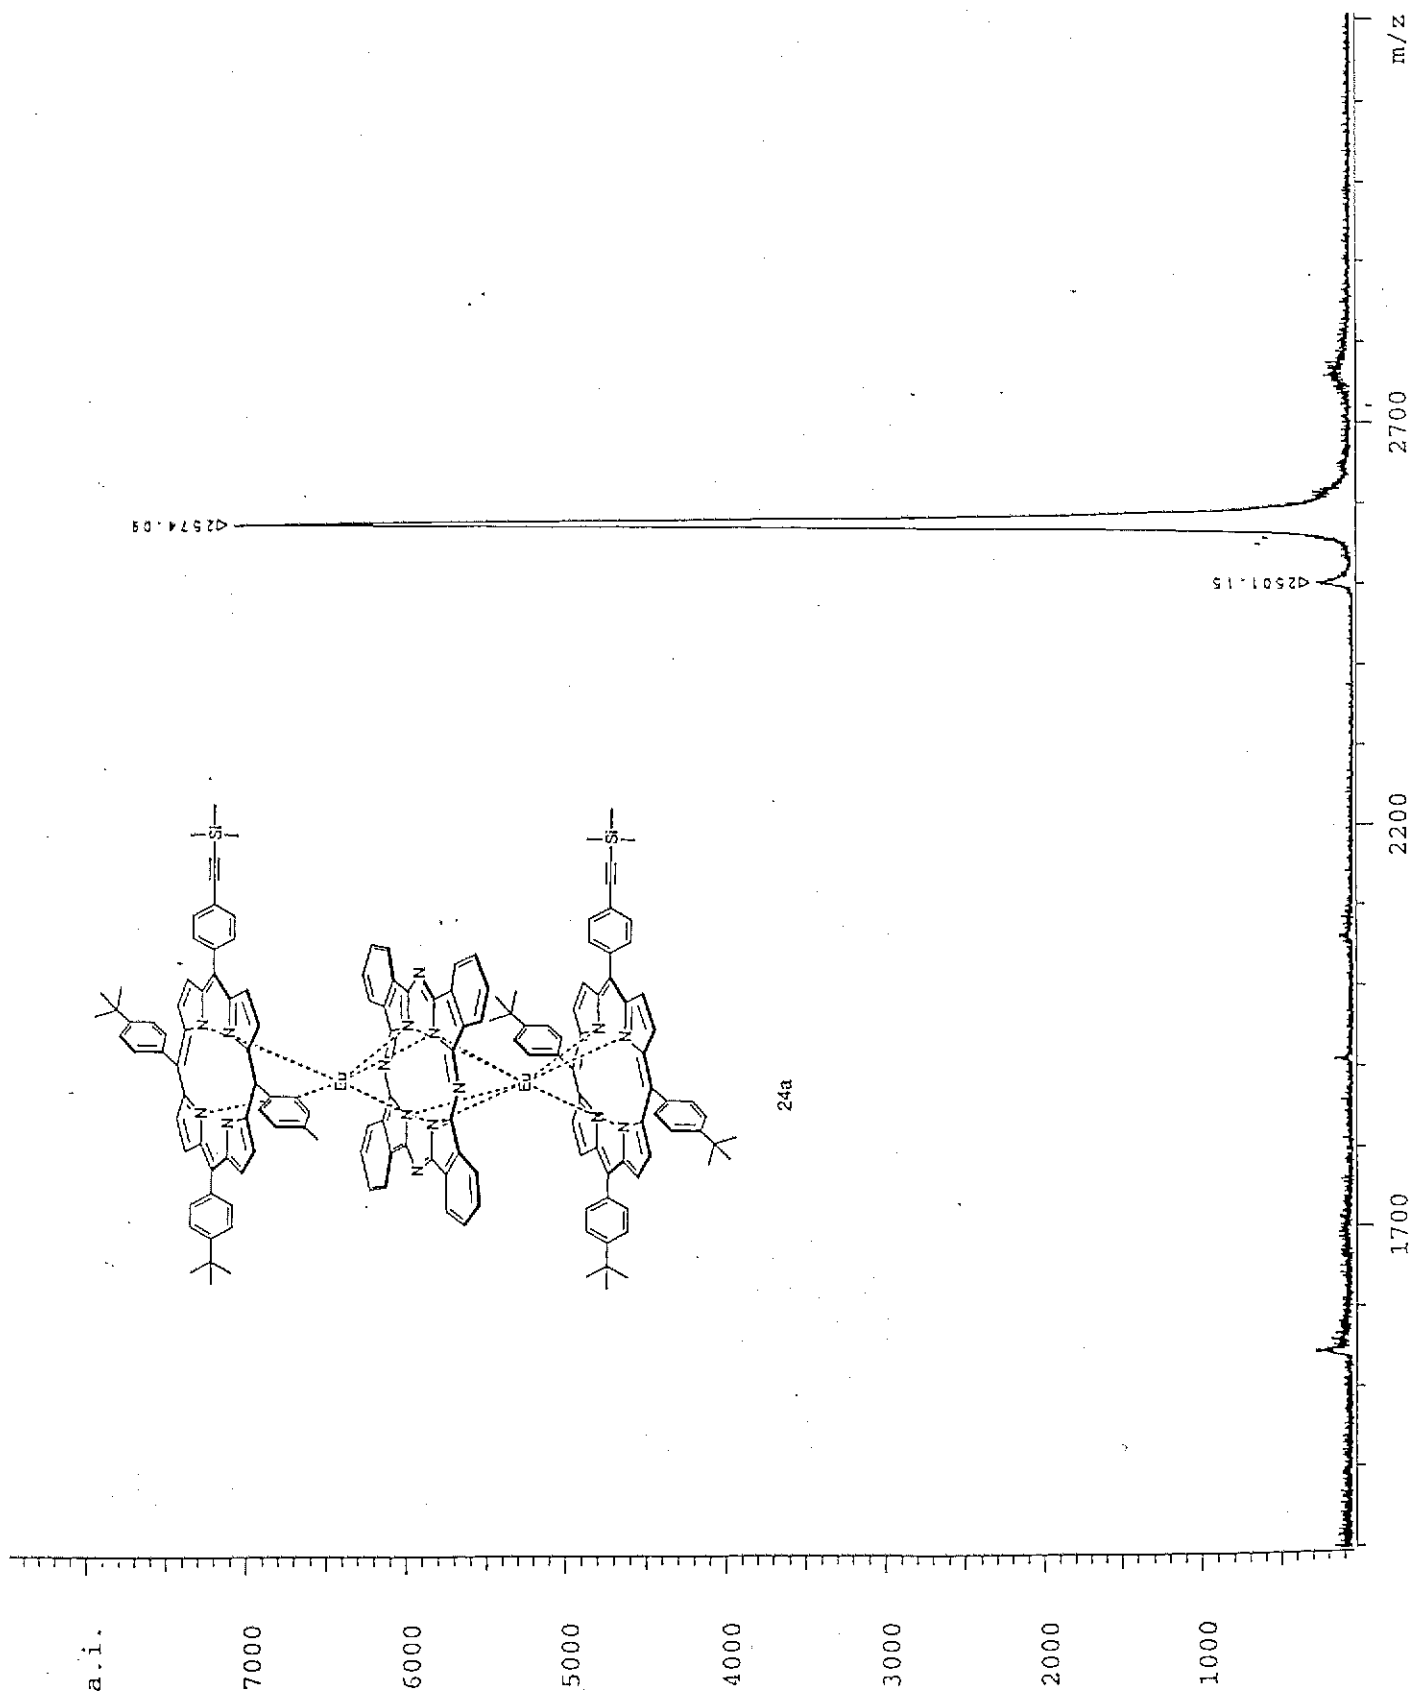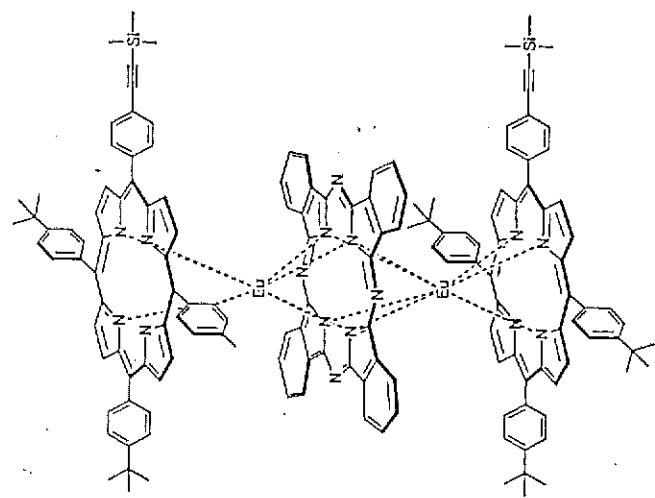

24a

/data/chemistry/LINDSEY/JUNZHONG/994264/1SRef/pdata/1 unknown Thu Oct 21 11:16:25 1999

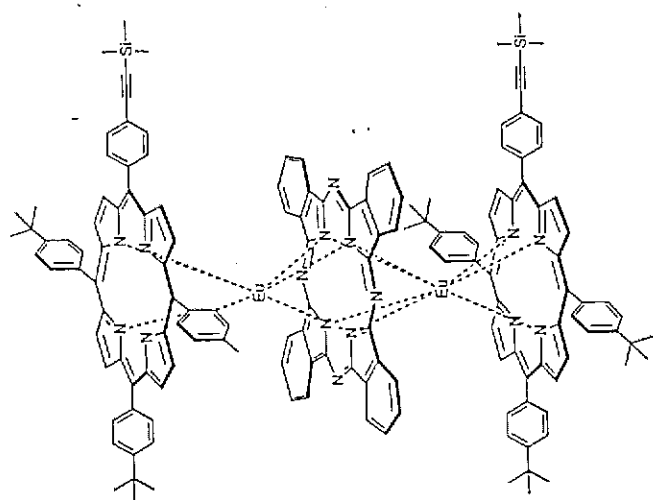

24a

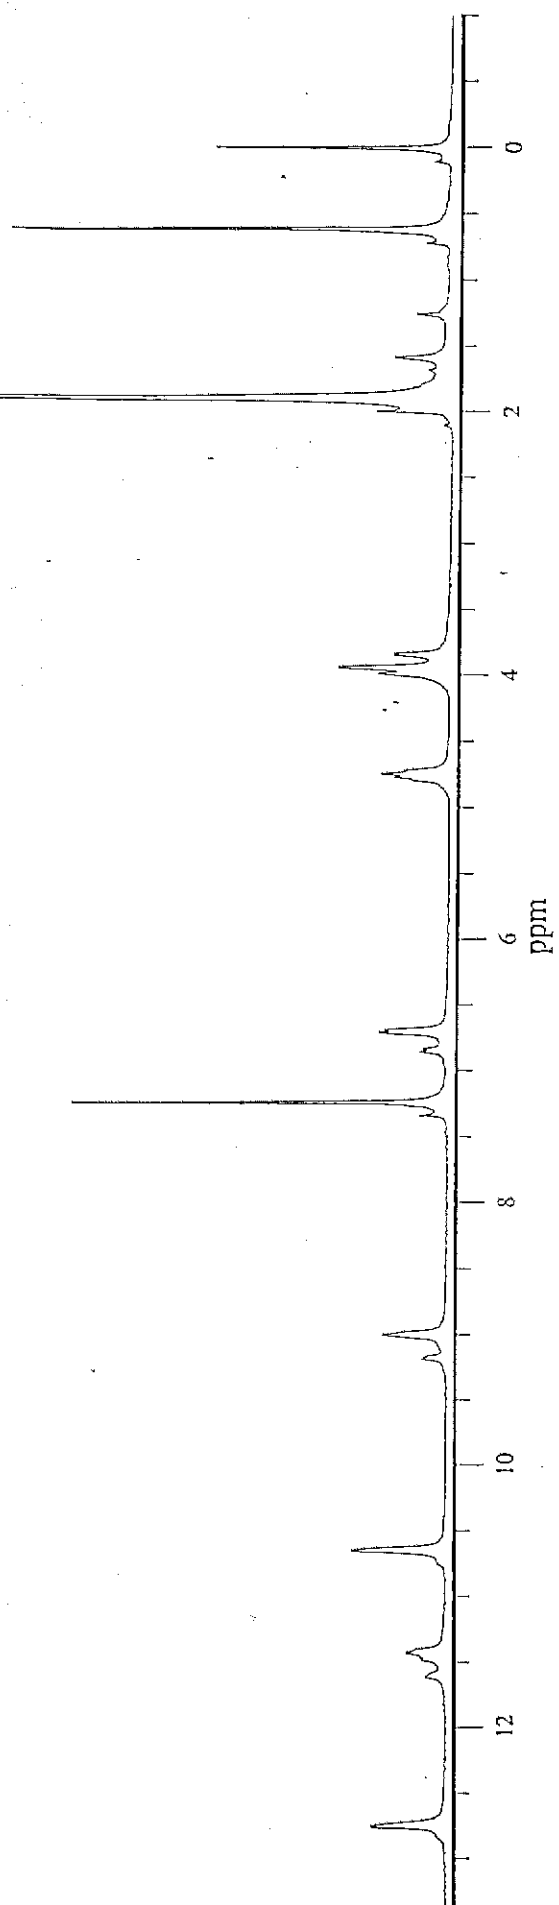

Supplement: b008224o8.pdf [file b008224o8.pdf]
