# Supplementary material for: Studies related to the design and synthesis of a molecular octal counter
Source: Royal Society of Chemistry journal article supplement (doi:10.1039/b008224o), 2001-01-01

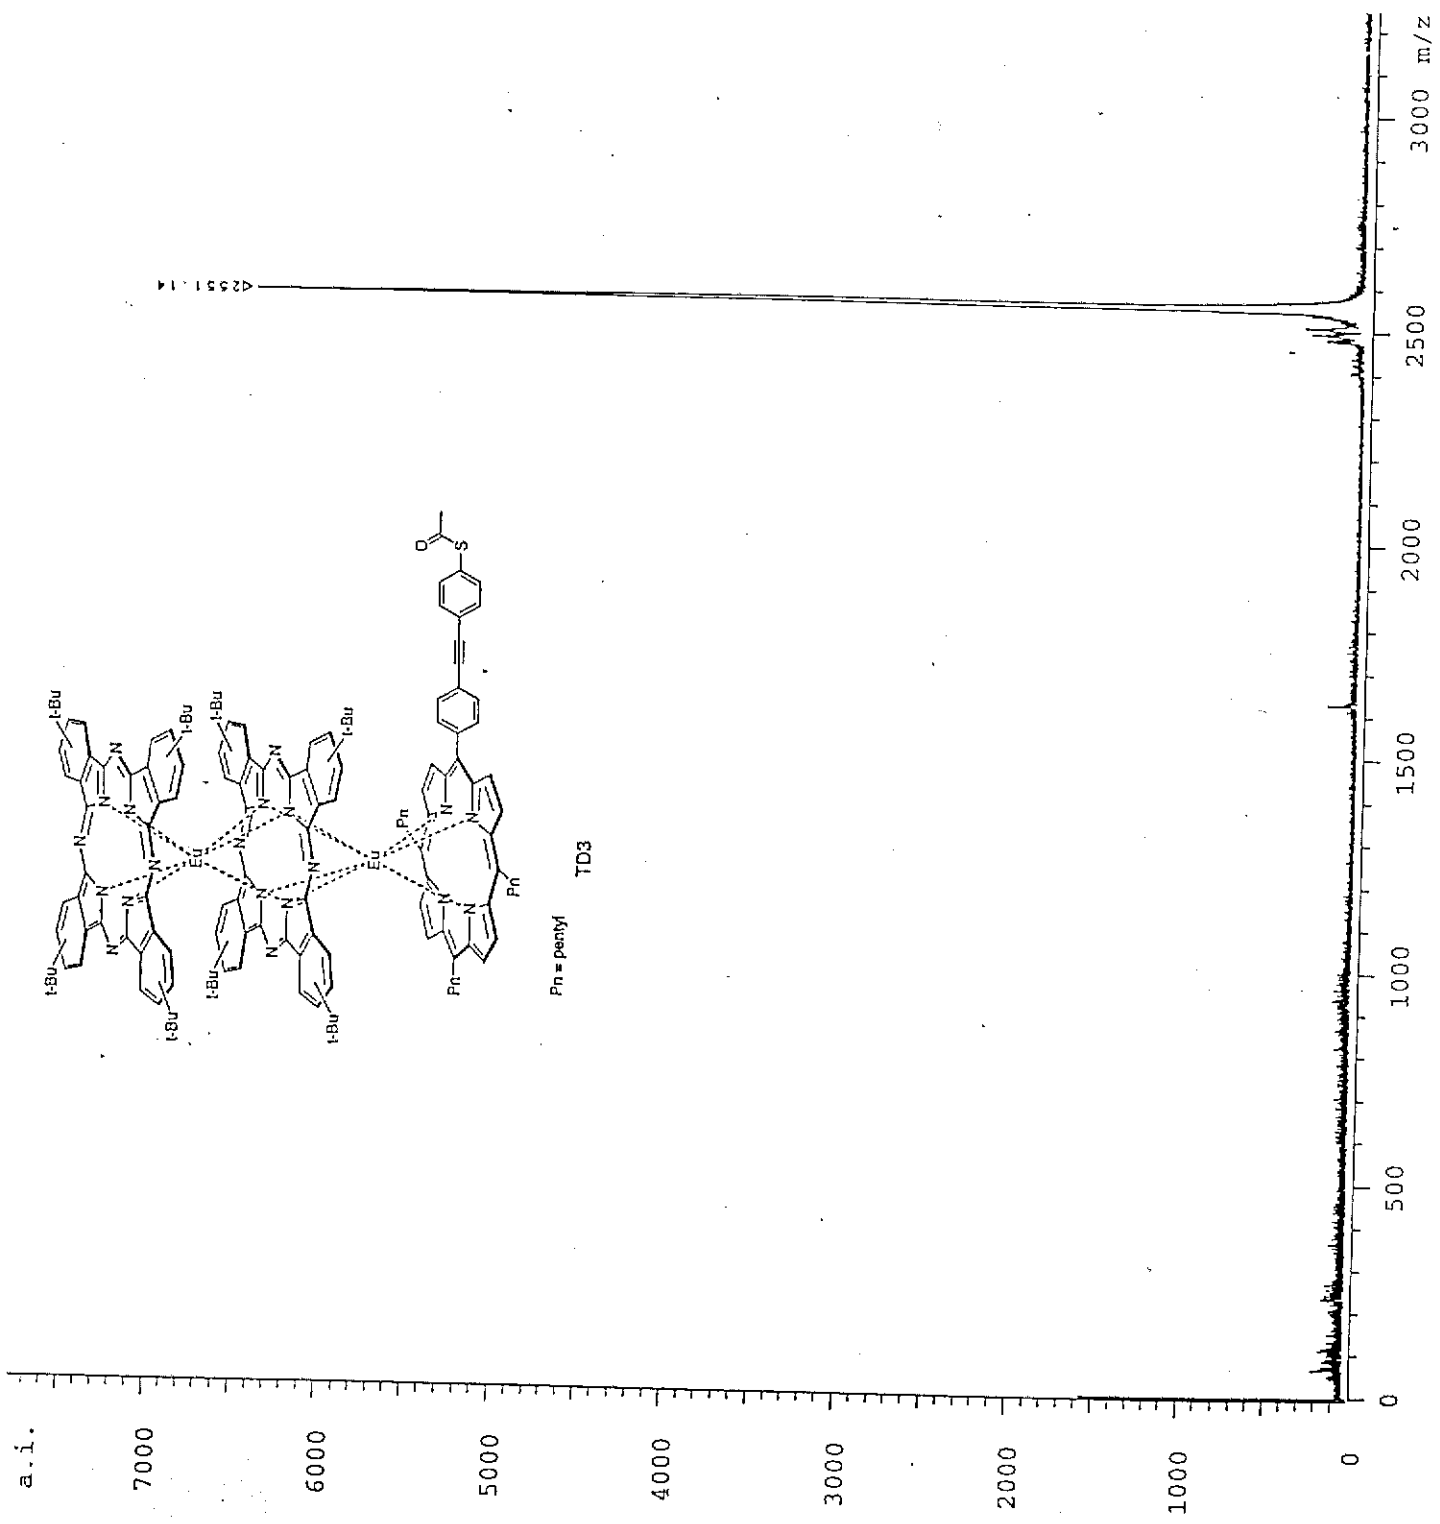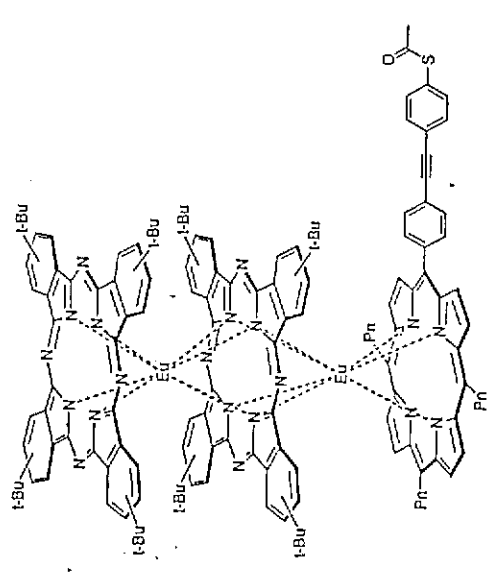

Pn = pentyl  
TD3

Method file : <untitled>  
Information : Default Method  
Data File : C:\HPCHEM\1\DATA\JUNZHONG\S-TD-2.SD Created : 1/11/00  
15:18:20

## Overlaid Spectra:

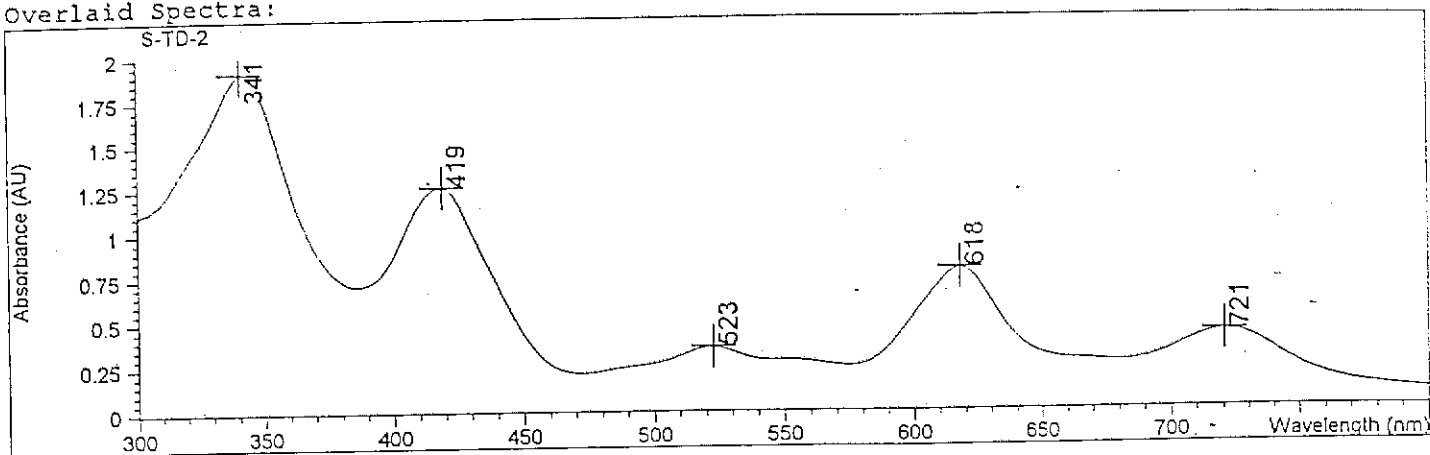

| # | Name   | Peaks (nm) | Abs (AU) |
|---|--------|------------|----------|
| 1 | S-TD-2 | 341.0      | 1.91350  |
| 1 |        | 419.0      | 1.26210  |
| 1 |        | 618.0      | 0.78951  |
| 1 |        | 721.0      | 0.42677  |
| 1 |        | 523.0      | 0.35579  |
| 1 |        | ***        | ***      |

Report generated by :

Signature: .....

\*\*\* End Spectrum/Peak Report \*\*\*

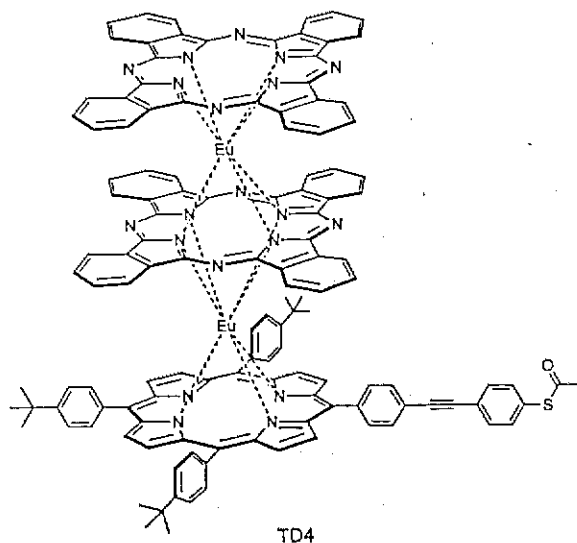



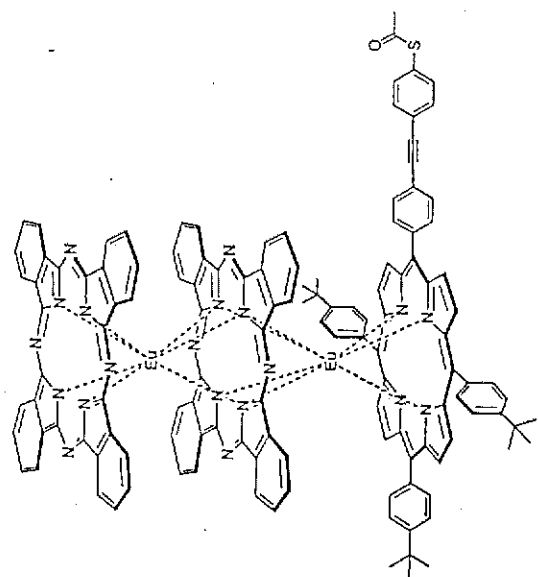

Overlaid Spectra:

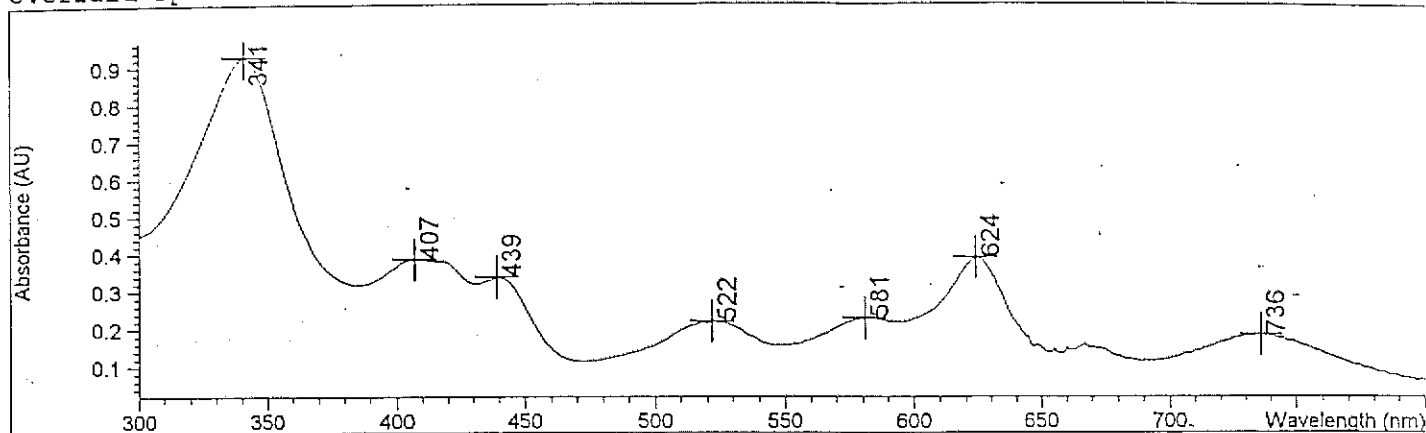

| # | Name | Peaks (nm) | Abs (AU) |
|---|------|------------|----------|
| 1 |      | 341.0      | 0.92760  |
| 1 |      | 624.0      | 0.38972  |
| 1 |      | 407.0      | 0.38667  |
| 1 |      | 439.0      | 0.33893  |
| 1 |      | 581.0      | 0.23009  |
| 1 |      | 522.0      | 0.22094  |
| 1 |      | 736.0      | 0.18483  |

Report generated by :

Signature: .....

\*\*\* End Spectrum/Peak Report \*\*\*

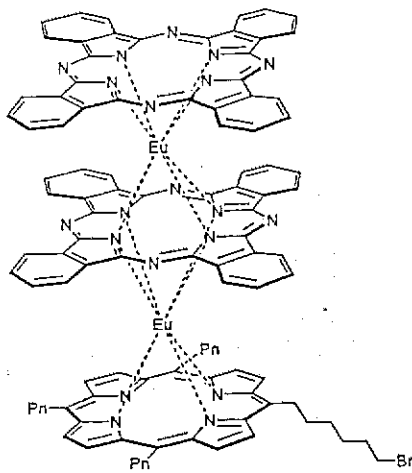

Pn = pentyl

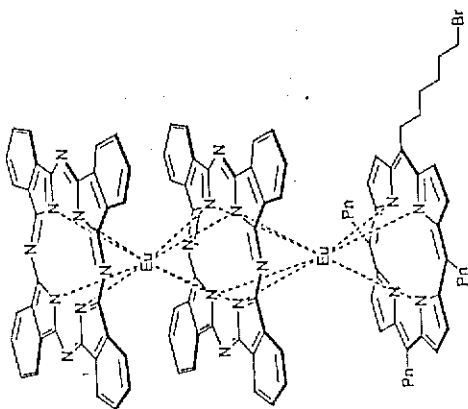

Ph = pentyl

29c

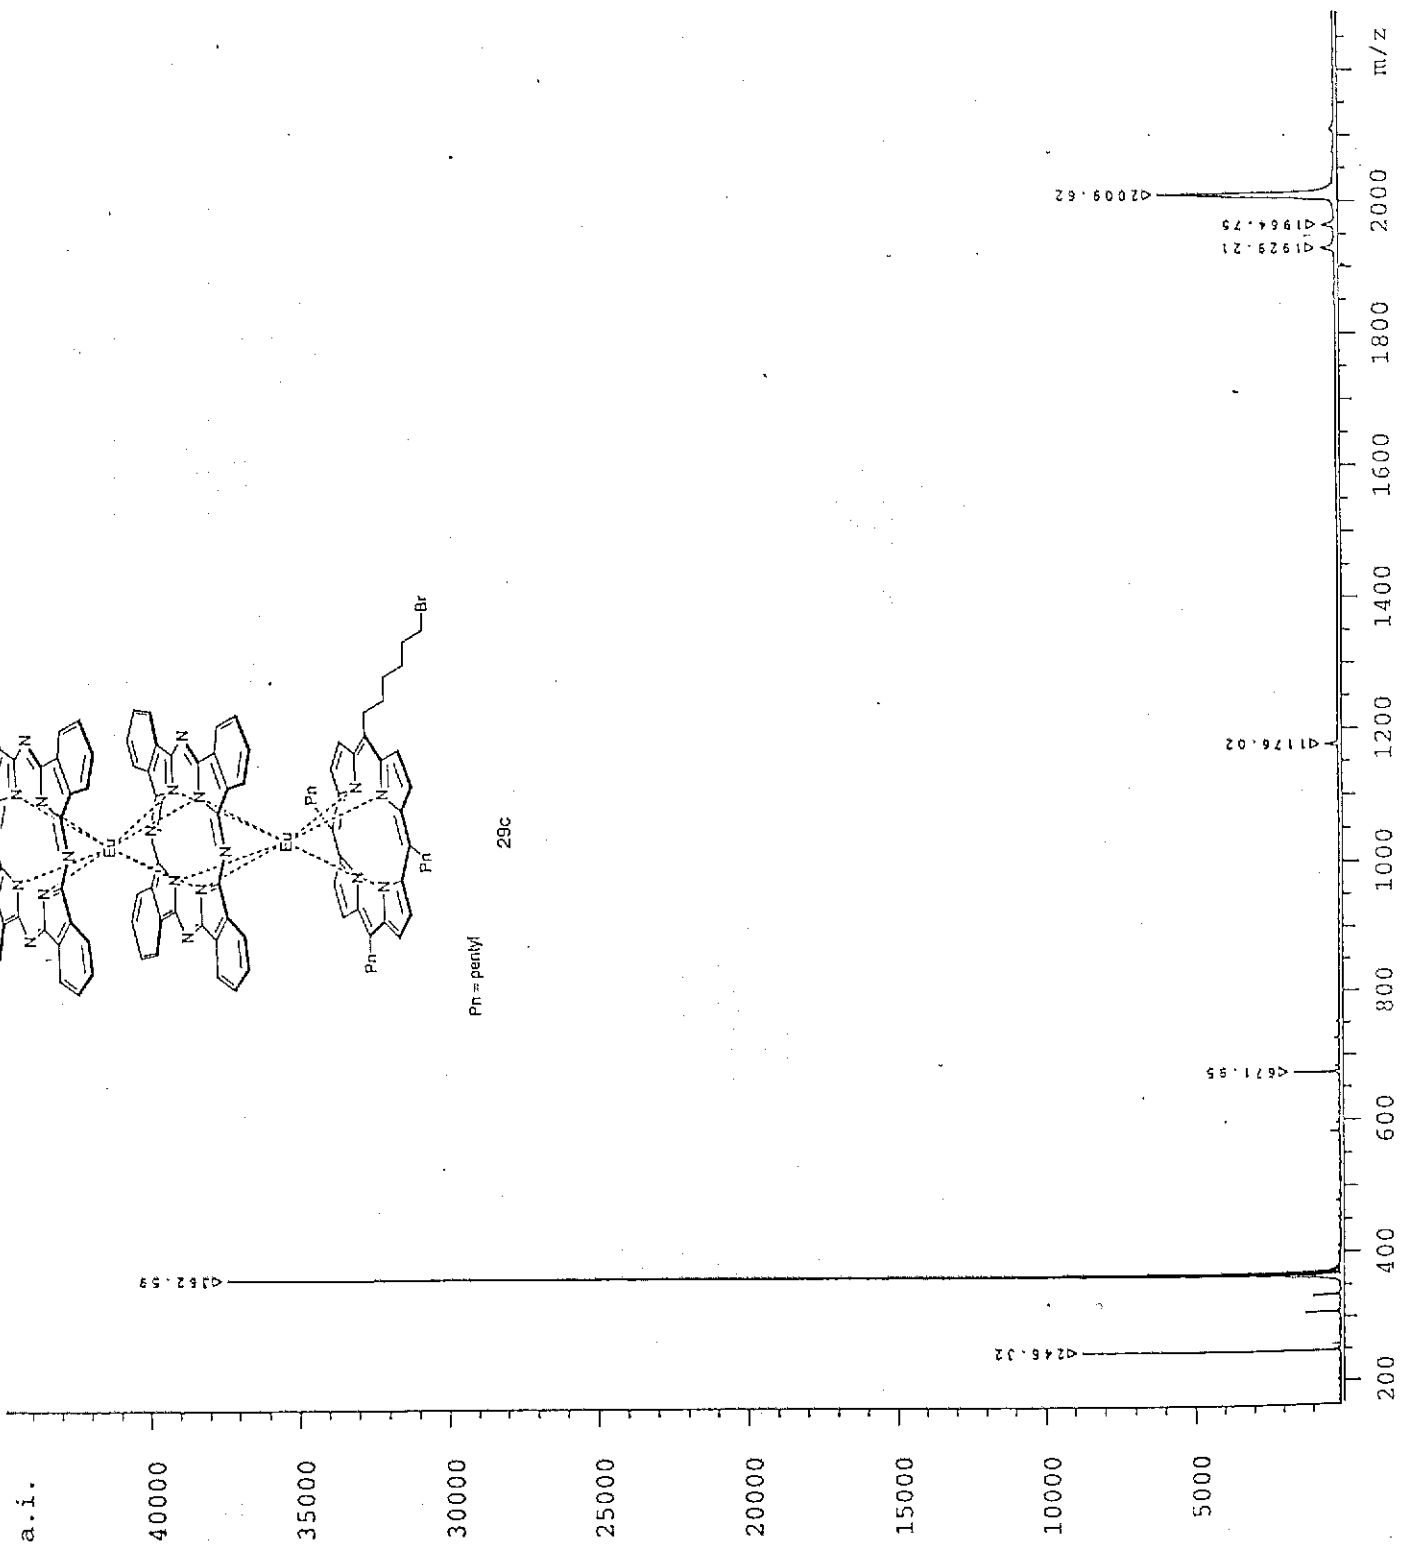

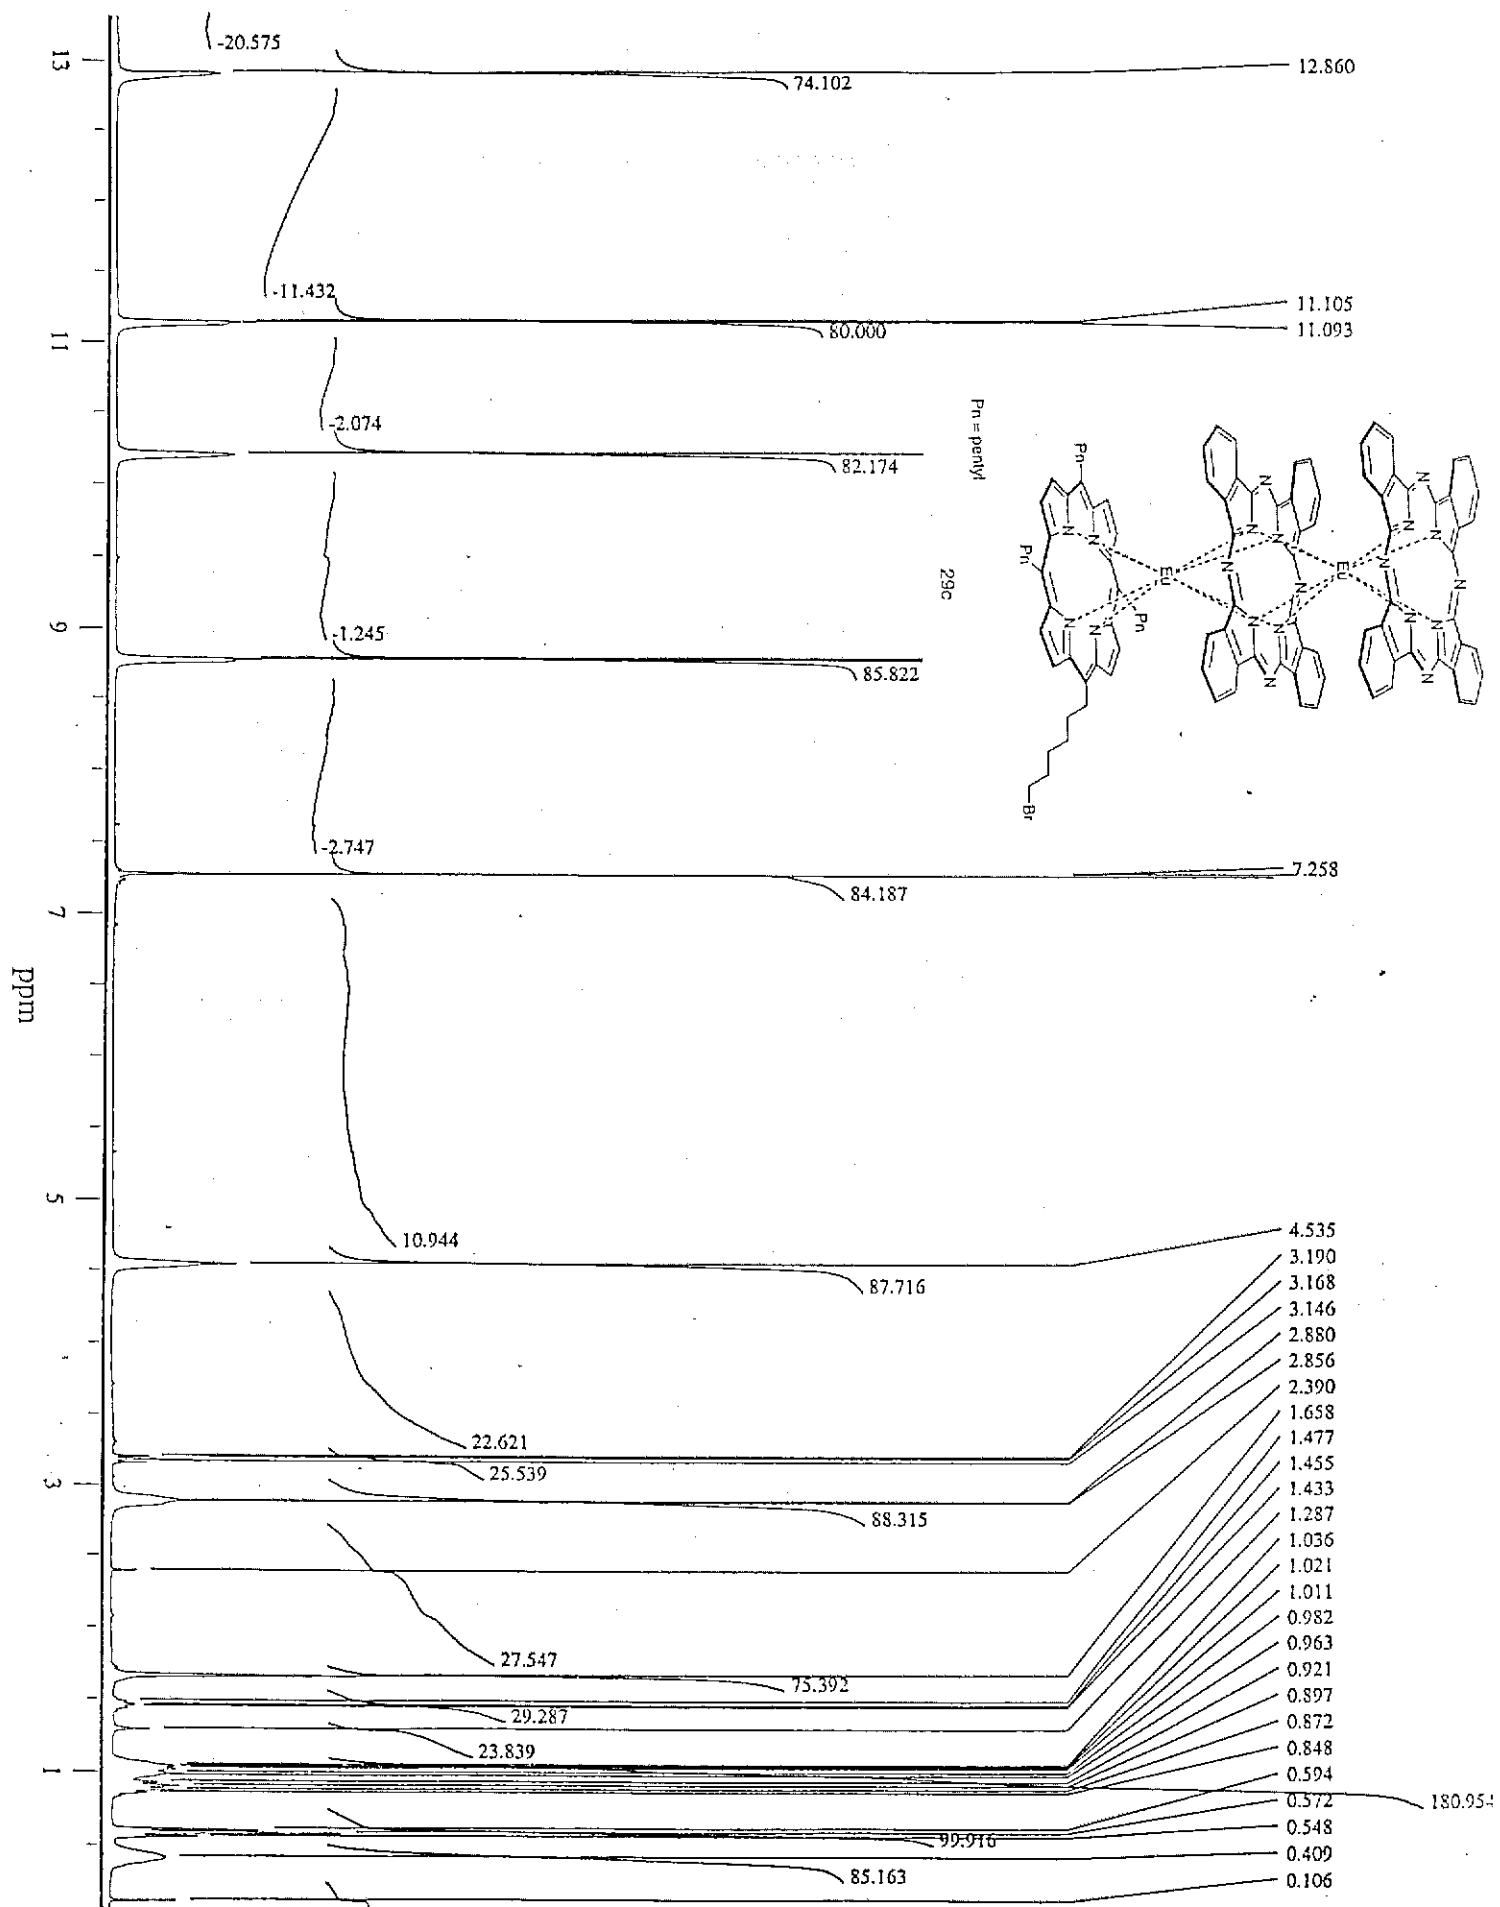

Overlaid Spectra:

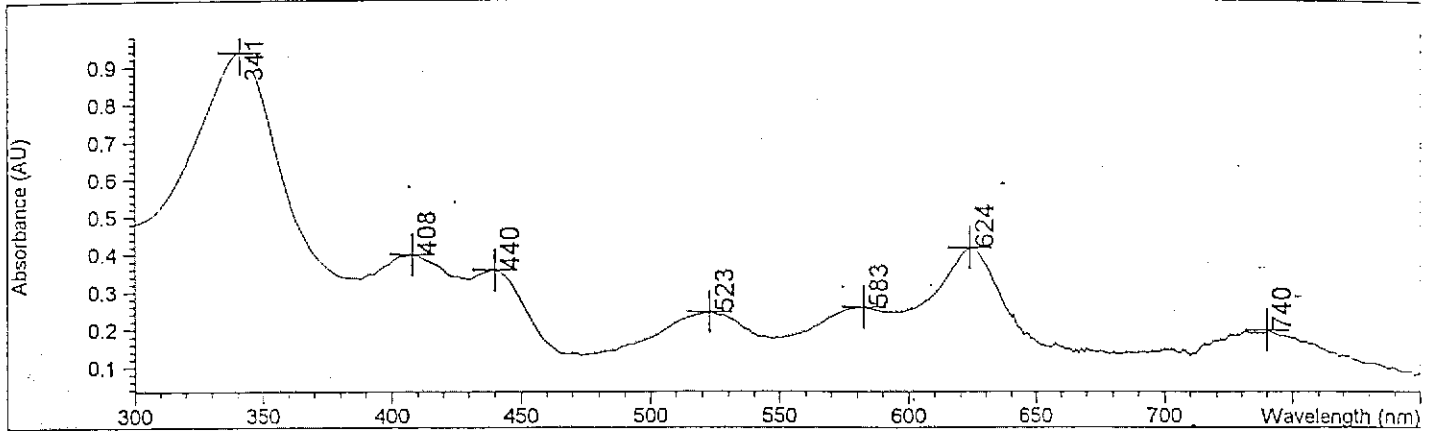

| # | Name | Peaks (nm) | Abs (AU) |
|---|------|------------|----------|
| 1 |      | 341.0      | 0.93751  |
| 1 |      | 624.0      | 0.41589  |
| 1 |      | 408.0      | 0.39994  |
| 1 |      | 440.0      | 0.35922  |
| 1 |      | 583.0      | 0.25847  |
| 1 |      | 523.0      | 0.24498  |
| 1 |      | 740.0      | 0.19618  |

Report generated by :

Signature: .....

\*\*\* End Spectrum/Peak Report \*\*\*

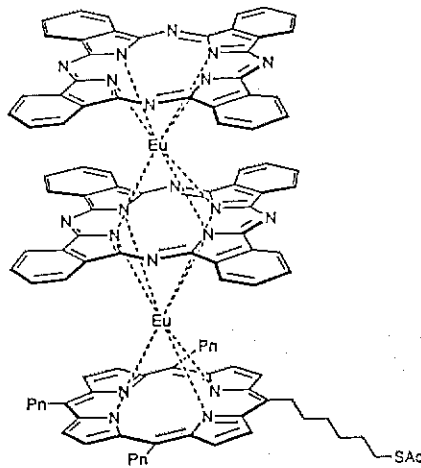

Pn = pentyl

TD5



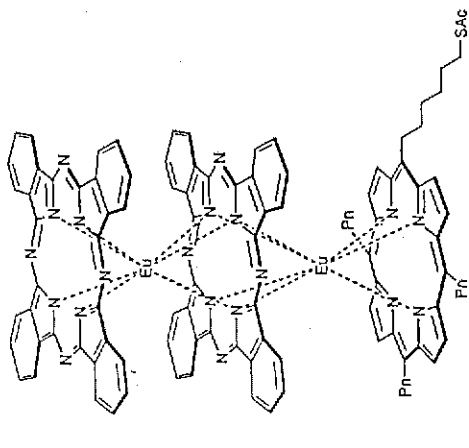

Pn = pentyl

TD5

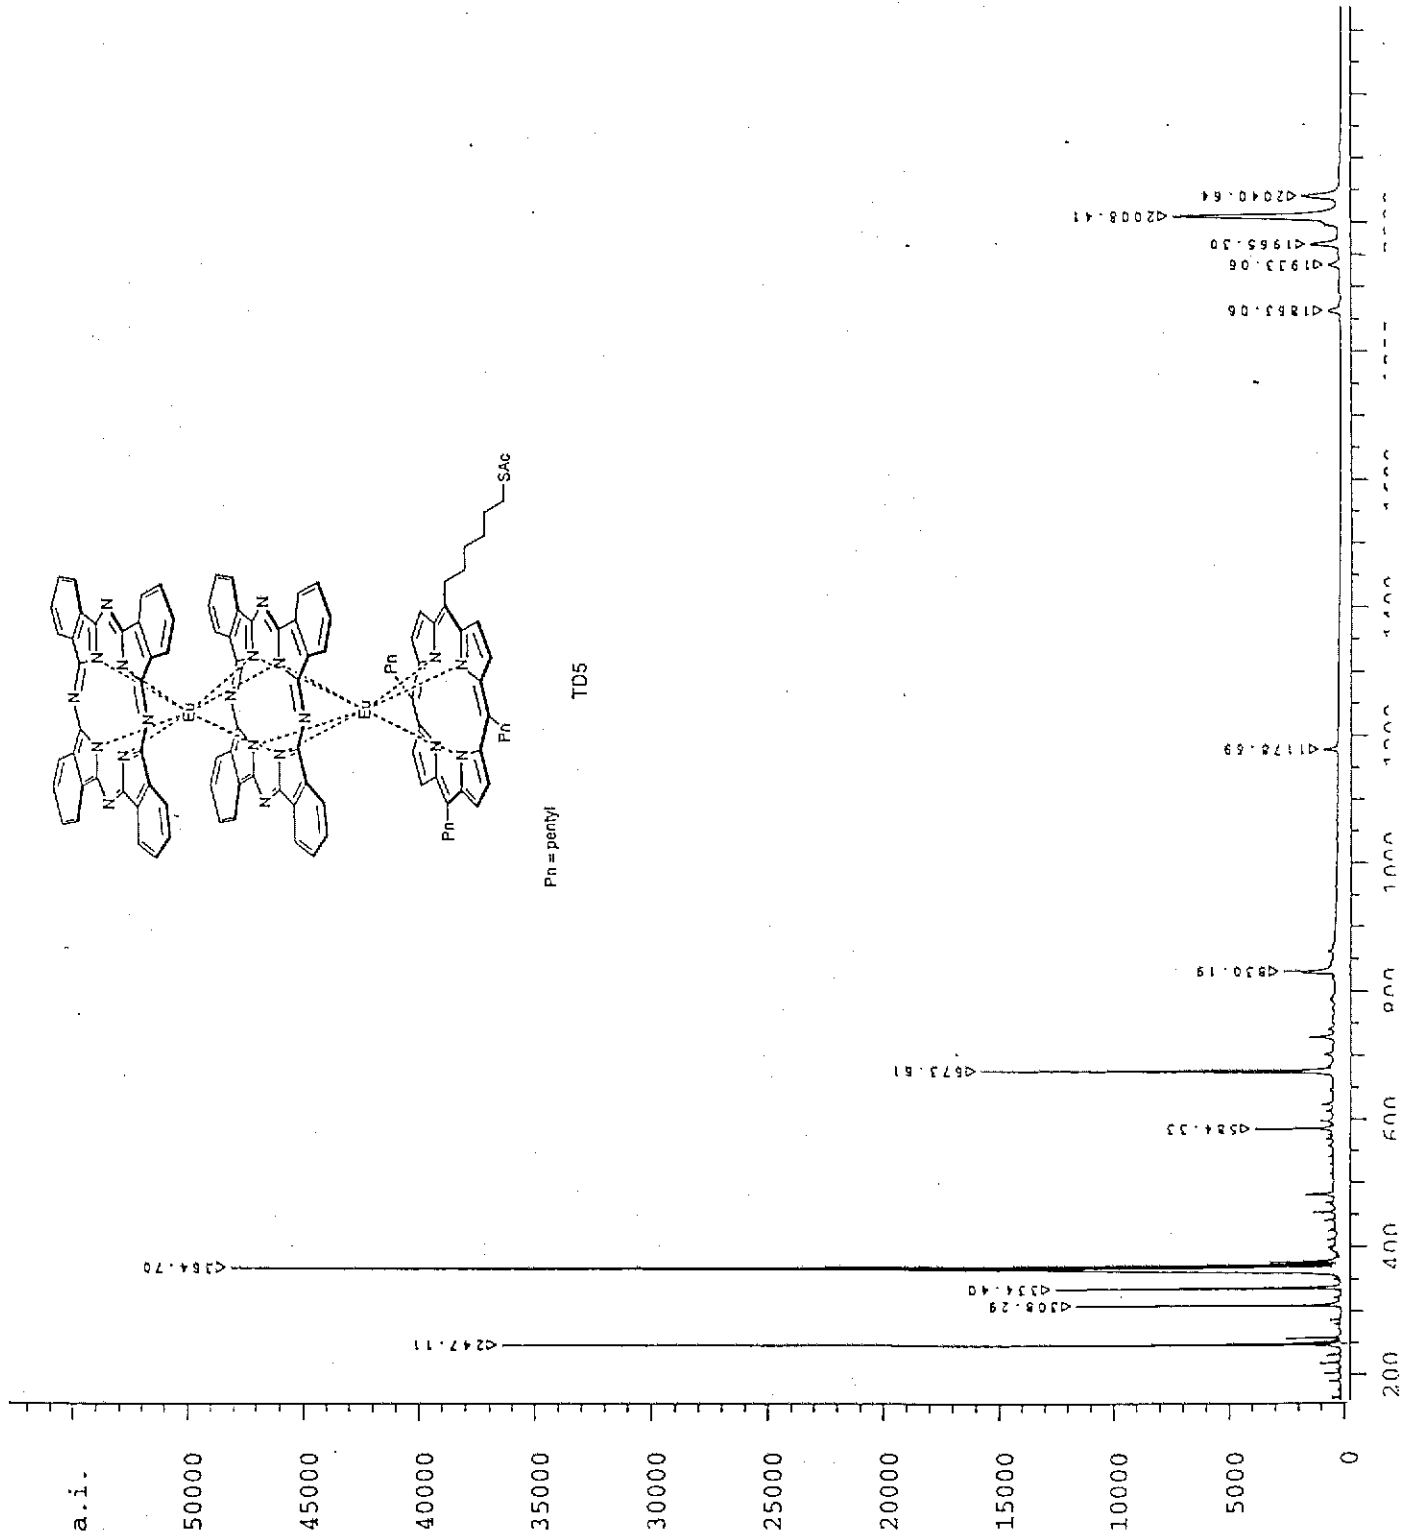

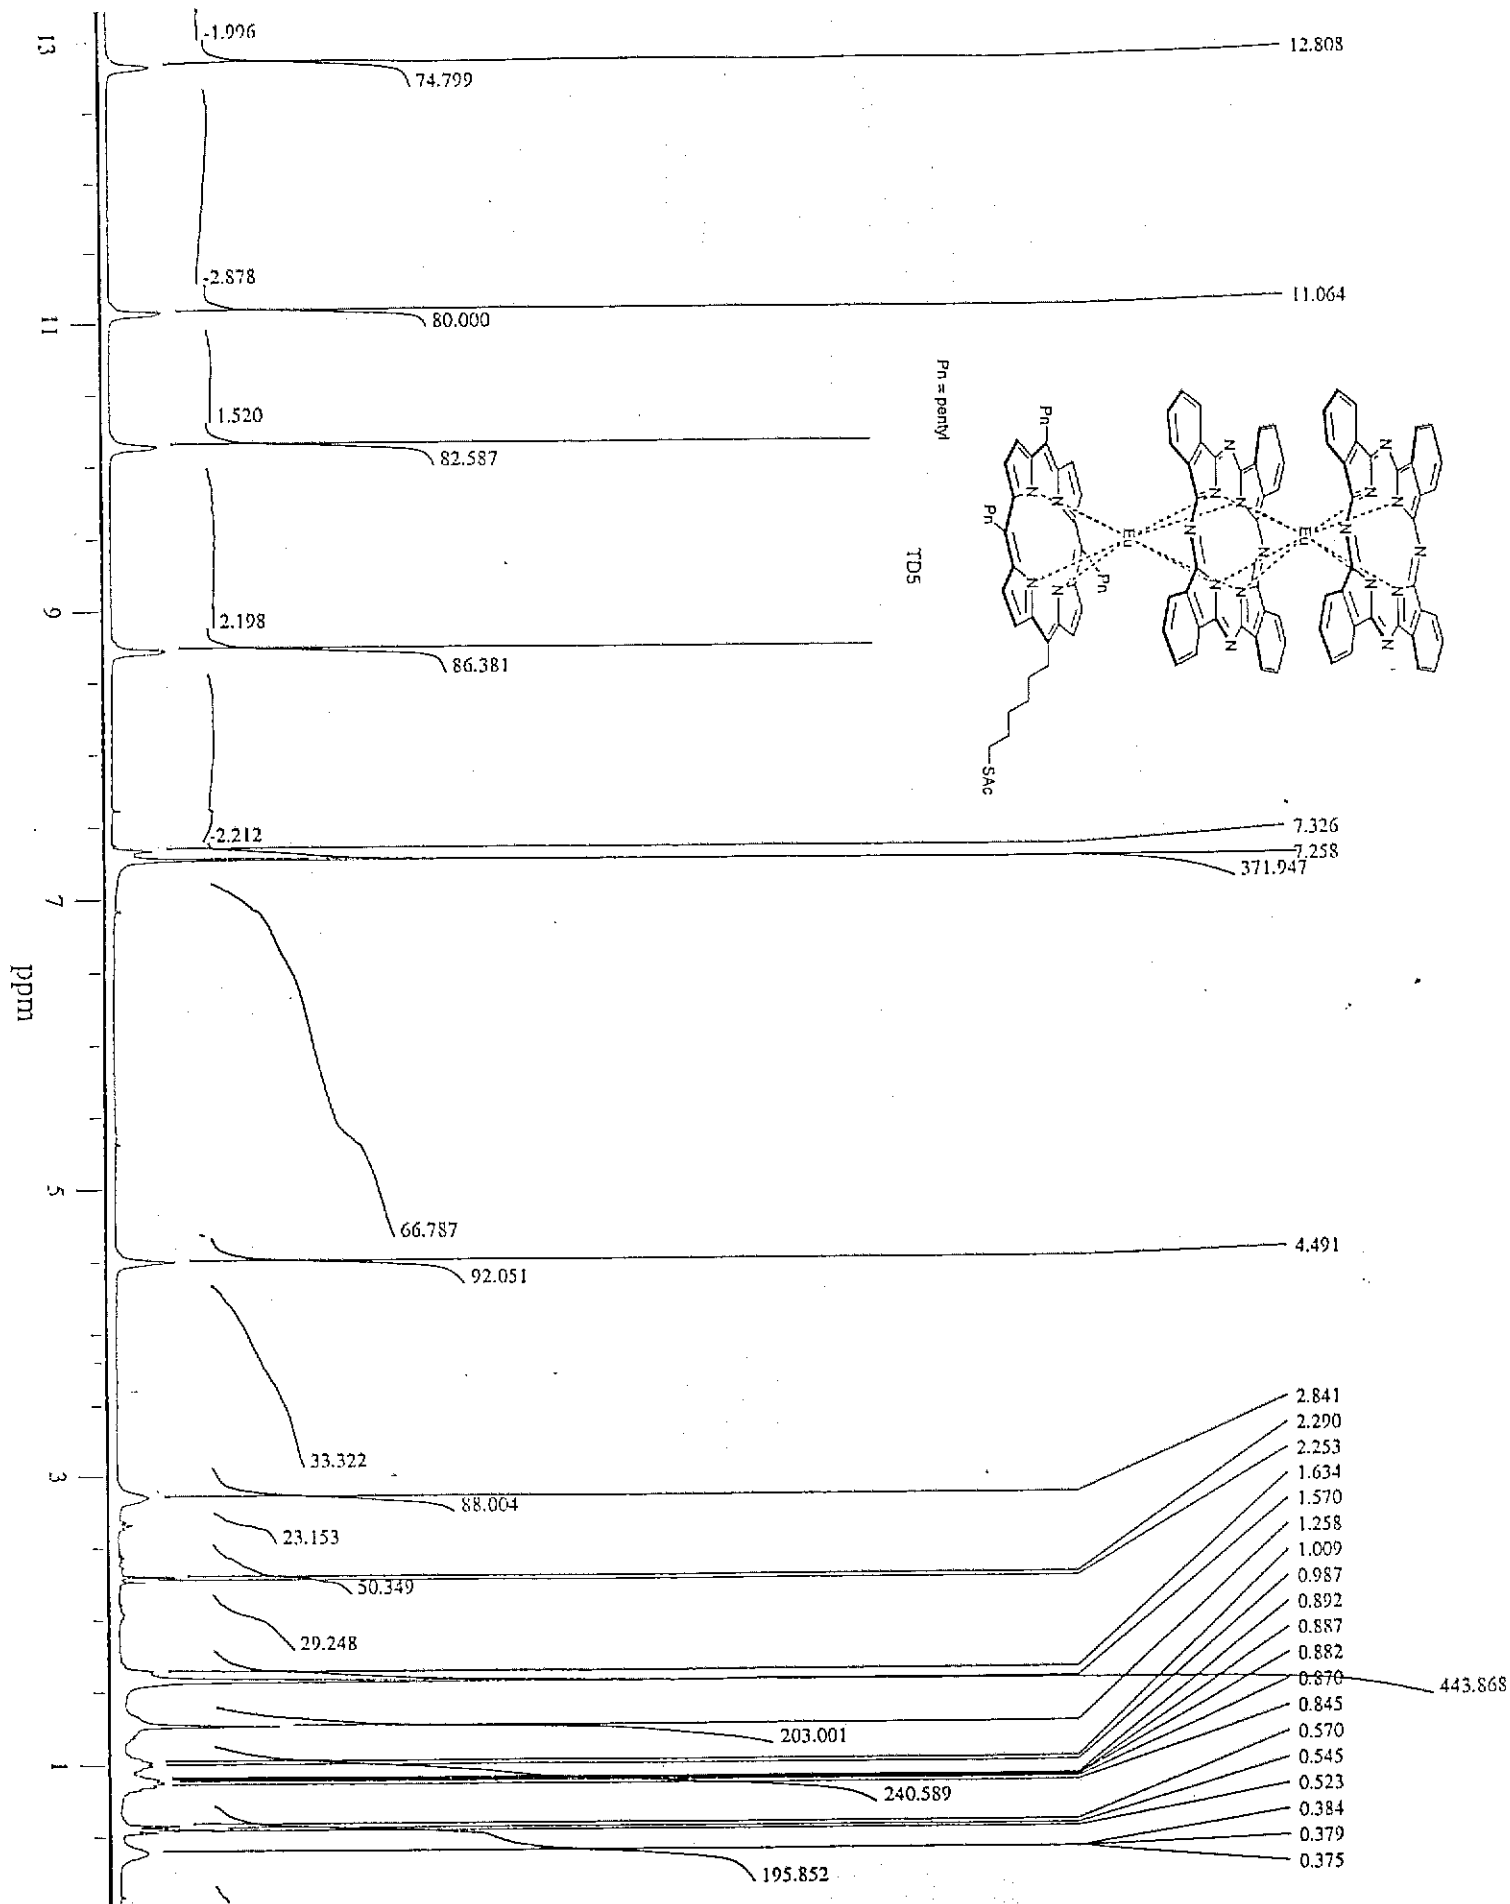

Supplement: b008224o10.pdf [file b008224o10.pdf]
