# Supplementary material for: Studies related to the design and synthesis of a molecular octal counter
Source: Royal Society of Chemistry journal article supplement (doi:10.1039/b008224o), 2001-01-01
Supplement: b008224o2.pdf [file b008224o2.pdf]

Overlaid Spectra:

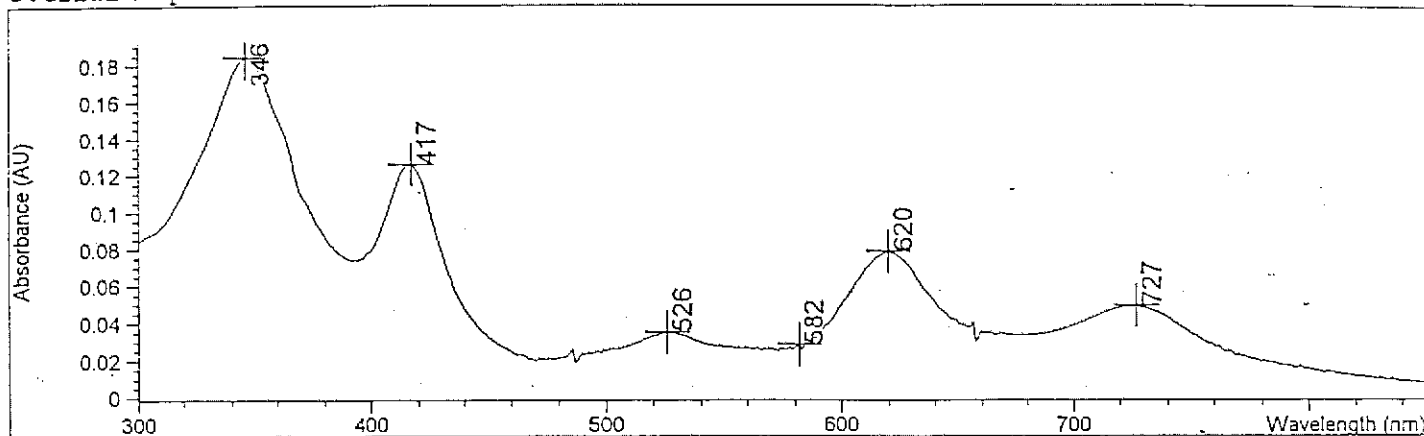

| # | Name | Peaks (nm) | Abs (AU)  |
|---|------|------------|-----------|
| 1 |      | 346.0      | 0.18423   |
| 1 |      | 417.0      | 0.12604   |
| 1 |      | 620.0      | 7.8963E-2 |
| 1 |      | 727.0      | 4.9331E-2 |
| 1 |      | 526.0      | 3.5056E-2 |
| 1 |      | 582.0      | 2.8741E-2 |

Report generated by :

Signature: .....

\*\*\* End Spectrum/Peak Report \*\*\*

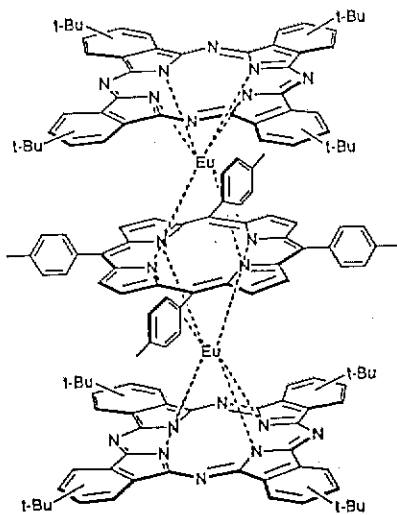

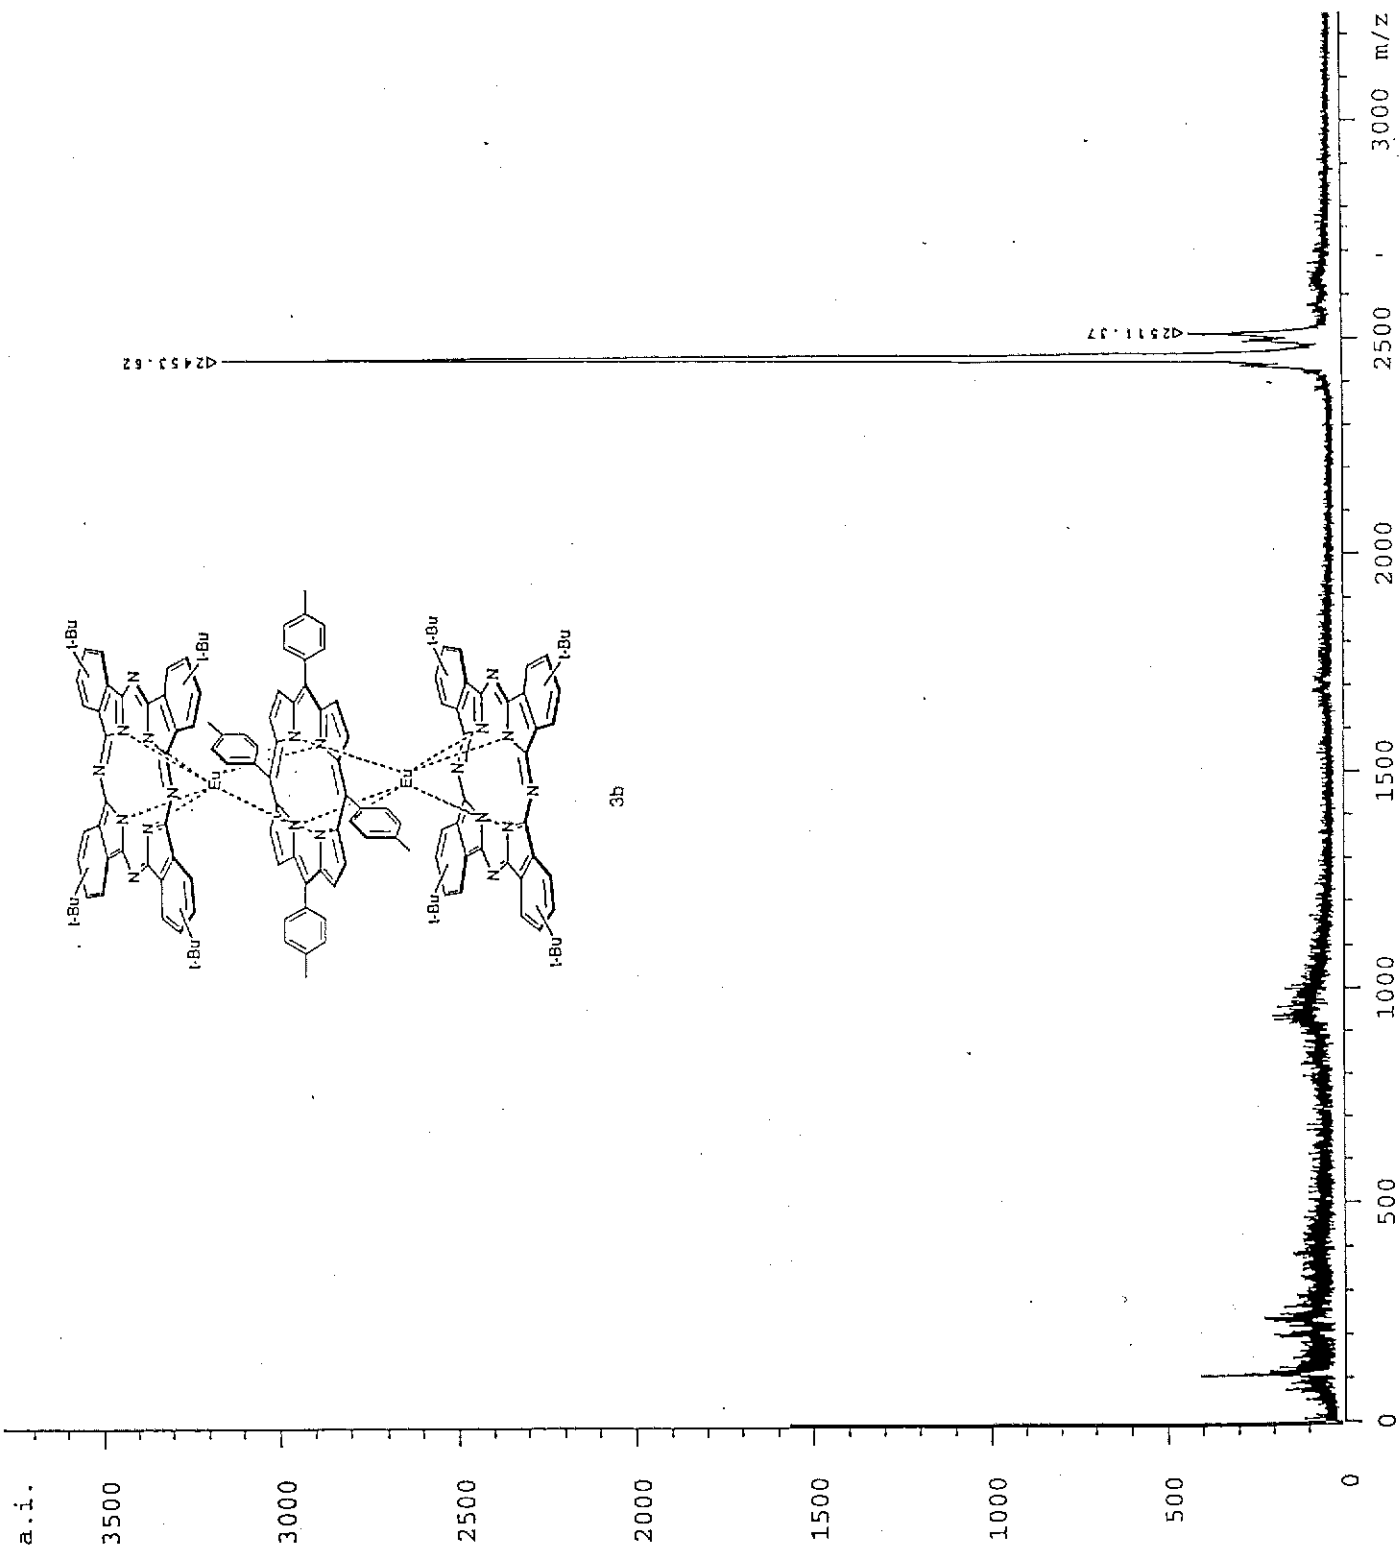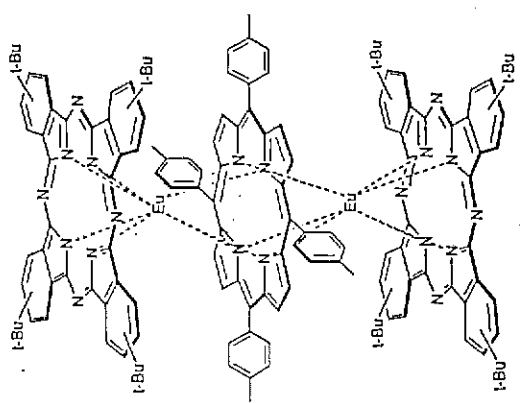

3b

Overlaid Spectra:

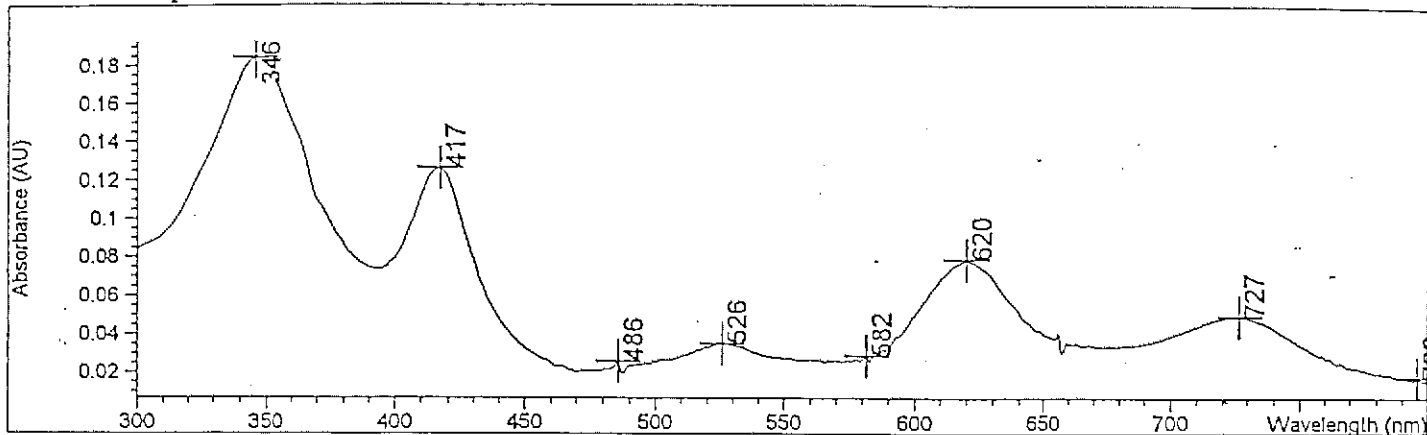

| # | Name | Peaks (nm) | Abs (AU)  |
|---|------|------------|-----------|
| 1 |      | 346.0      | 0.18423   |
| 1 |      | 417.0      | 0.12604   |
| 1 |      | 620.0      | 7.8963E-2 |
| 1 |      | 727.0      | 4.9331E-2 |
| 1 |      | 526.0      | 3.5056E-2 |
| 1 |      | 582.0      | 2.8741E-2 |
| 1 |      | 486.0      | 2.5810E-2 |
| 1 |      | 796.0      | 1.7267E-2 |
| 1 |      | ***        | ***       |
| 1 |      | ***        | ***       |
| 1 |      | ***        | ***       |
| 1 |      | ***        | ***       |

Report generated by :

Signature: .....

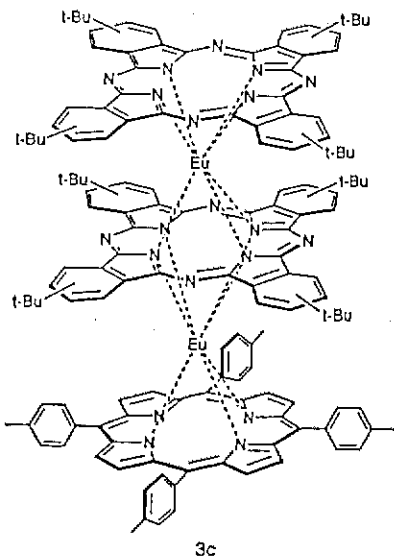

3c



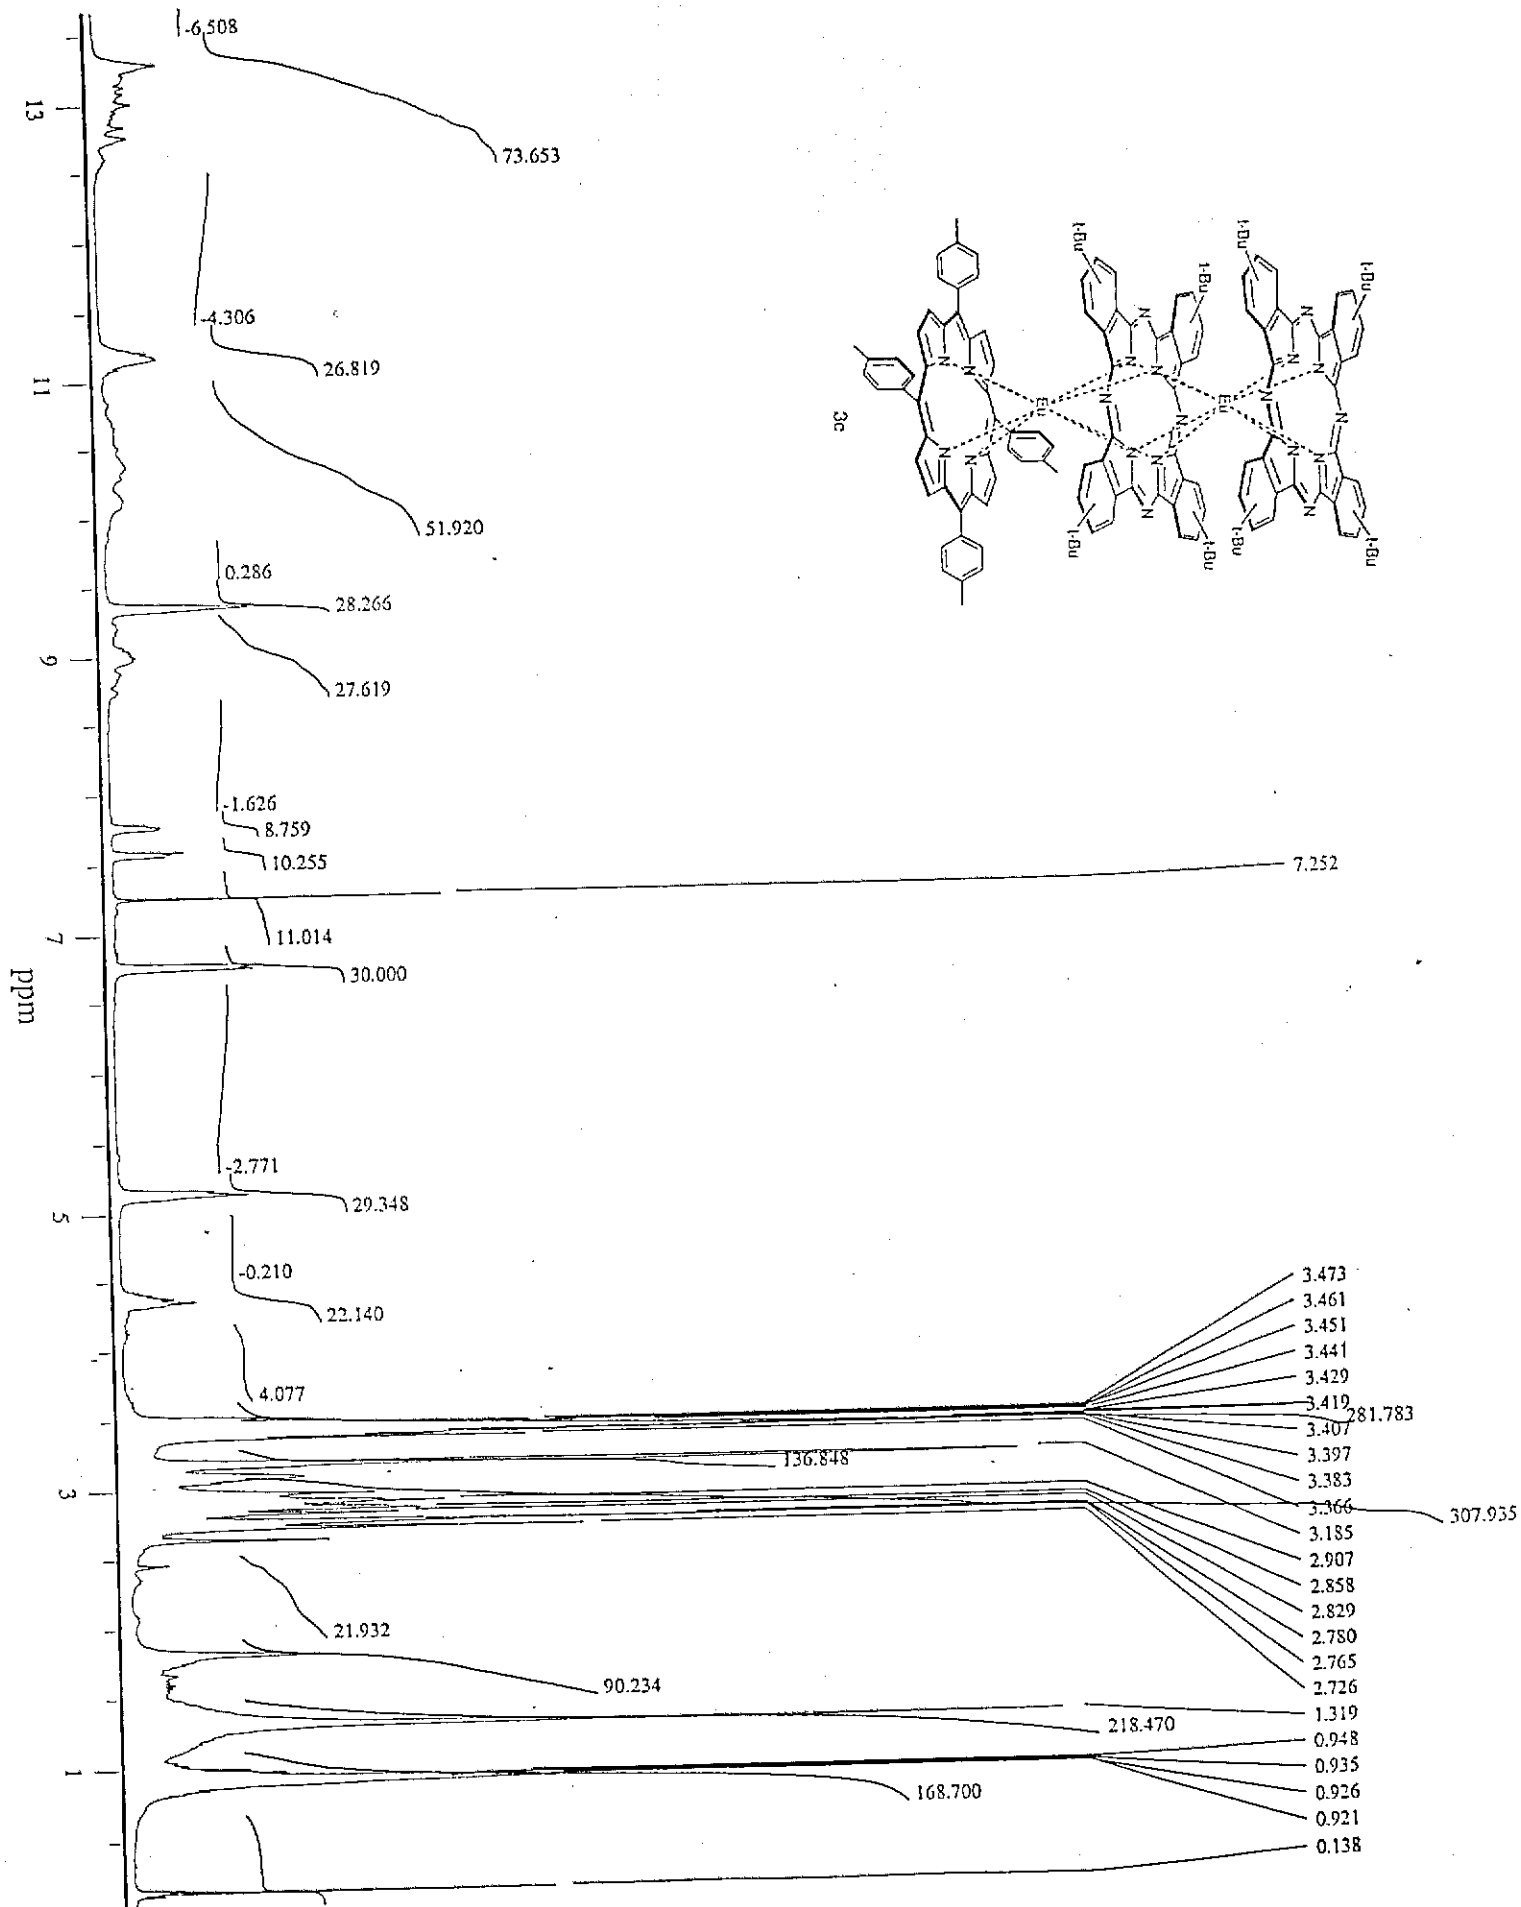









Method file :                      <untitled>  
 Information :                      Default Method  
 Data File :                        C:\HPCHEM\1\DATA\JUNZHONG\SPC2TPEU.SD                      Created  
                                          : 8/16/00 11:27:02

Overlaid Spectra:

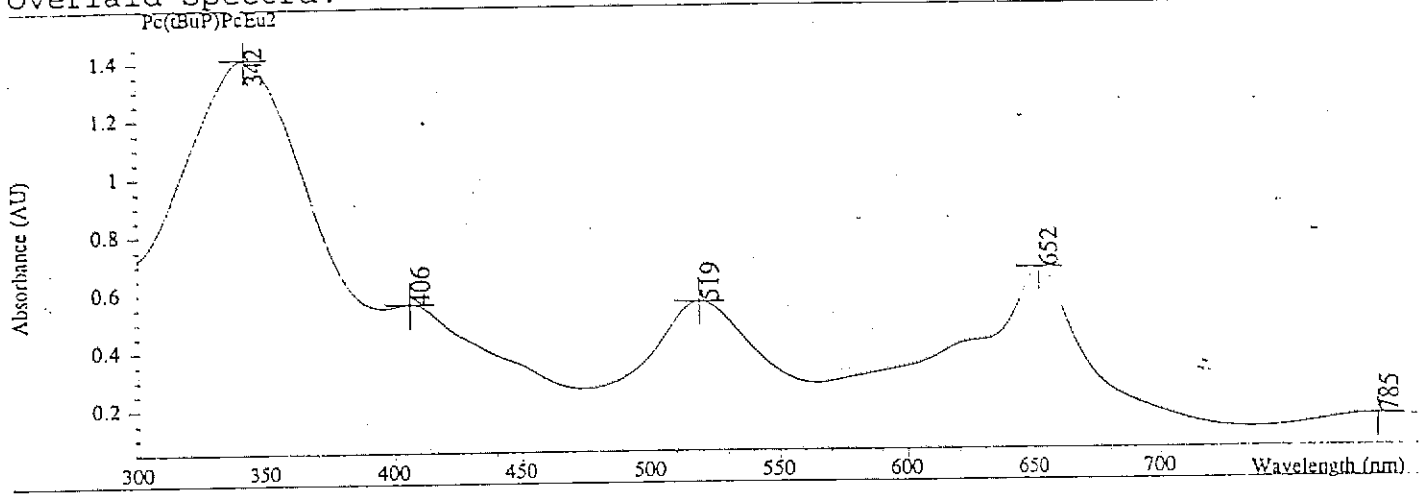

| # | Name            | Peaks (nm) | Abs (AU) |
|---|-----------------|------------|----------|
| 1 | Pc (tBuP) PcEu2 | 342.0      | 1.41230  |
| 1 |                 | 652.0      | 0.67196  |
| 1 |                 | 519.0      | 0.56479  |
| 1 |                 | 406.0      | 0.56286  |
| 1 |                 | 785.0      | 0.15472  |
| 1 |                 | ***        | ***      |

Report generated by

Signature: .....

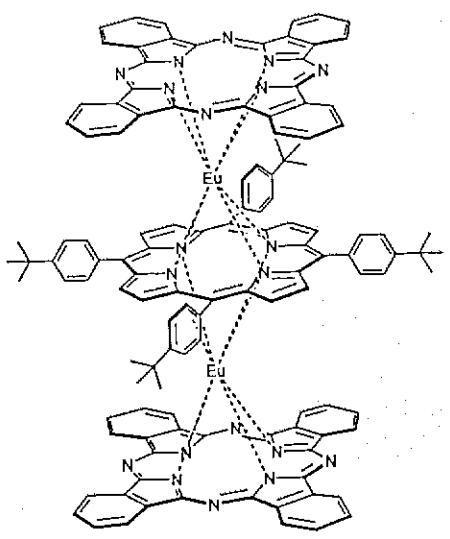

a.i.

1400

1200

1000

800

600

400

200

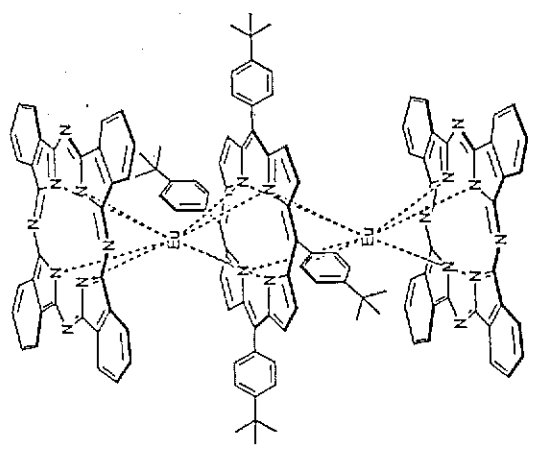

<2157.59

<1494.71

<984.36

m/z

INSTRUM TOP  
 OpId Unknown  
 SPPNAM 001060  
 AC\_DATE Tue Aug 15 11:33:21 2000  
 PATH C:\data\chemistry\LINDSEY\JUNZHONG  
 JOB 001  
 ACQV\_a Reflector  
 TID 40000  
 NSHOTS 100  
 SMOHUN 0  
 SMOPTS1 0  
 SMOPTS2 0  
 SMOPTS3 0  
 DM 1.00 [ns]  
 DELAY 0 [ns]  
 Uis1 20.00 [KV]  
 Uis2 18.50 [KV]  
 Uis3 0.00 [KV]  
 Uis4 7.50 [KV]  
 Uis5 10.00 [KV]  
 RfCell 0.00 [KV]  
 Uatck 1.55 [KV]  
 Uatck 0.00 [KV]  
 Uatck 2.00 [KV]  
 REPHZ 1.00 [Hz]  
 ATTEN 29.0  
 MLI 207732.845  
 MLI 350.872  
 MLI 0.000  
 HITURBO no  
 CDEON yes  
 GUEPLY short  
 DEFION no  
 KLASND no  
 ULS3800 no  
 ULS3800 no  
 DFCALI 510.84  
 DPHASS 200.00 [Ds]  
 RENOVAL 0.33  
 LEADVAL 0.28  
 IZSRND 0.91  
 SWI Post-Supp 100  
 CMT2 ACC=24, 100 shots
