# Supplementary material for: Studies related to the design and synthesis of a molecular octal counter
Source: Royal Society of Chemistry journal article supplement (doi:10.1039/b008224o), 2001-01-01
Supplement: b008224o4.pdf [file b008224o4.pdf]

Overlaid Spectra:

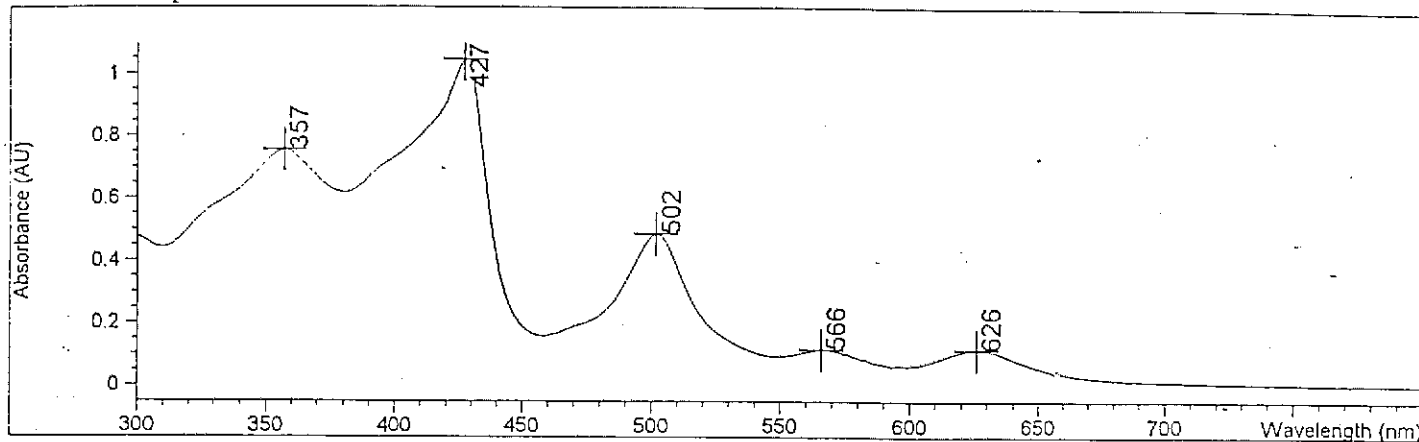

| # | Name | Peaks (nm) | Abs (AU) |
|---|------|------------|----------|
| 1 |      | 427.0      | 1.04440  |
| 1 |      | 357.0      | 0.75438  |
| 1 |      | 502.0      | 0.48679  |
| 1 |      | 626.0      | 0.11600  |
| 1 |      | 566.0      | 0.11515  |

Report generated by :

Signature: .....

\*\*\* End Spectrum/Peak Report \*\*\*

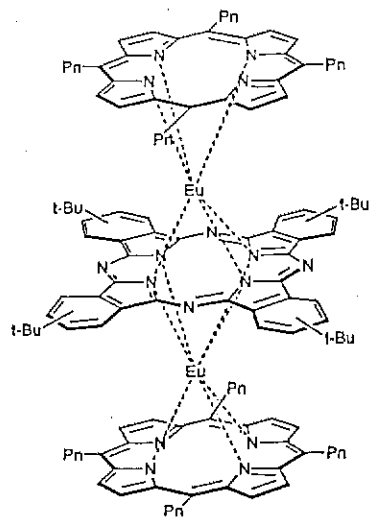

Pn = pentyl

6a

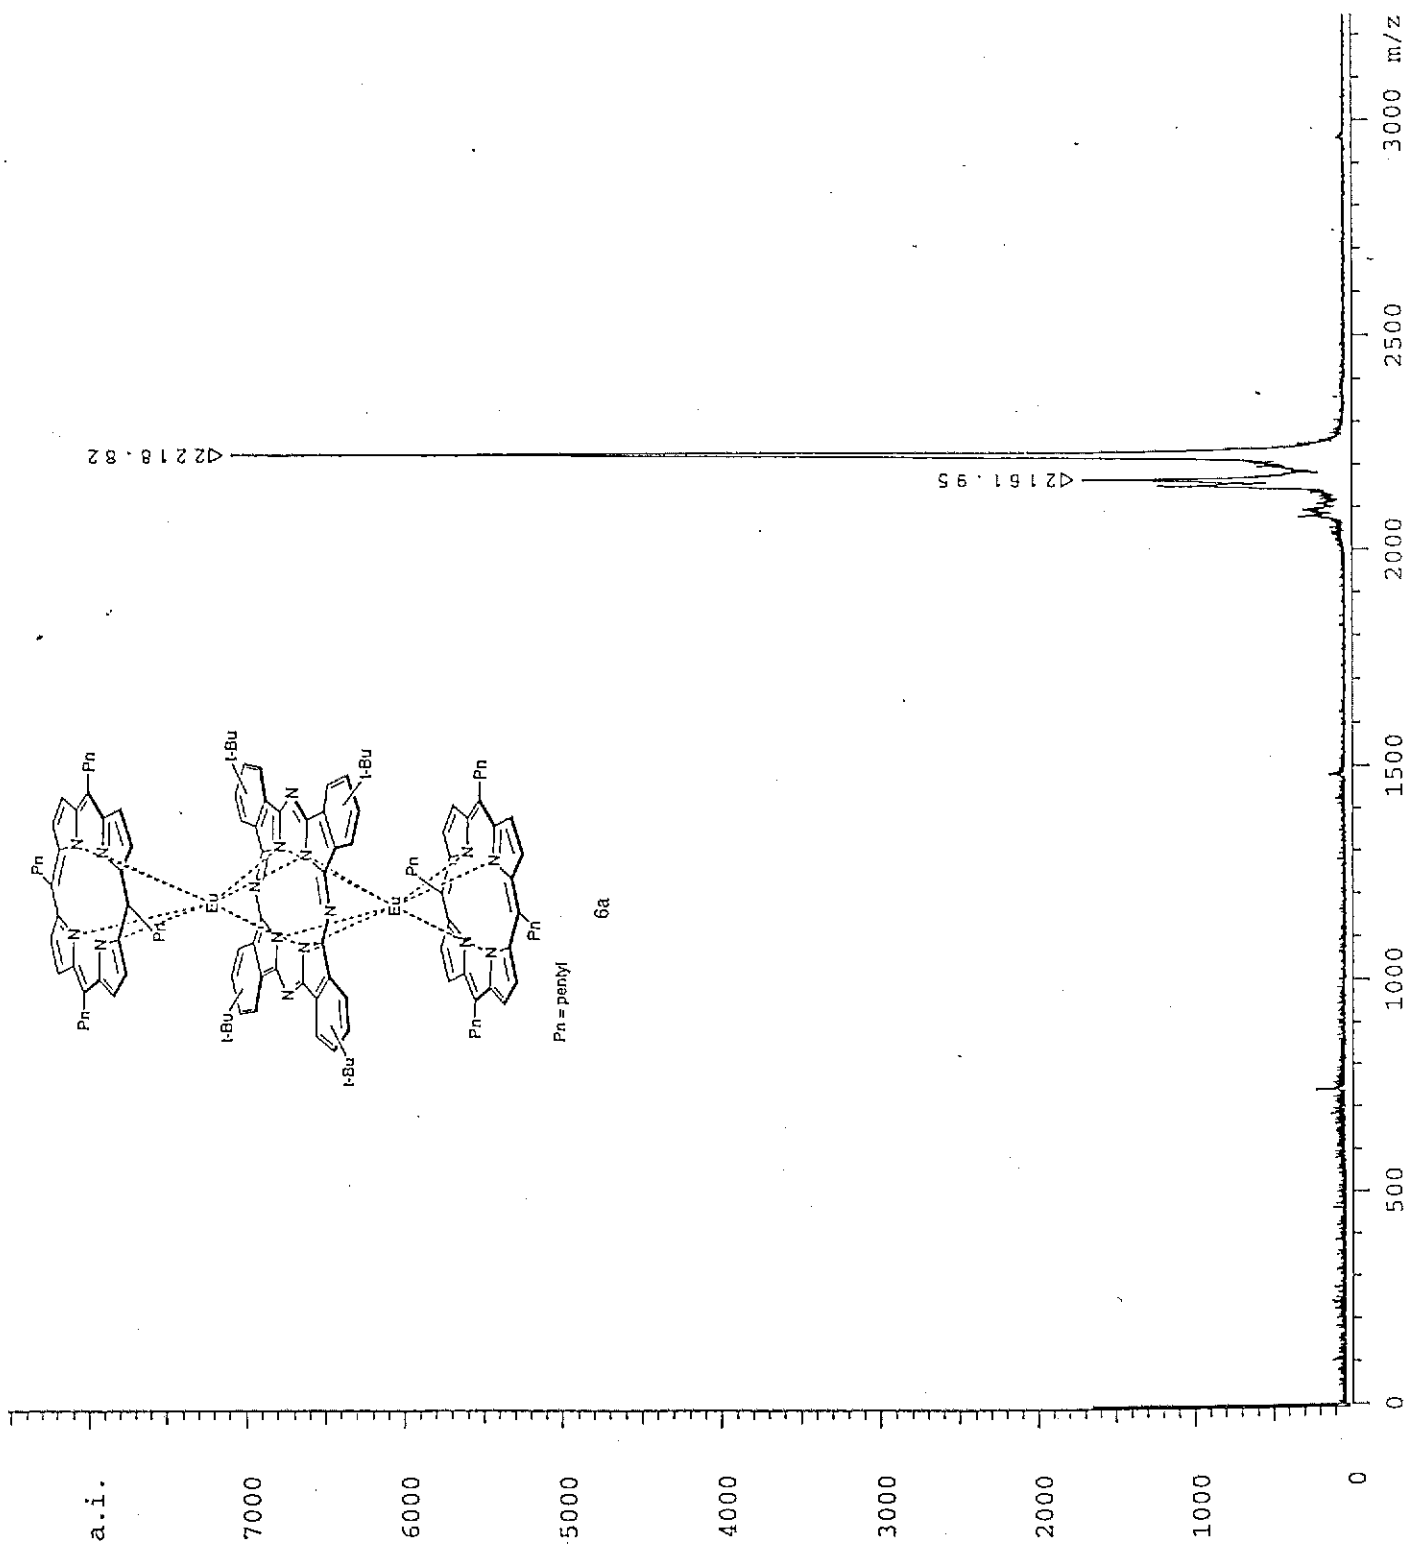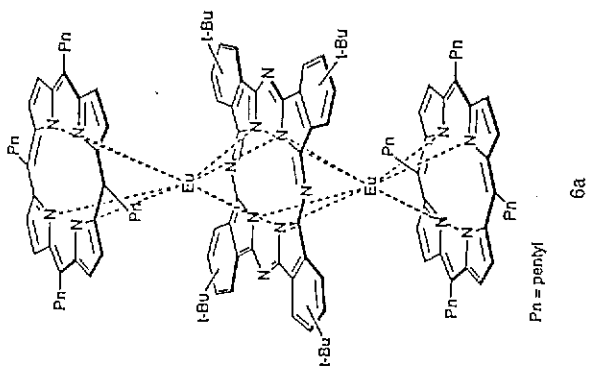

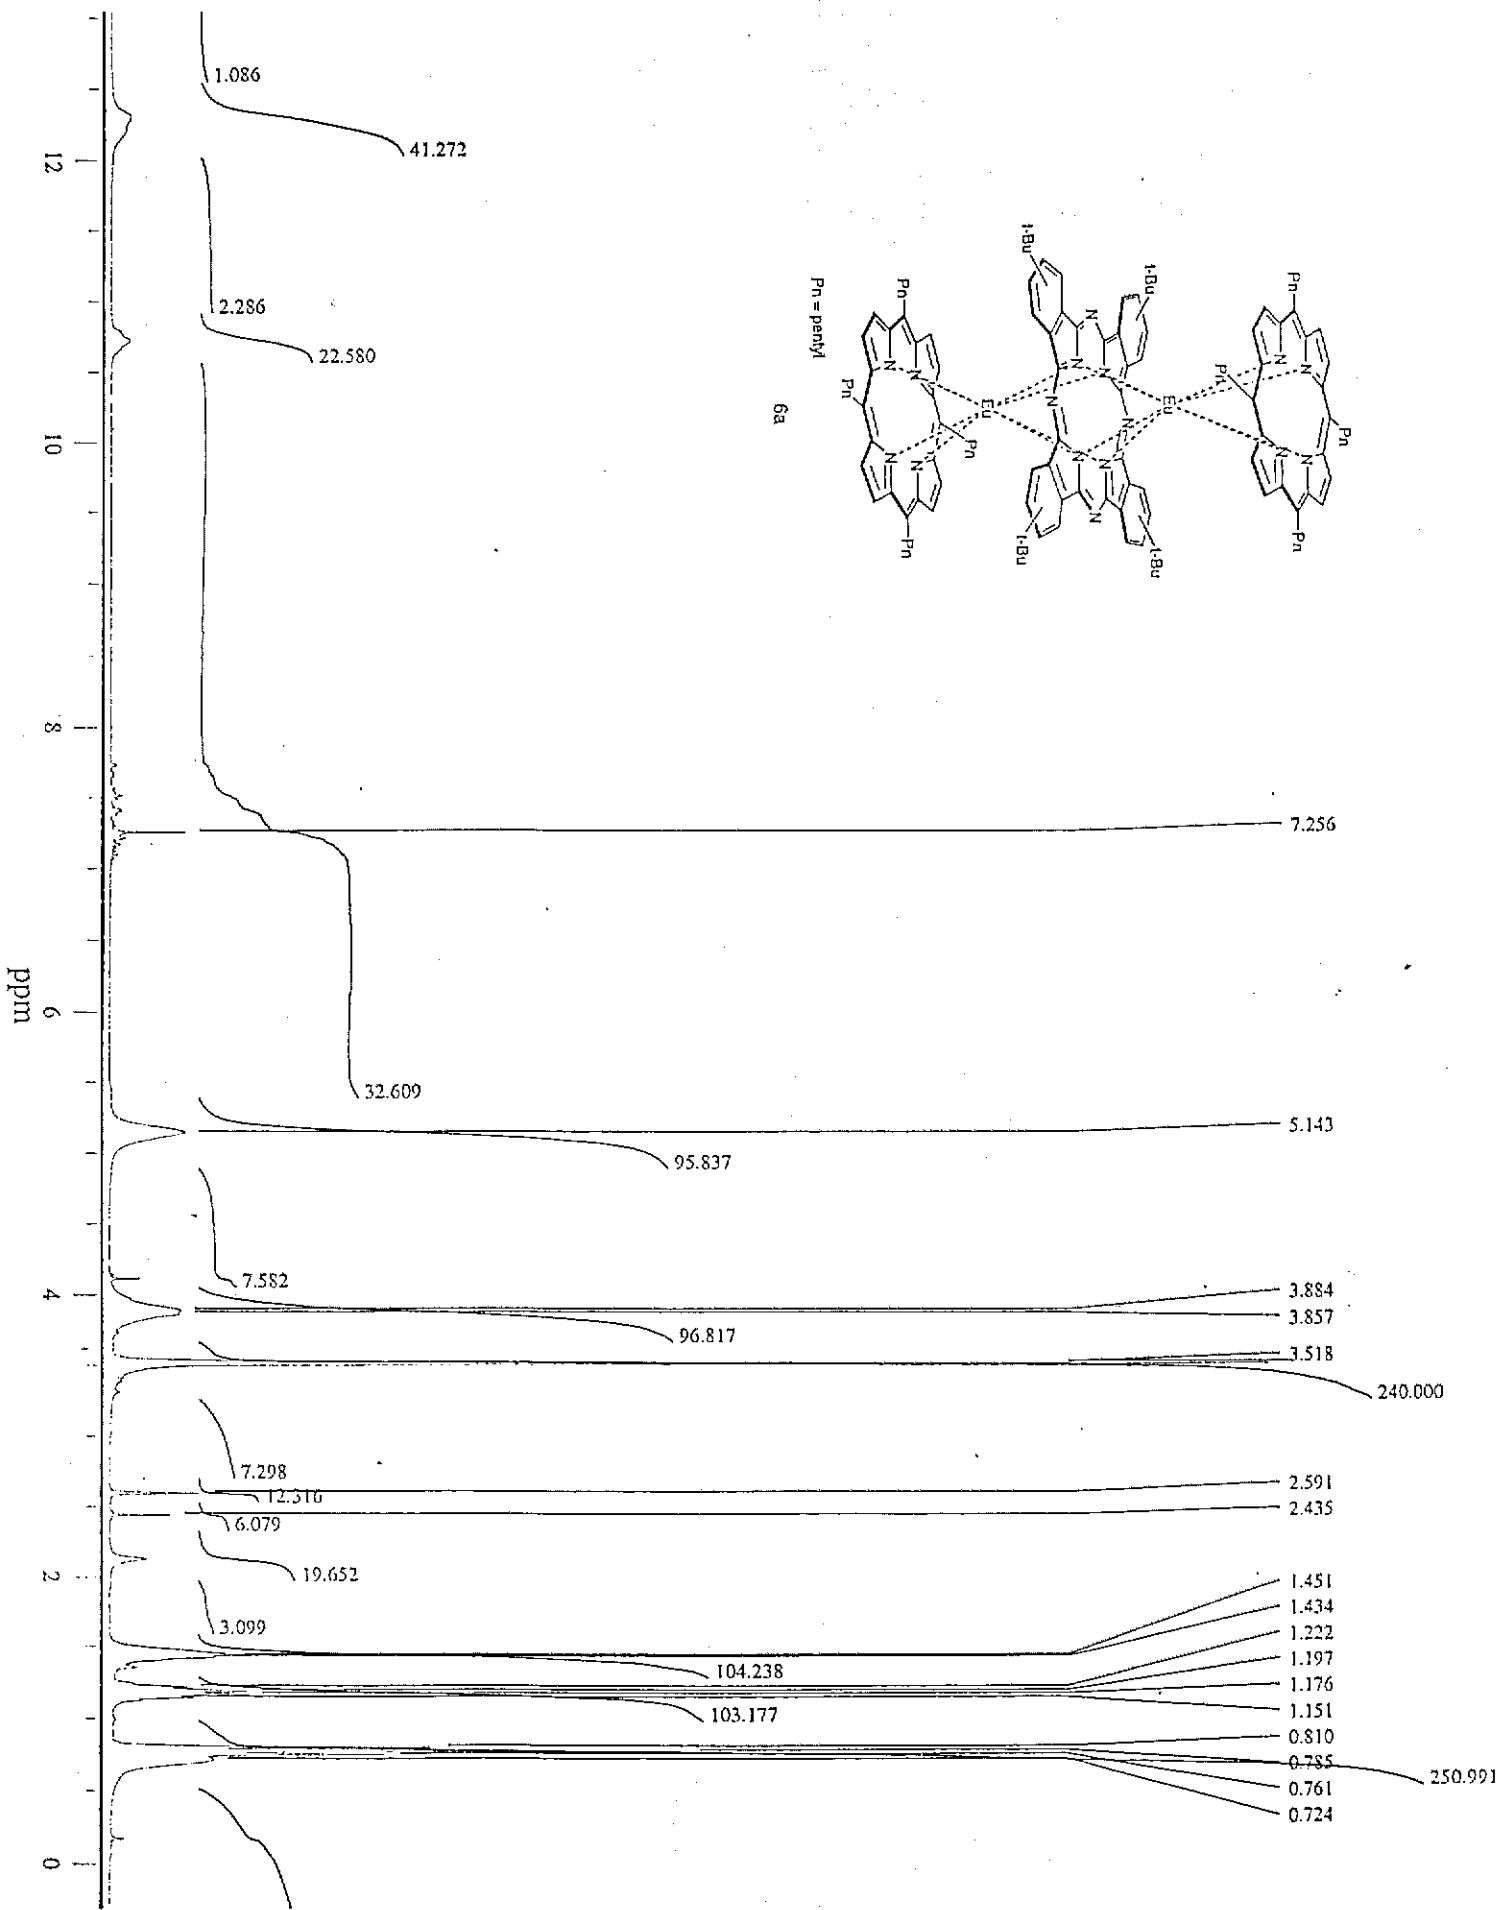

Overlaid Spectra:

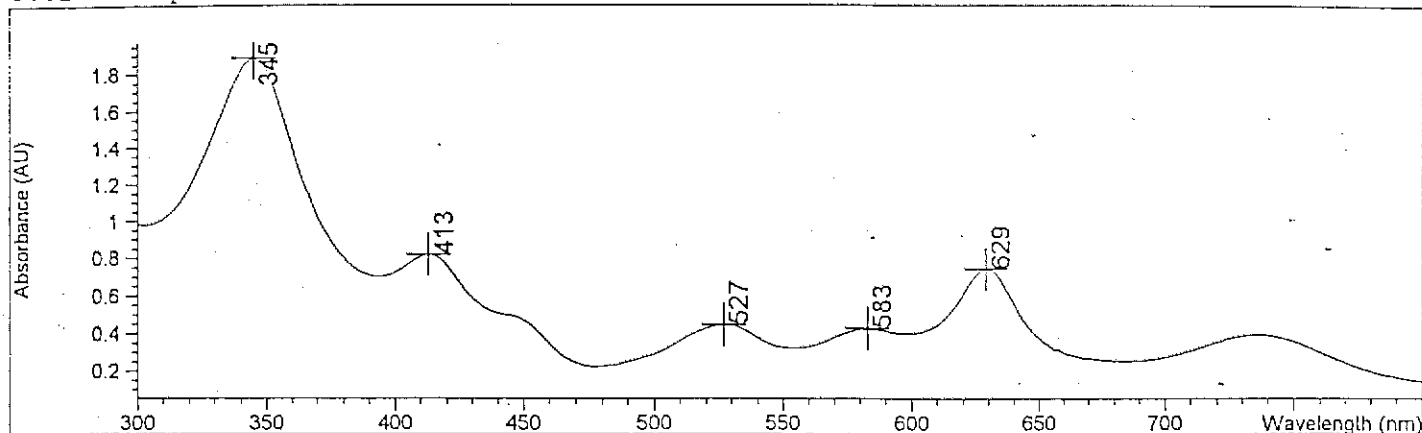

| # | Name | Peaks (nm) | Abs (AU) |
|---|------|------------|----------|
| 1 |      | 345.0      | 1.89050  |
| 1 |      | 413.0      | 0.82285  |
| 1 |      | 629.0      | 0.74813  |
| 1 |      | 527.0      | 0.44887  |
| 1 |      | 583.0      | 0.42958  |

Report generated by :

Signature: .....

\*\*\* End Spectrum/Peak Report \*\*\*

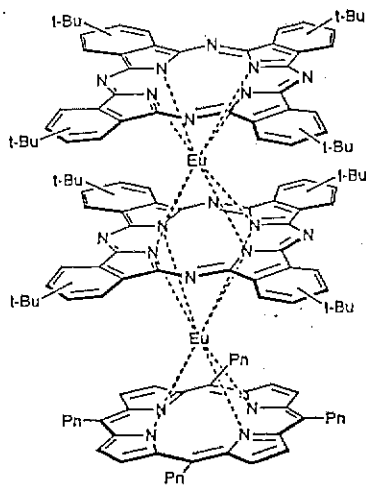

Pn = pentyl

6c

a.i.

6000  
5000  
4000  
3000  
2000  
1000

1500 2000 2500 3000 m/z

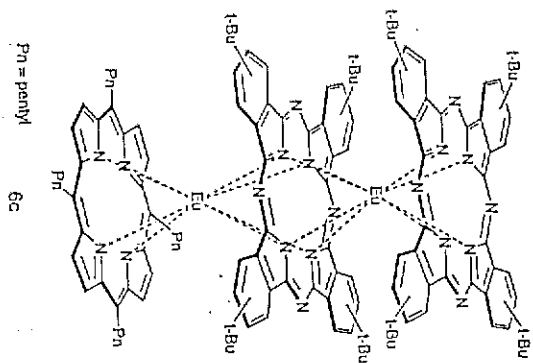

42373.99

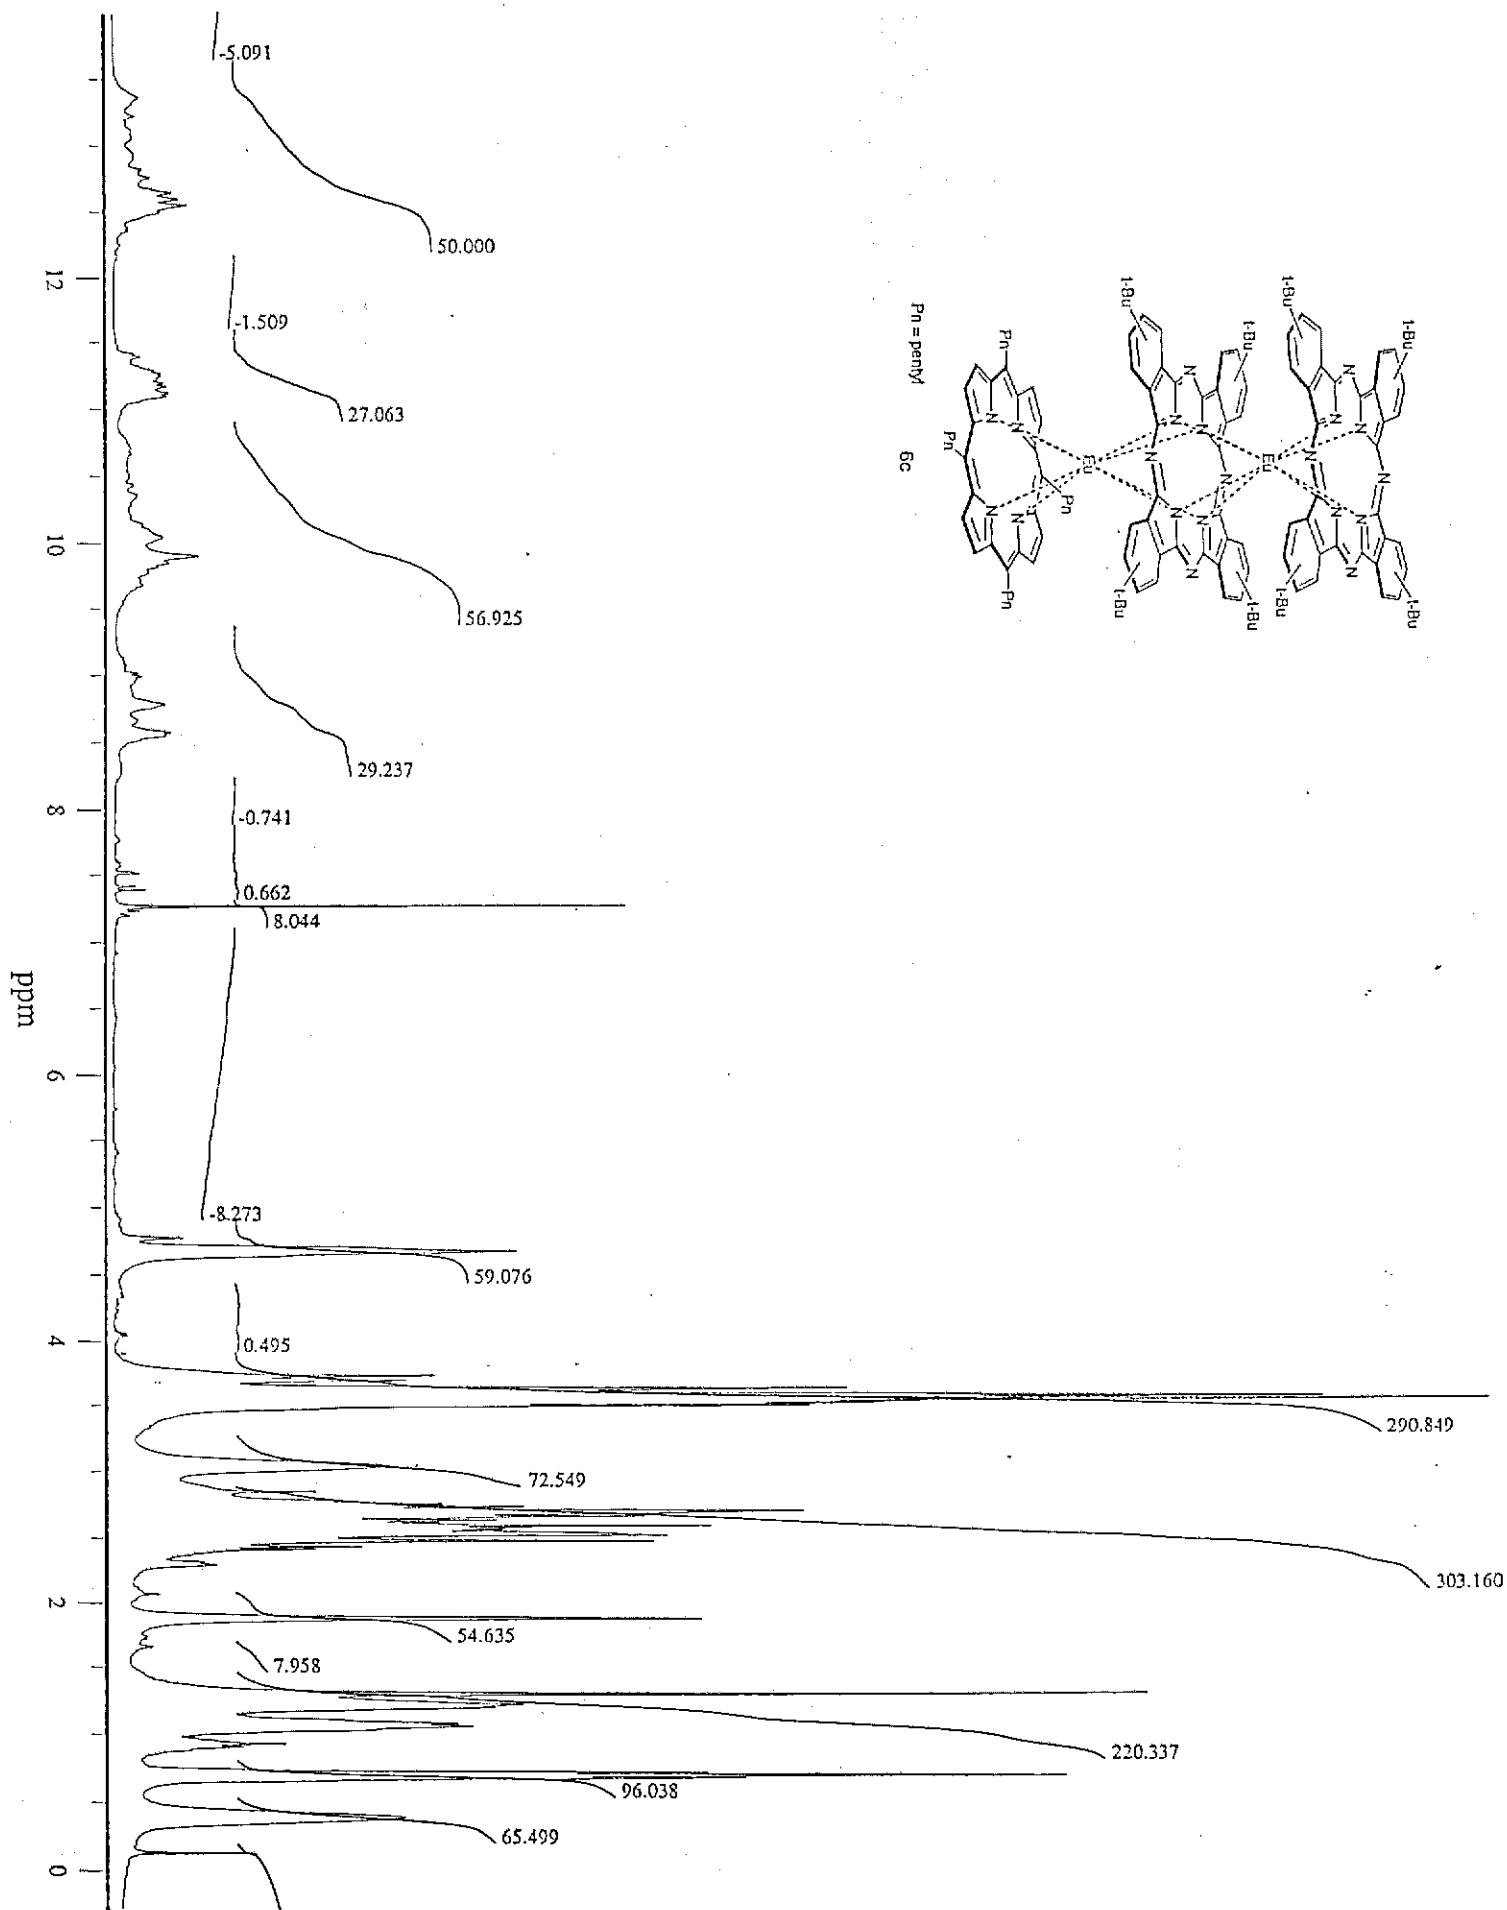

Overlaid Spectra:

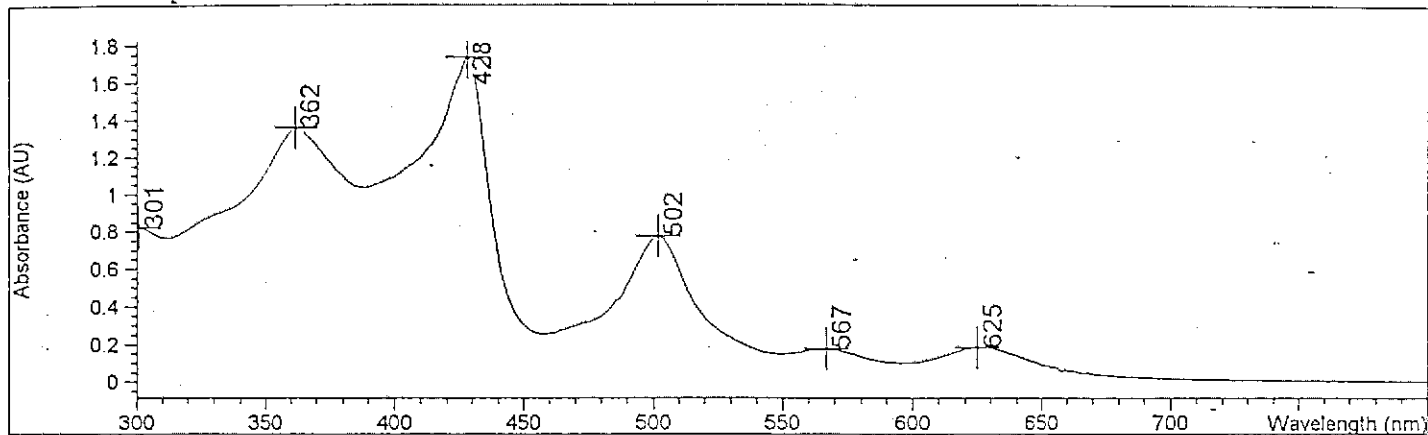

| # | Name | Peaks (nm) | Abs (AU) |
|---|------|------------|----------|
| 1 |      | 428.0      | 1.73790  |
| 1 |      | 362.0      | 1.36060  |
| 1 |      | 301.0      | 0.82247  |
| 1 |      | 502.0      | 0.77687  |
| 1 |      | 625.0      | 0.18555  |
| 1 |      | 567.0      | 0.17725  |

Report generated by :

Signature: .....

\*\*\* End Spectrum/Peak Report \*\*\*

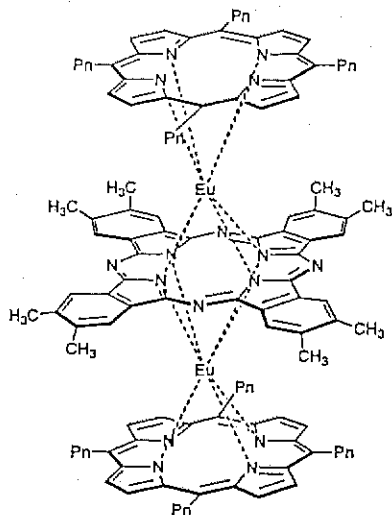

Pn = pentyll

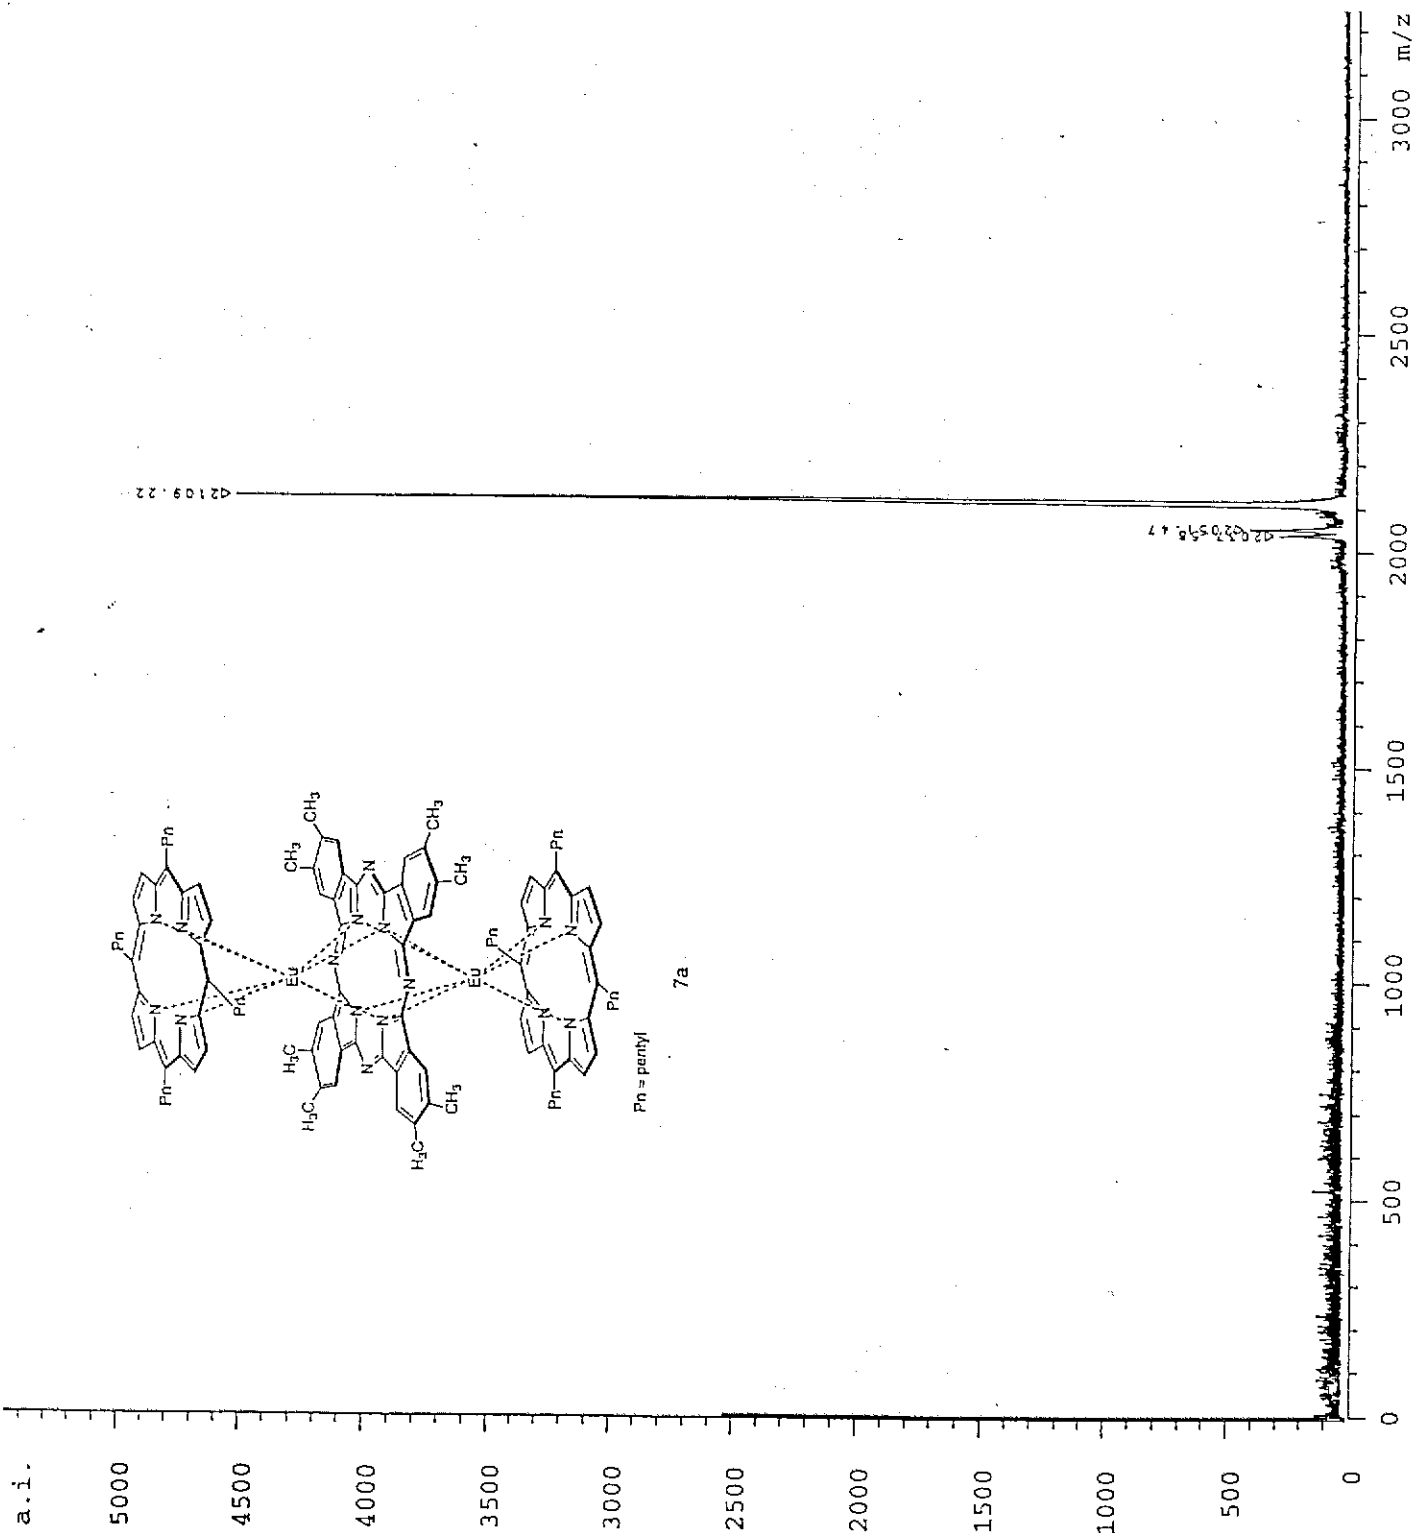



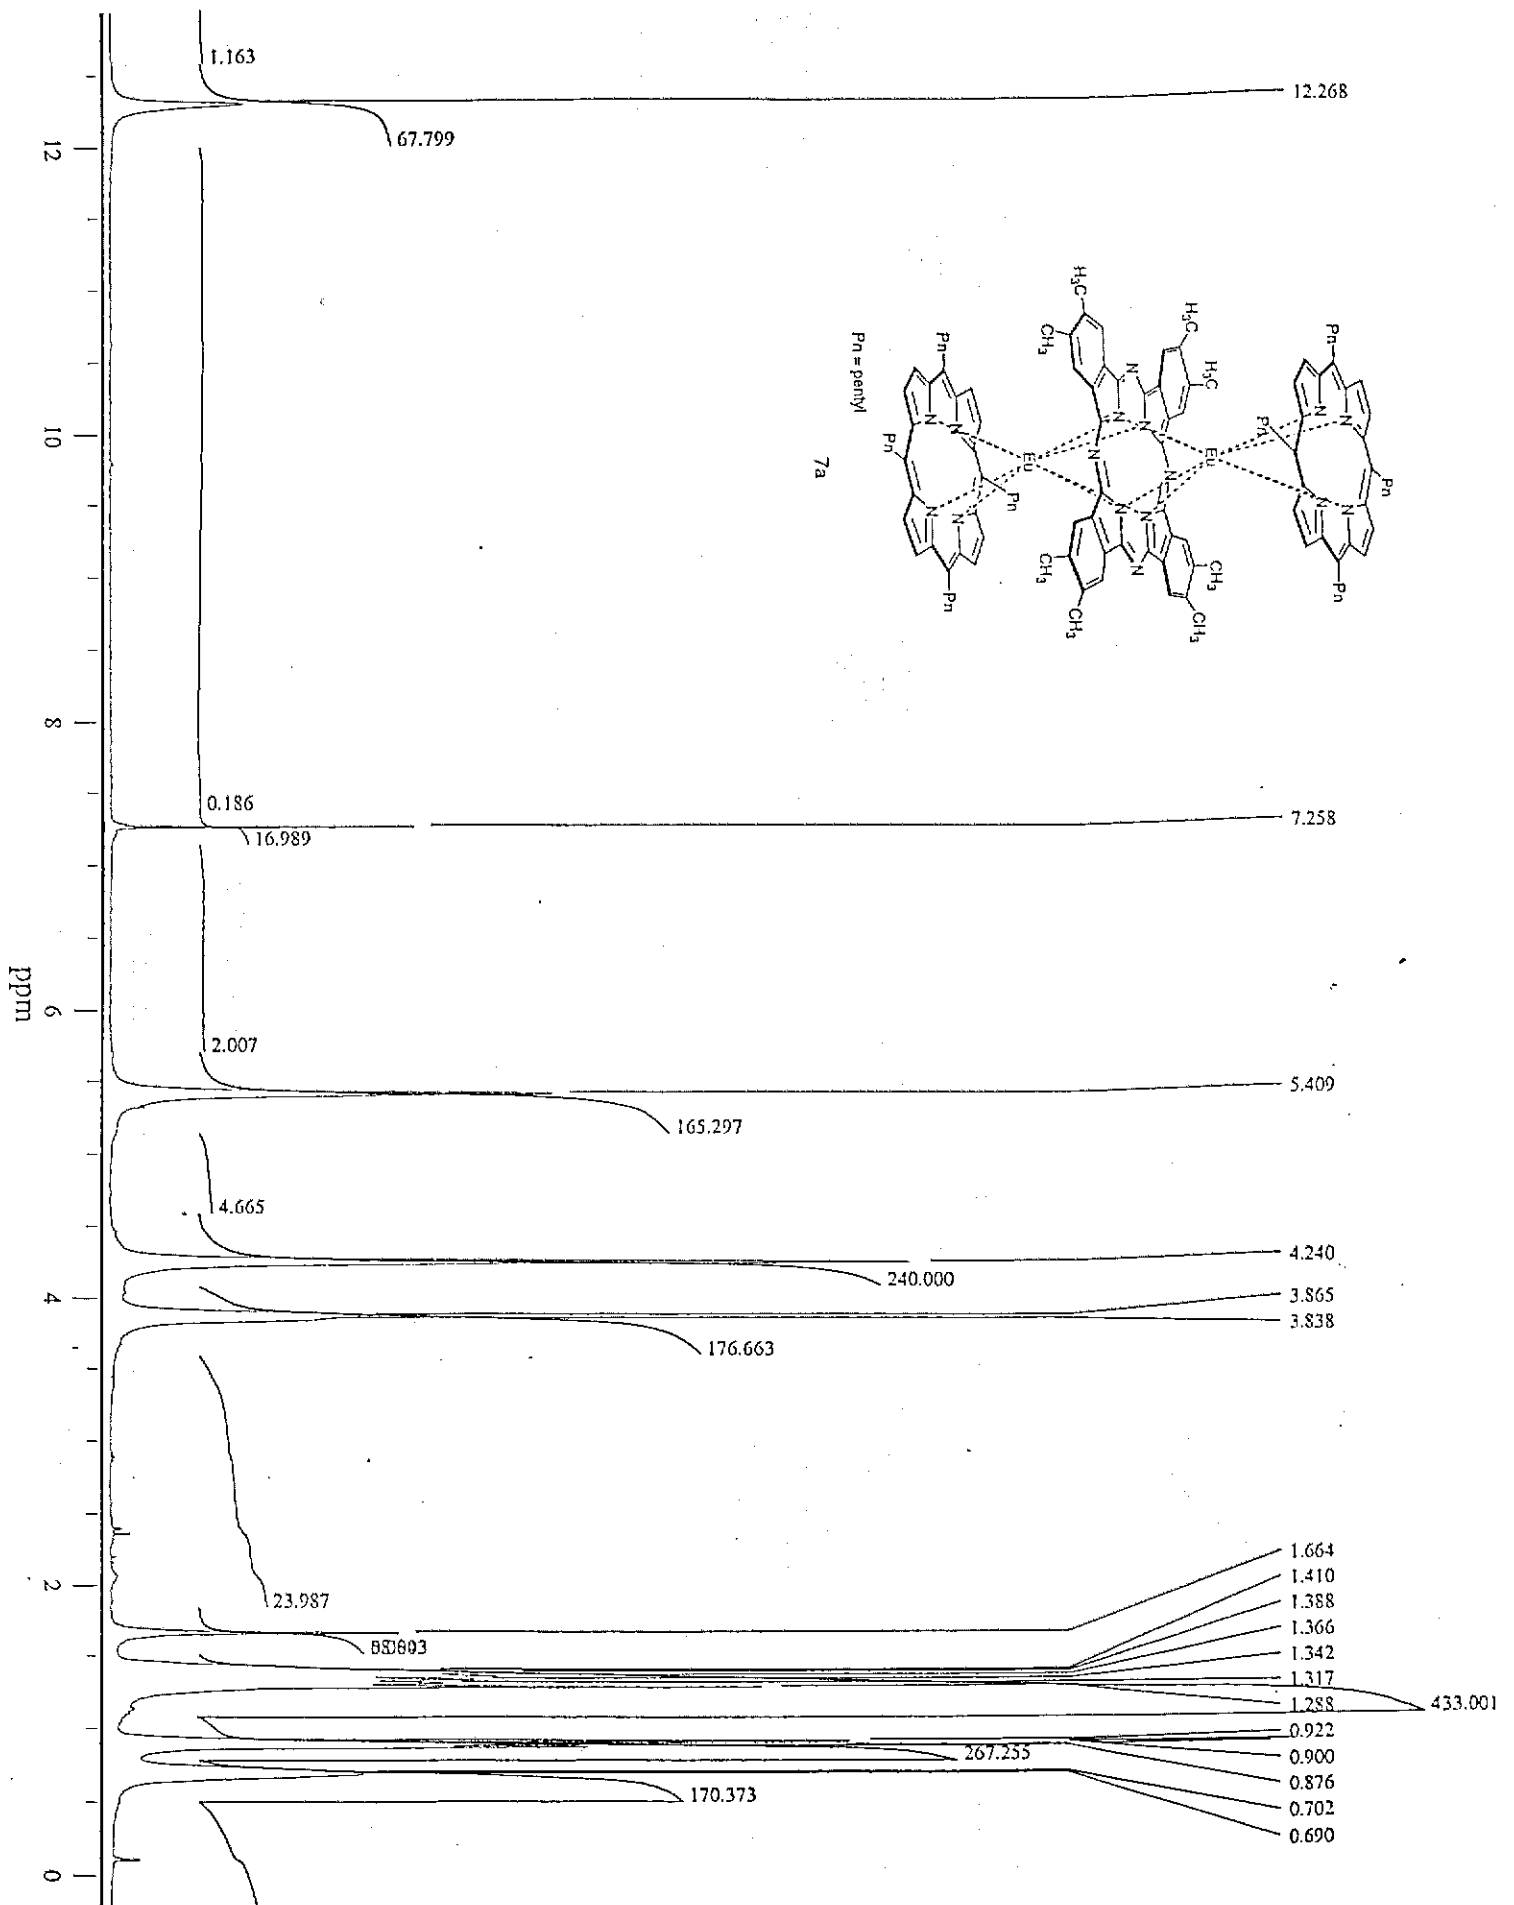

Overlaid Spectra:

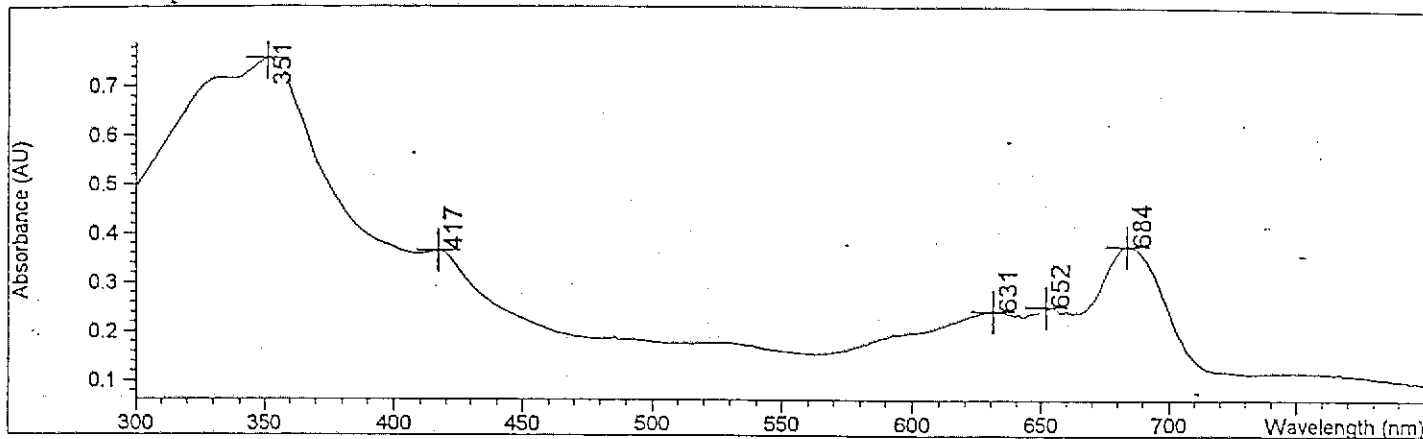

| # | Name | Peaks (nm) | Abs (AU) |
|---|------|------------|----------|
| 1 |      | 351.0      | 0.75644  |
| 1 |      | 684.0      | 0.37591  |
| 1 |      | 417.0      | 0.36535  |
| 1 |      | 652.0      | 0.25342  |
| 1 |      | 631.0      | 0.24327  |

Report generated by :

Signature: .....

\*\*\* End Spectrum/Peak Report \*\*\*

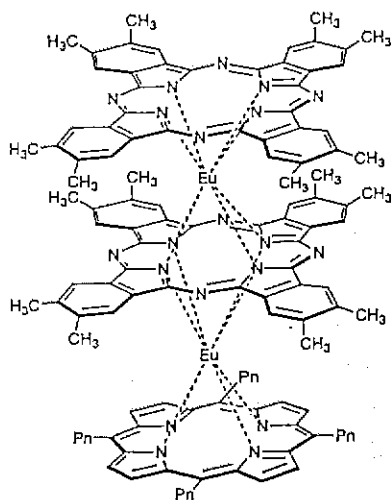

Pn = pentyl
