# Supplementary material for: Studies related to the design and synthesis of a molecular octal counter
Source: Royal Society of Chemistry journal article supplement (doi:10.1039/b008224o), 2001-01-01
Supplement: b008224o6.pdf [file b008224o6.pdf]

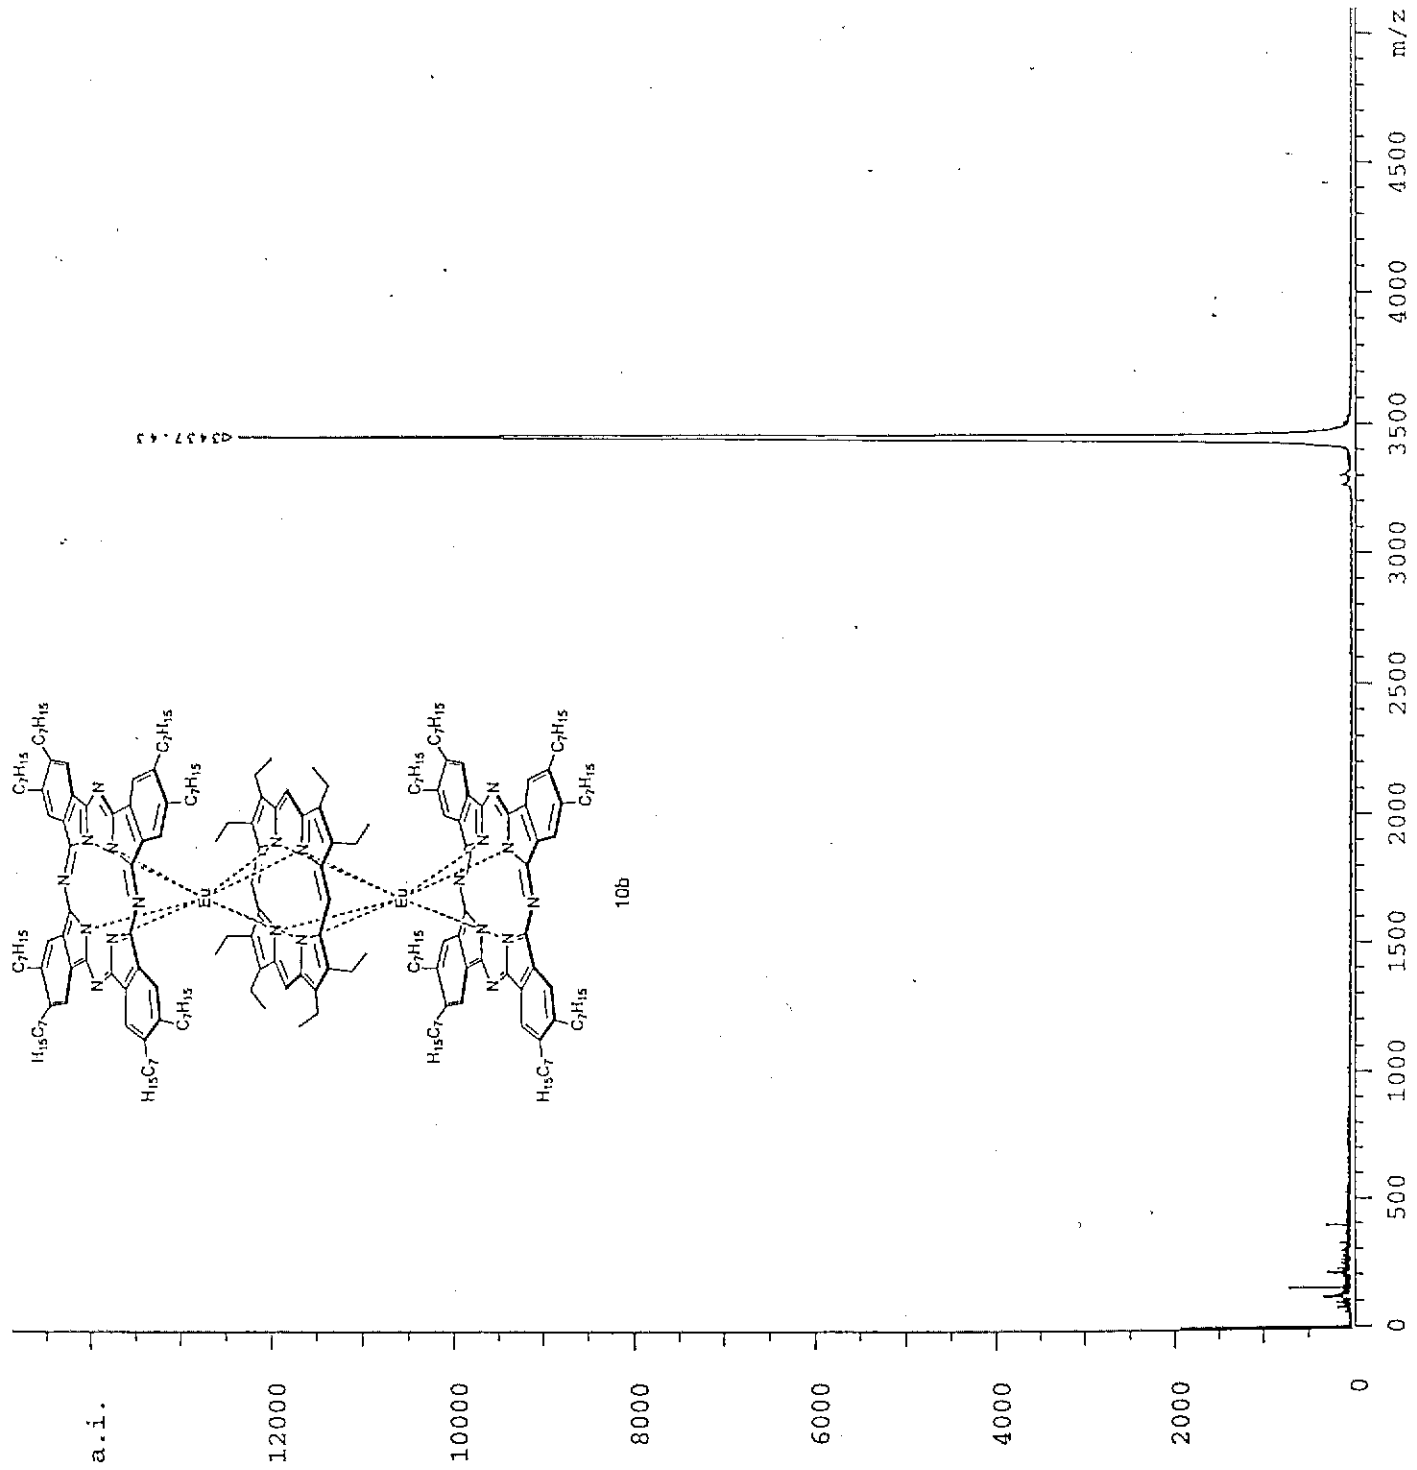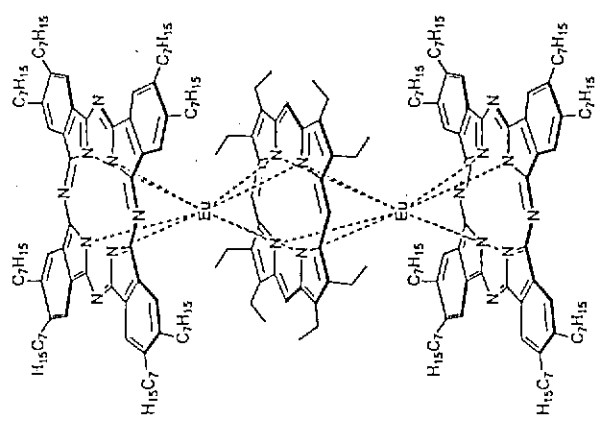

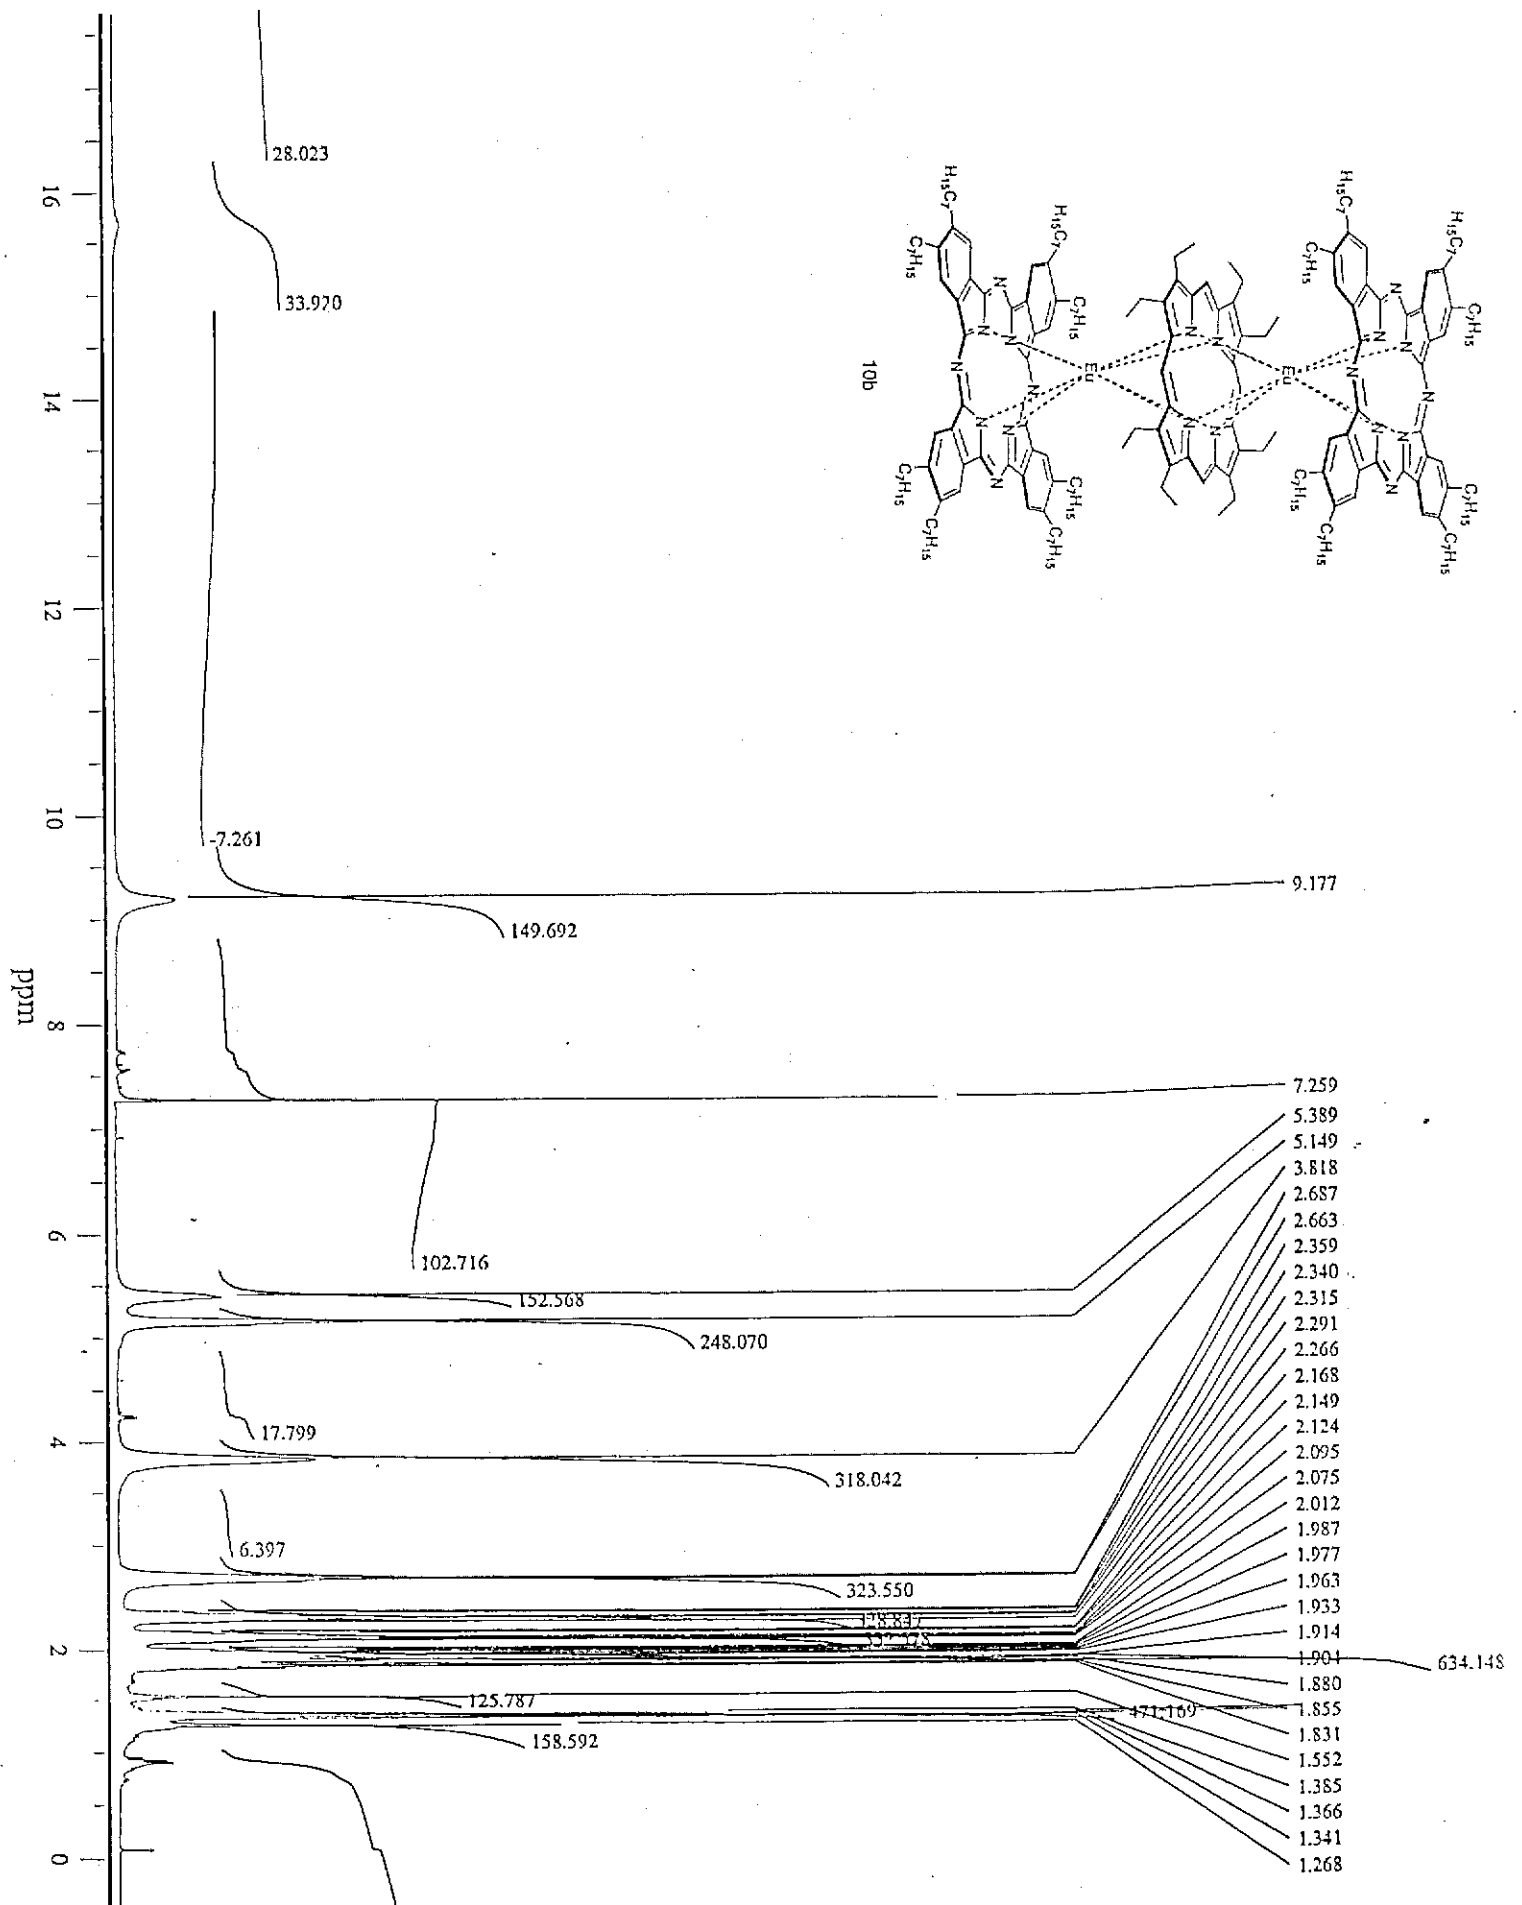

Overlaid Spectra:

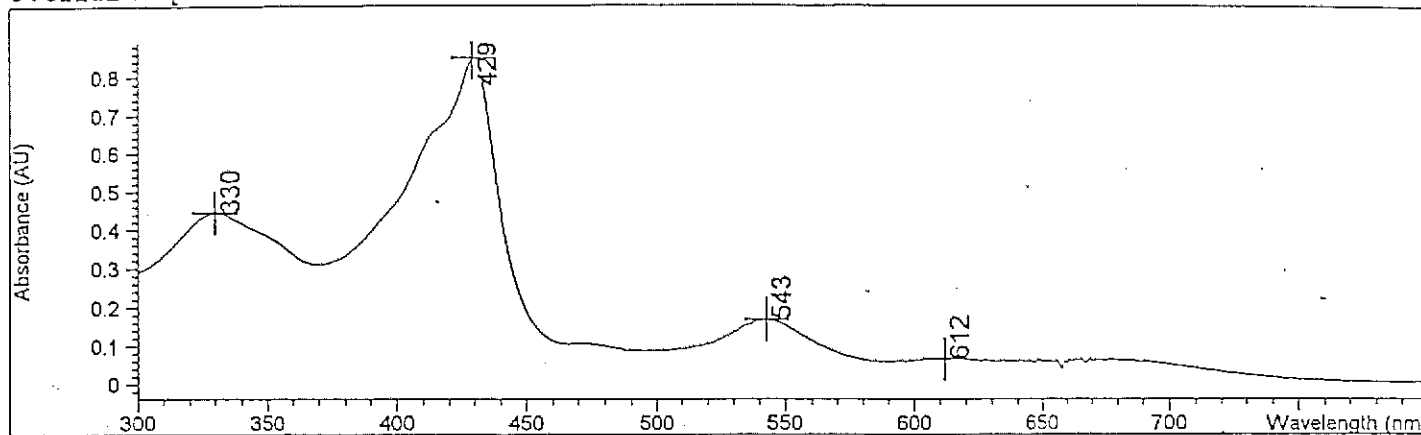

| # | Name | Peaks (nm) | Abs (AU)  |
|---|------|------------|-----------|
| 1 |      | 429.0      | 0.85064   |
| 1 |      | 330.0      | 0.44538   |
| 1 |      | 543.0      | 0.16993   |
| 1 |      | 612.0      | 6.6625E-2 |
| 1 |      | ***        | ***       |
| 1 |      | ***        | ***       |

Report generated by :

Signature: .....

\*\*\* End Spectrum/Peak Report \*\*\*

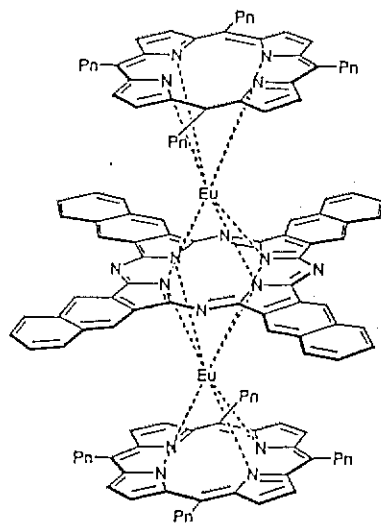

Pn = pentyl

11a

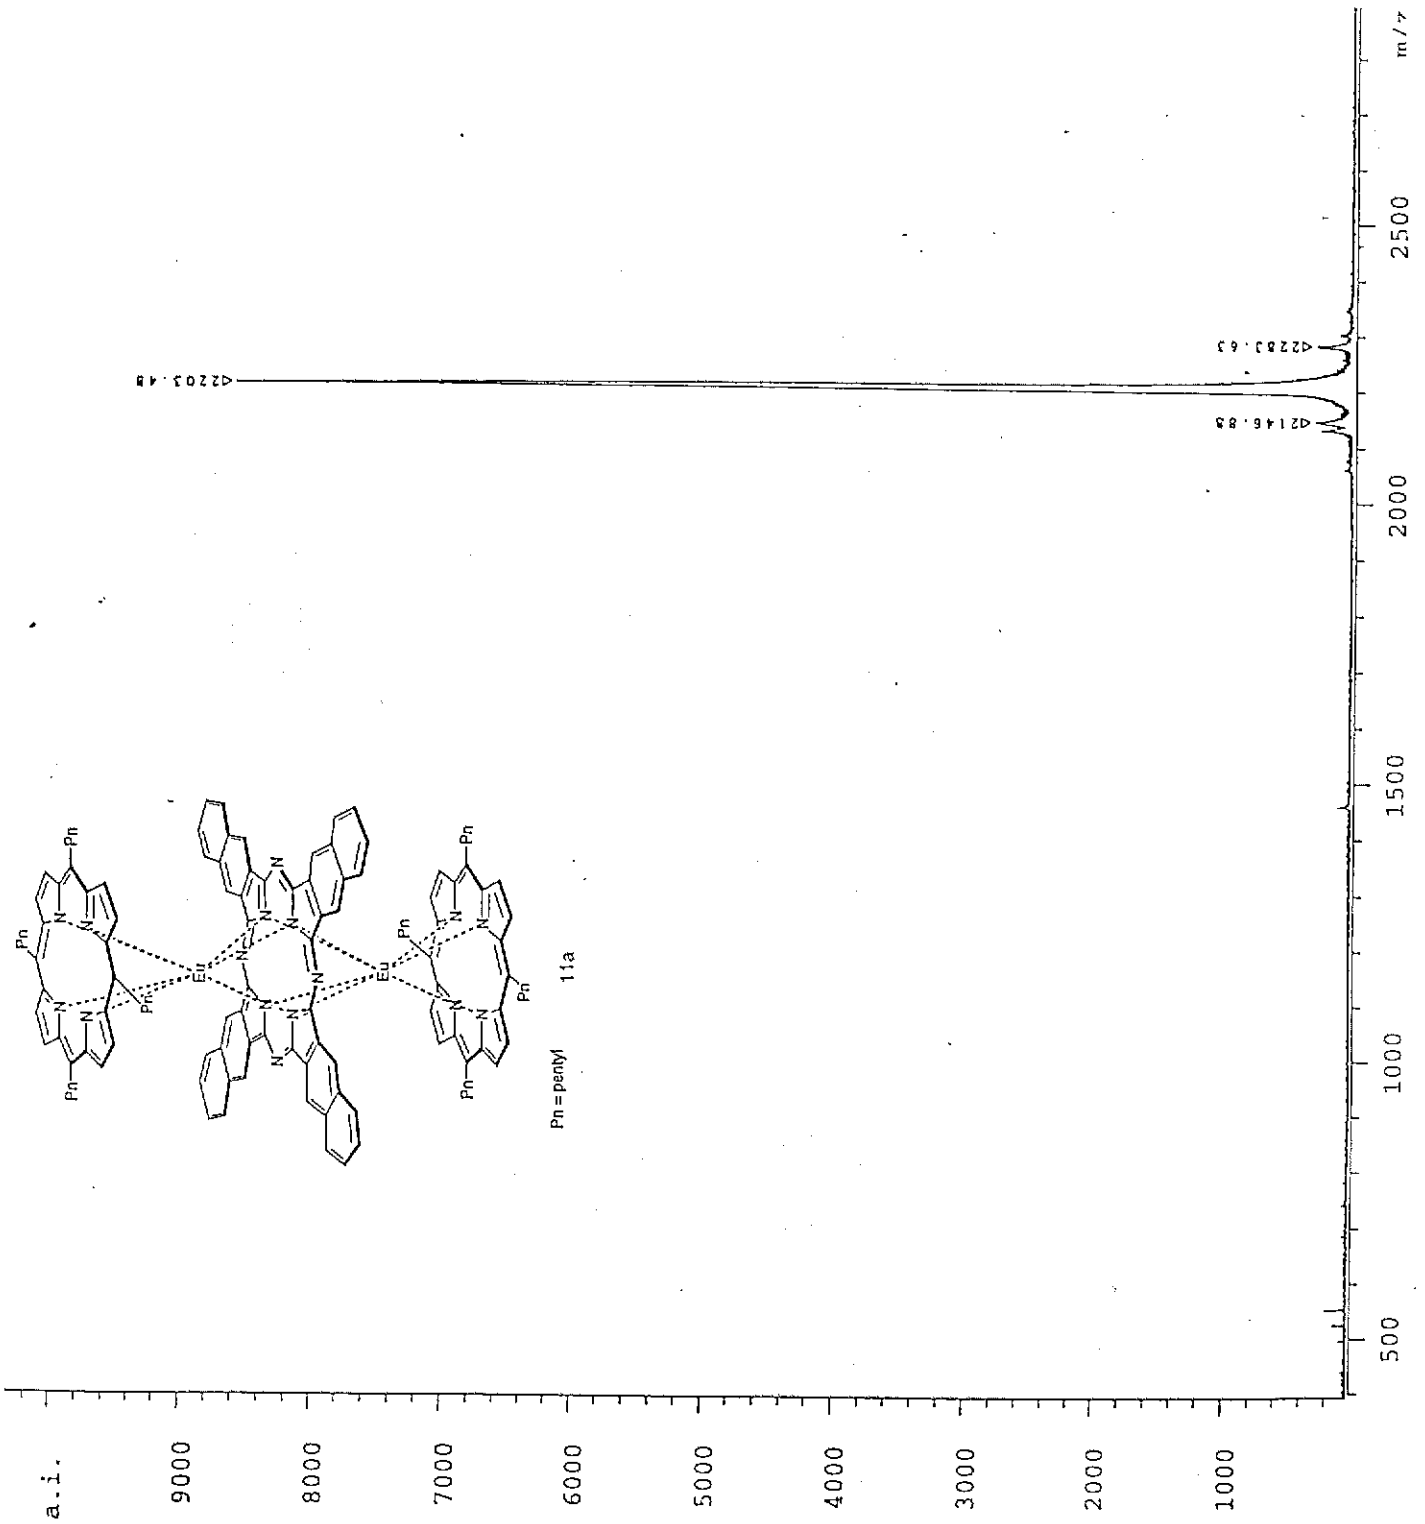

a.i.

9000

8000

7000

6000

5000

4000

3000

2000

1000

500

1000

1500

2000

2500

m/γ

Δ2203.48

Δ2146.25

Δ2282.63

Pn = phenyl

11a

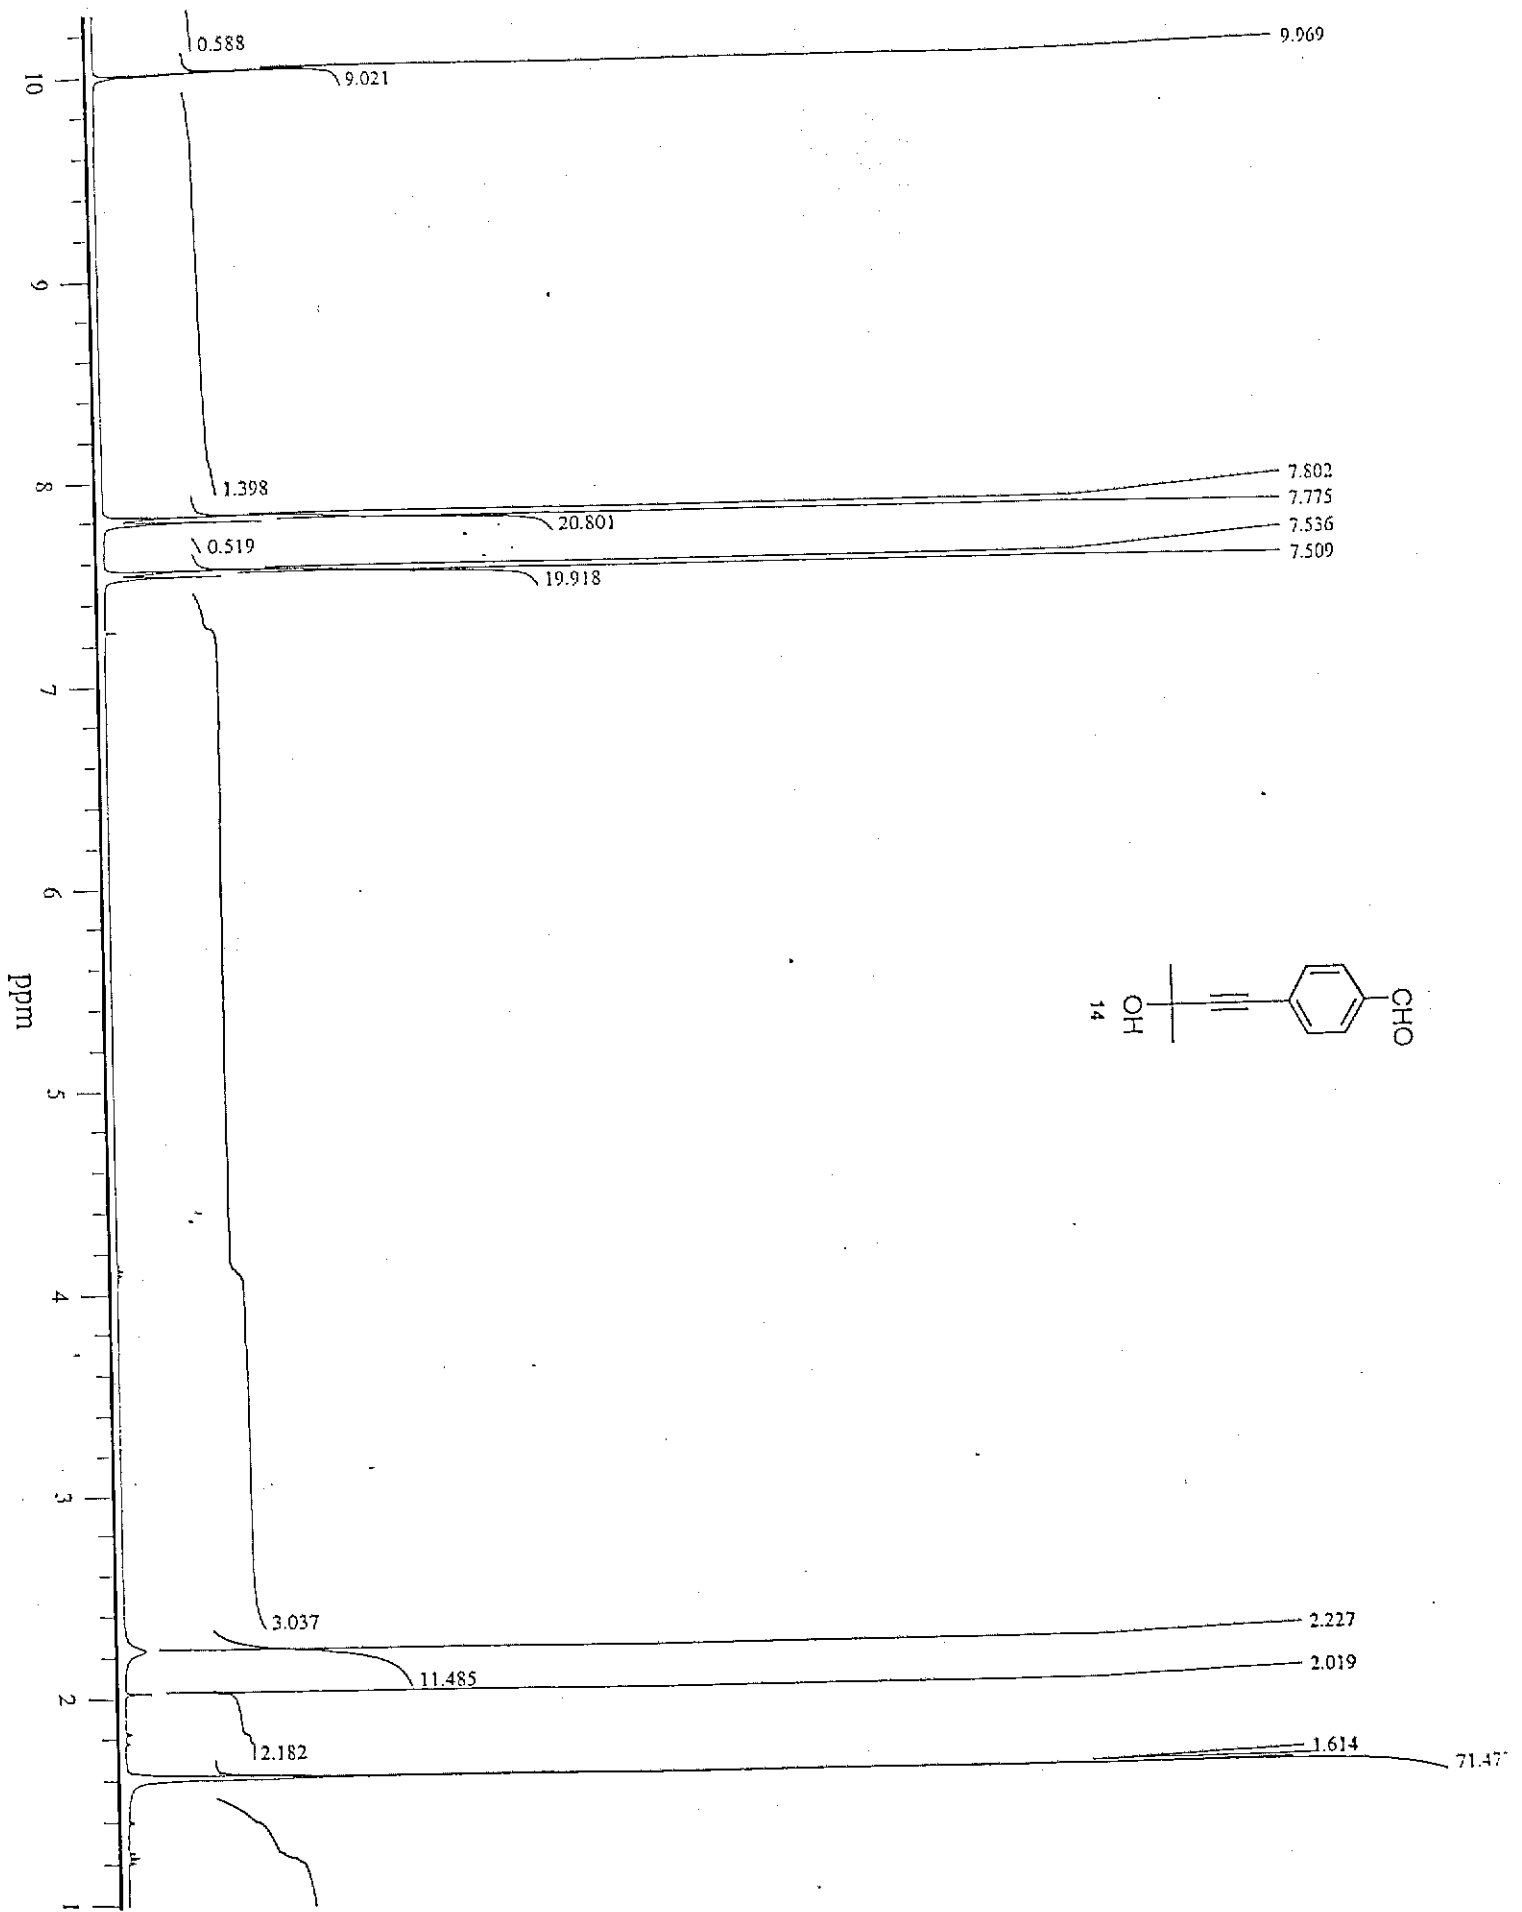

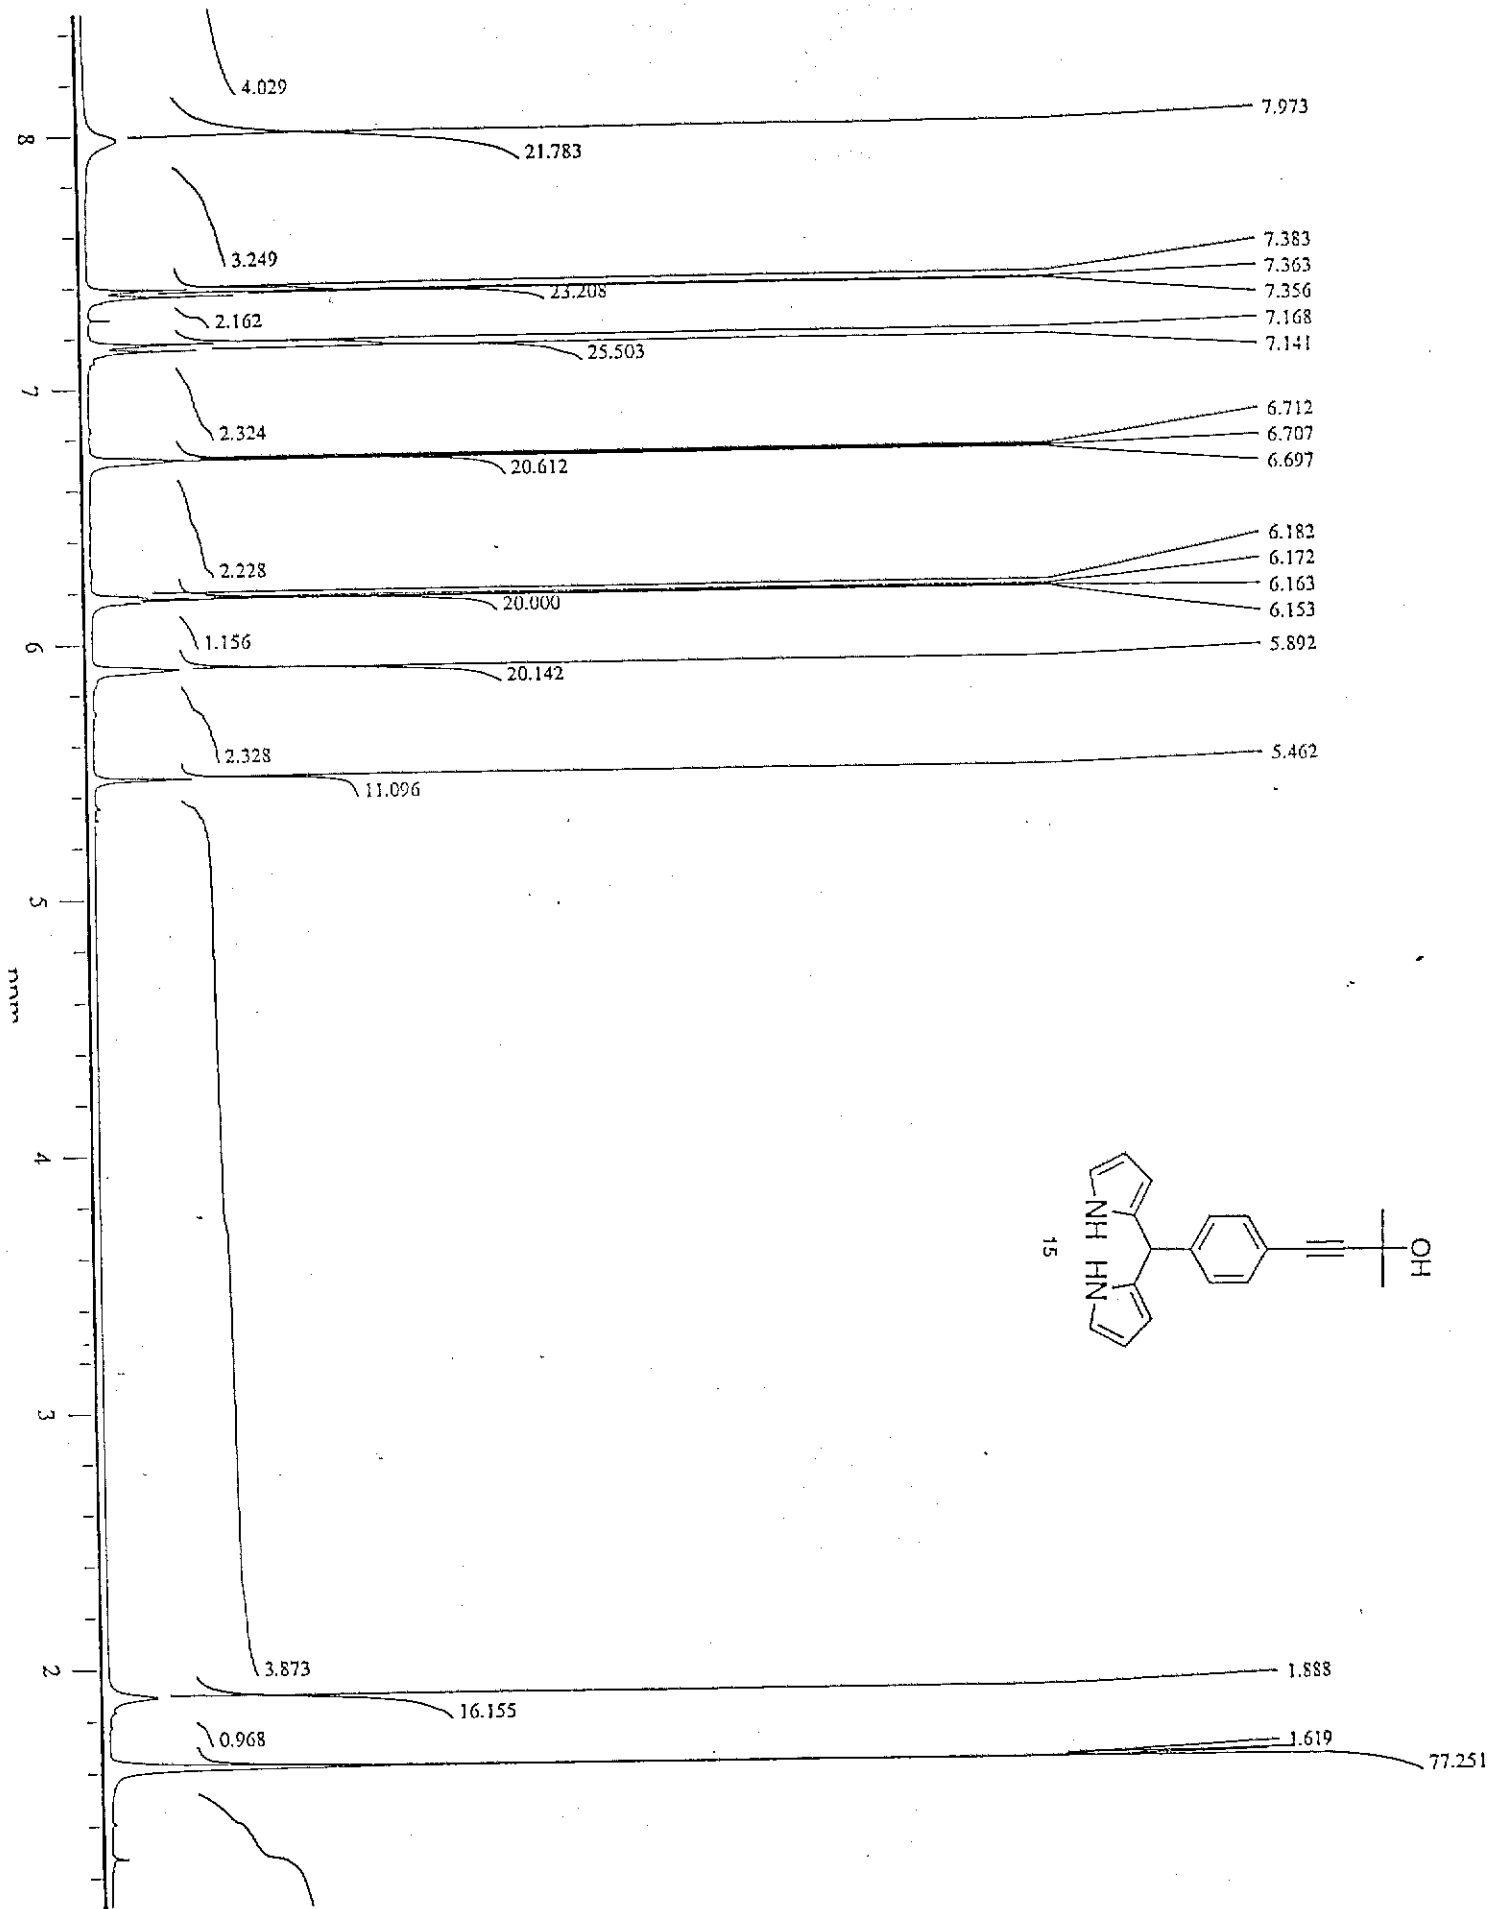

Overlaid Spectra:

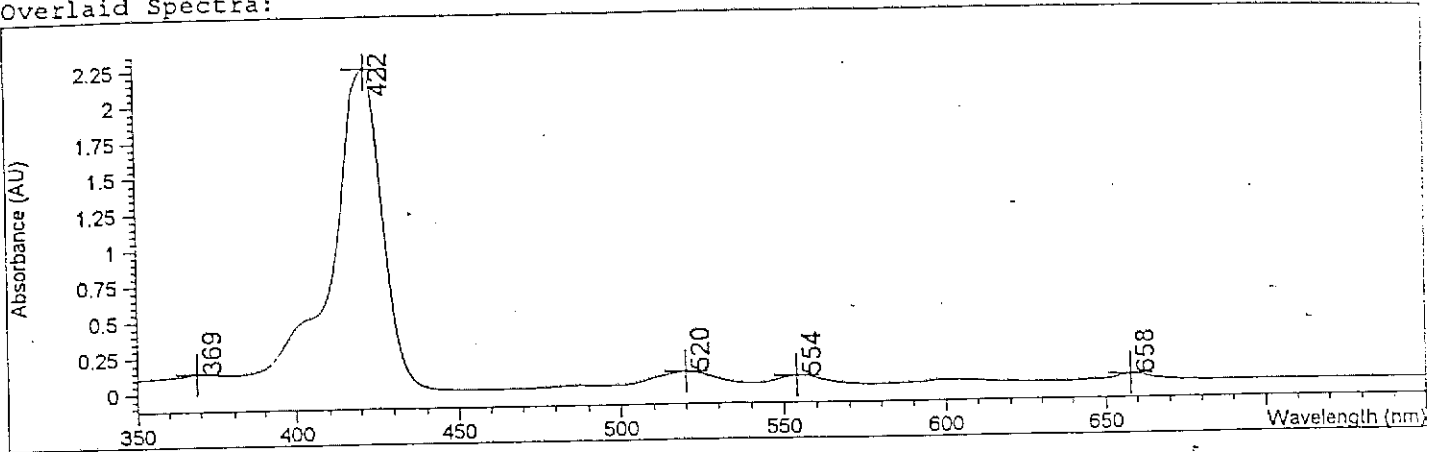

| # | Name | Peaks (nm) | Abs (AU)  |
|---|------|------------|-----------|
| 1 |      | 422.0      | 2.24420   |
| 1 |      | 369.0      | 0.14002   |
| 1 |      | 520.0      | 0.10408   |
| 1 |      | 554.0      | 6.6622E-2 |
| 1 |      | 658.0      | 4.4914E-2 |

Report generated by :

Signature: .....

\*\*\* End Spectrum/Peak Report \*\*\*

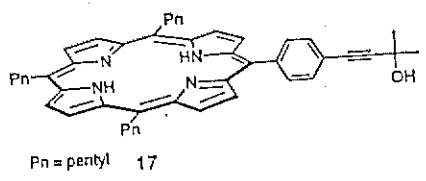

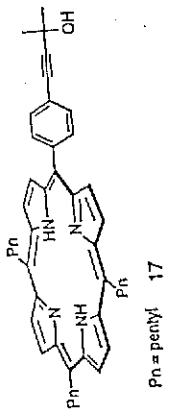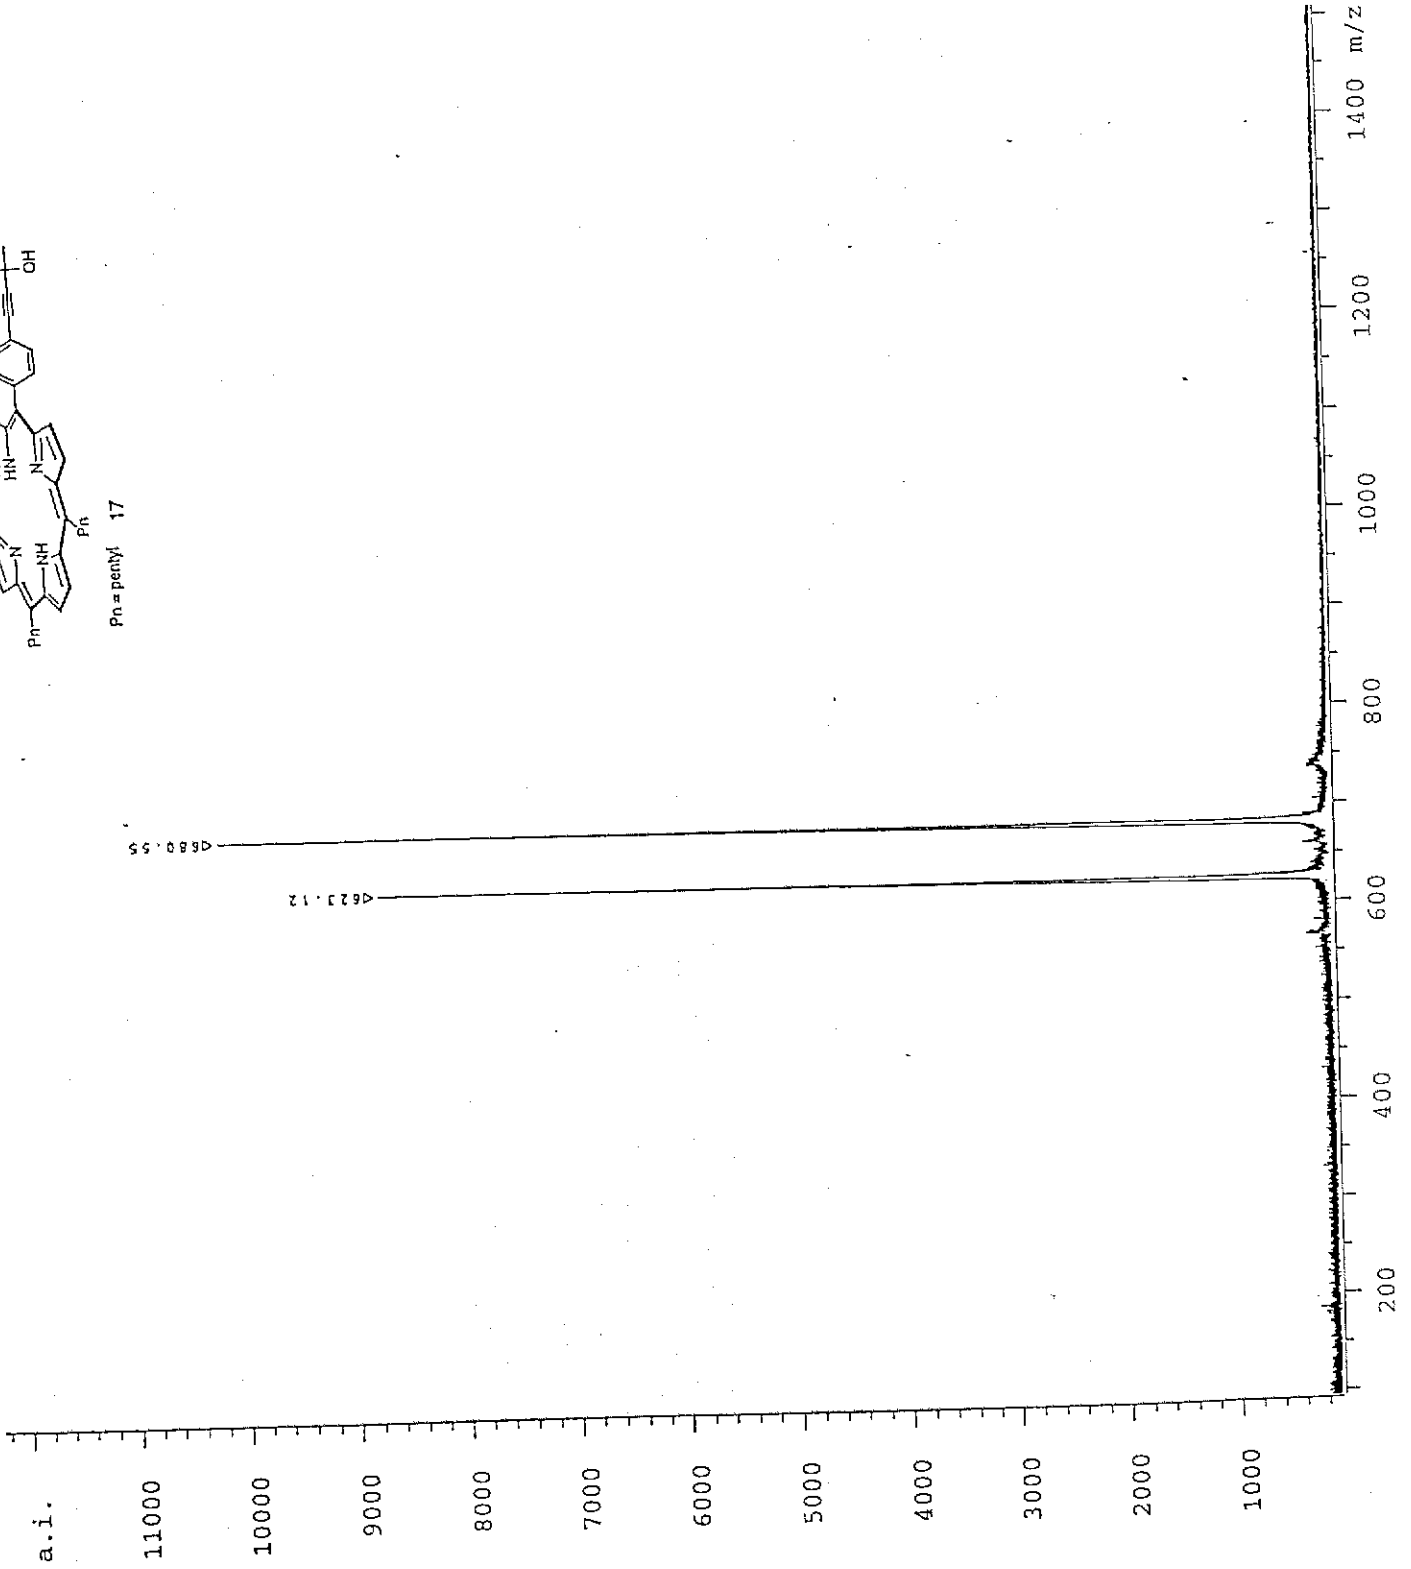



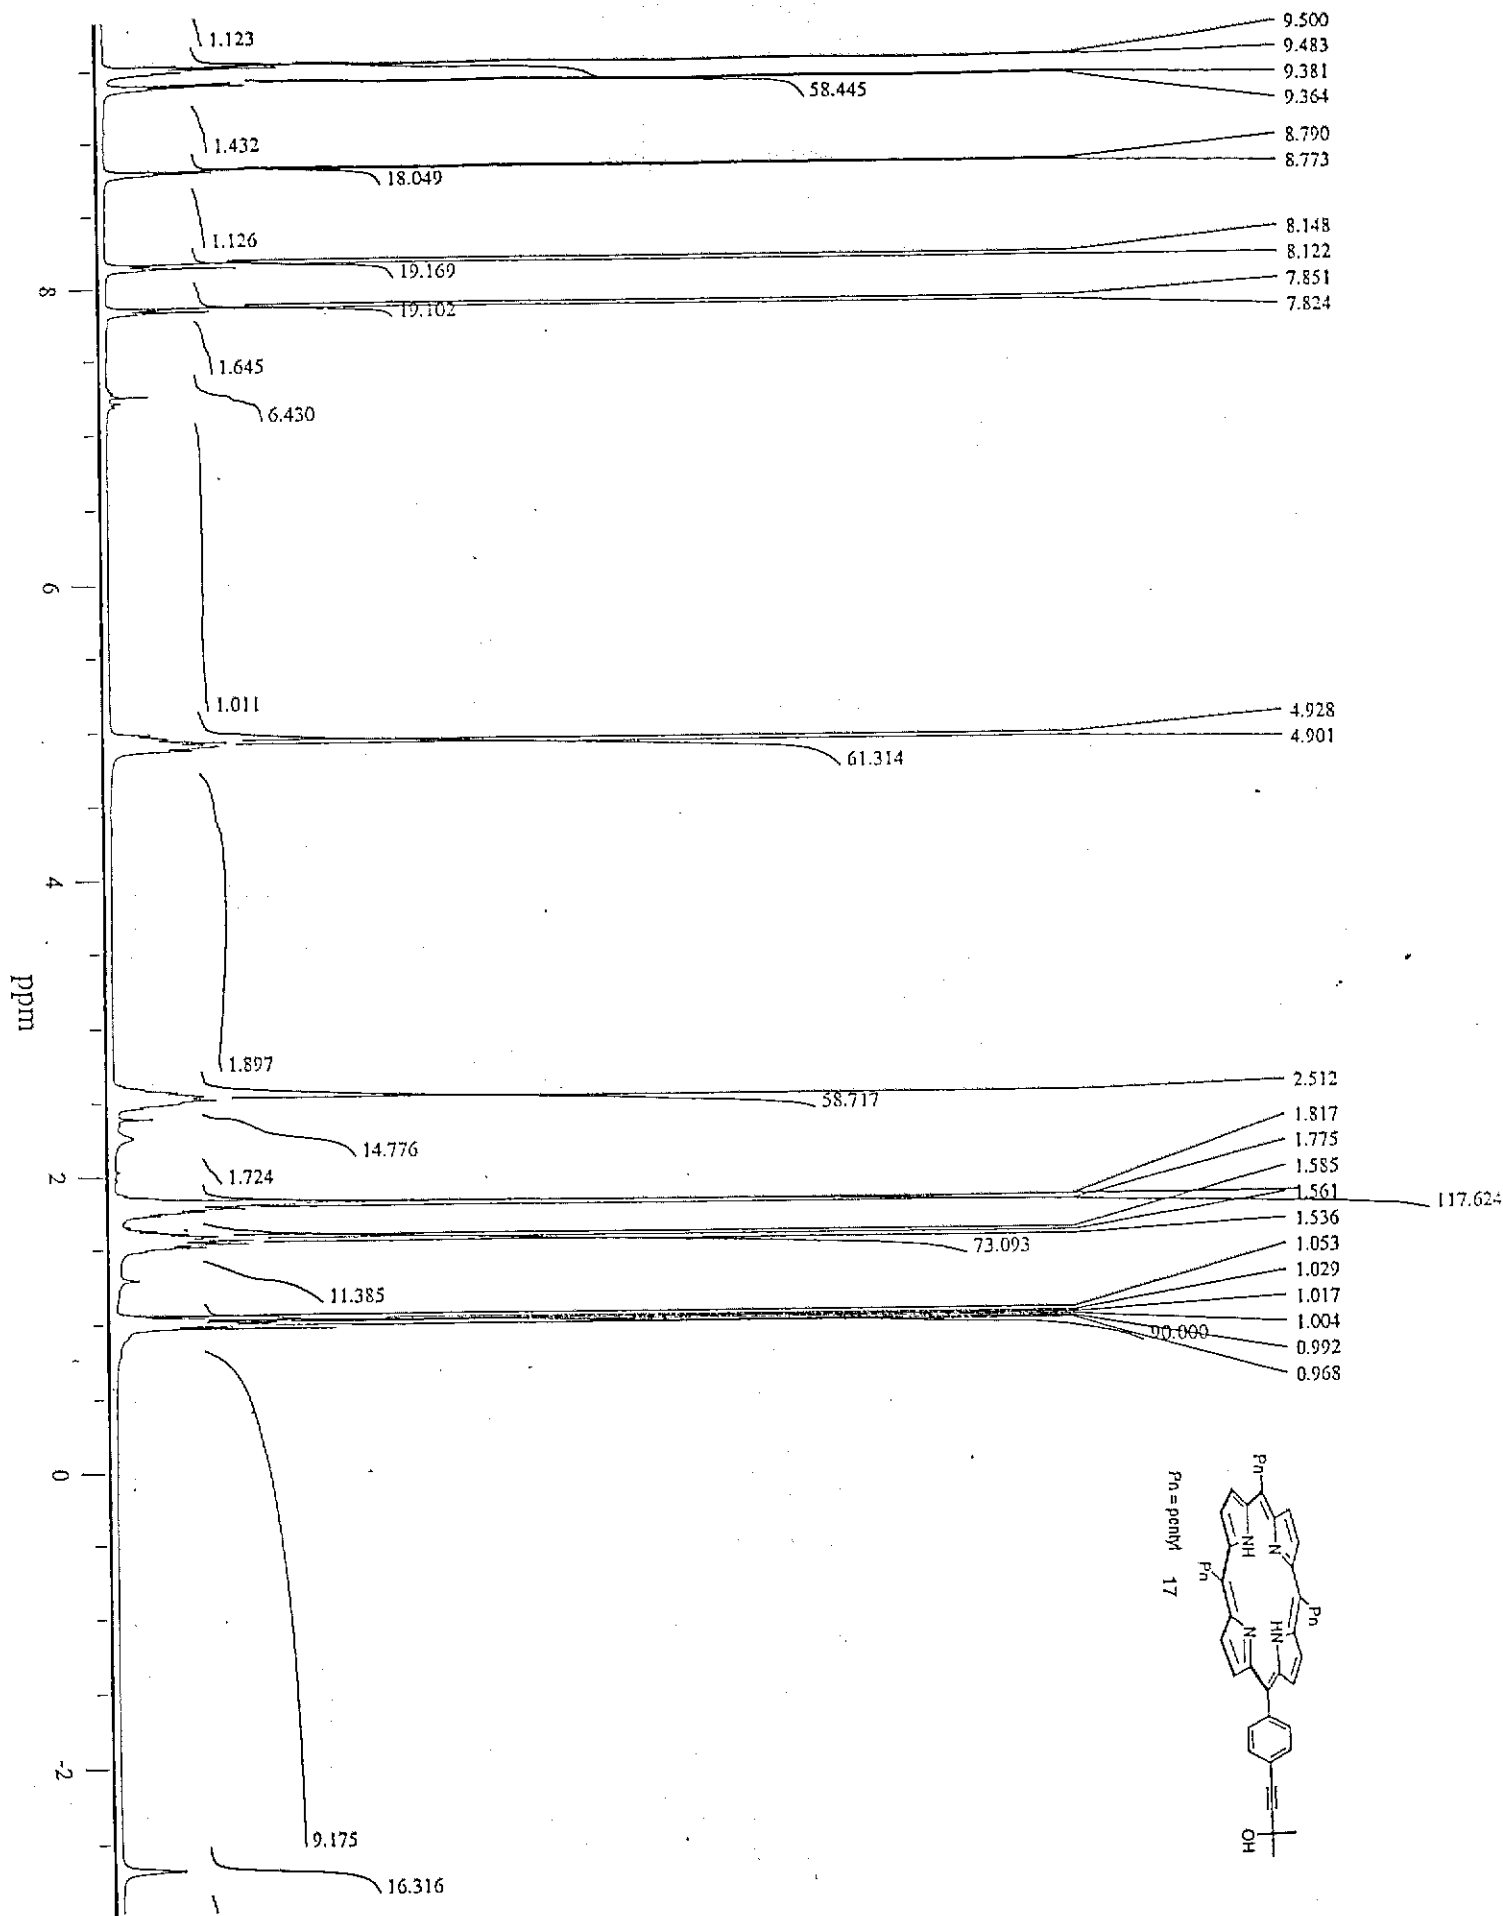

Overlaid Spectra:

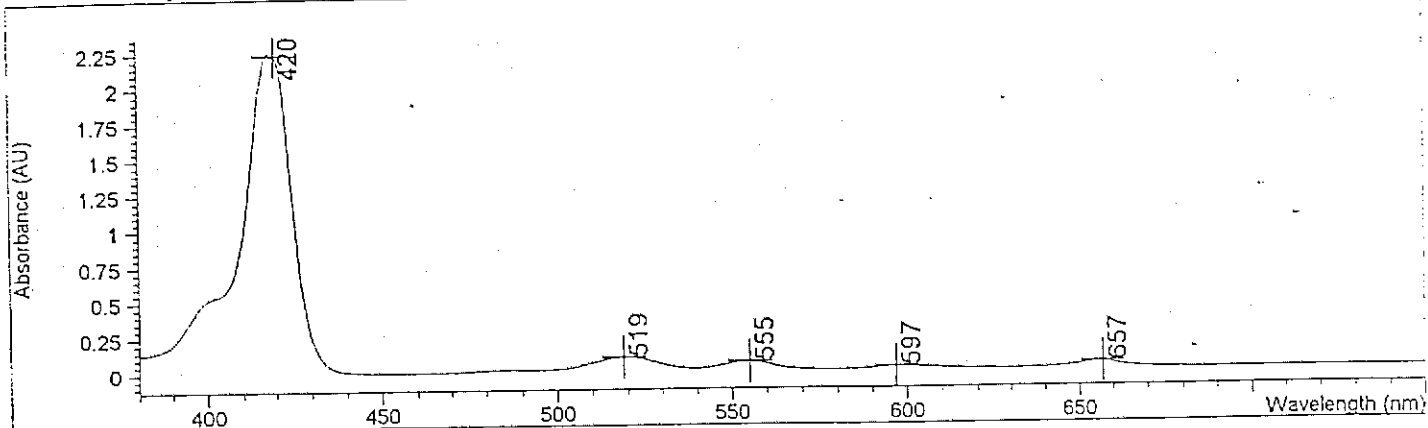

| # | Name | Peaks (nm) | Abs (AU)  |
|---|------|------------|-----------|
| 1 |      | 420.0      | 2.23490   |
| 1 |      | 519.0      | 9.8045E-2 |
| 1 |      | 555.0      | 5.9479E-2 |
| 1 |      | 657.0      | 3.9609E-2 |
| 1 |      | 597.0      | 2.1038E-2 |

Report generated by :

Signature: .....

\*\*\* End Spectrum/Peak Report \*\*\*

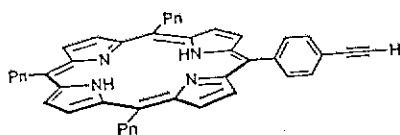

Pn = pentylyl 18
