# Supplementary material for: Studies related to the design and synthesis of a molecular octal counter
Source: Royal Society of Chemistry journal article supplement (doi:10.1039/b008224o), 2001-01-01
Supplement: b008224o9.pdf [file b008224o9.pdf]

Method file : <untitled>  
Information : Default Method  
Data File : C:\HPCHEM\1\DATA\JUNZHONG\TPPCPEU.SD Created : 10/21/99  
14:33:47

Overlaid Spectra:

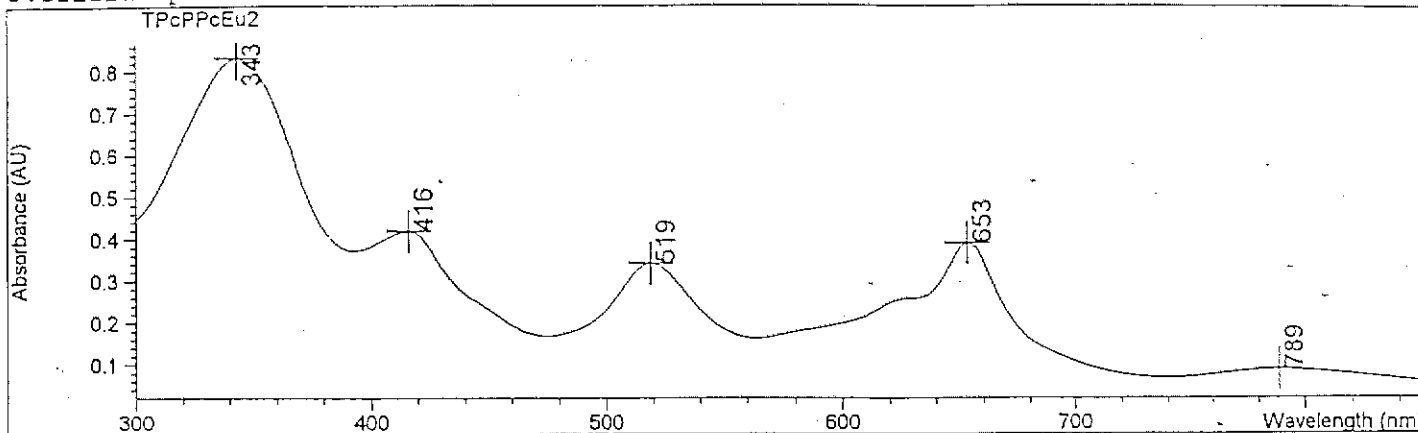

| # | Name      | Peaks (nm) | Abs (AU)  |
|---|-----------|------------|-----------|
| 1 | TPcPPcEu2 | 343.0      | 0.83201   |
| 1 |           | 416.0      | 0.41865   |
| 1 |           | 653.0      | 0.39046   |
| 1 |           | 519.0      | 0.34221   |
| 1 |           | 789.0      | 8.8381E-2 |
| 1 |           | ***        | ***       |

Report generated by :

Signature: .....

\*\*\* End Spectrum/Peak Report \*\*\*

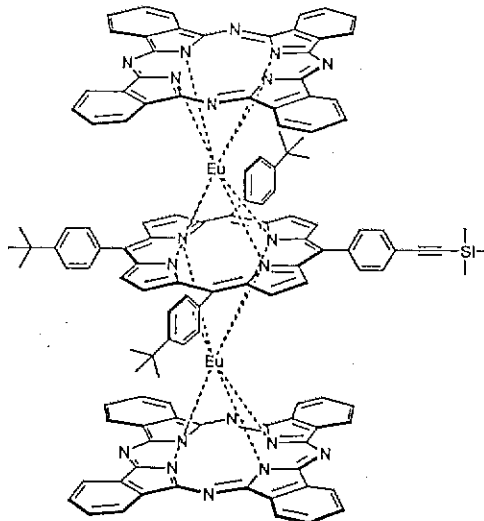

a.i.

5500

5000

4500

4000

3500

3000

2500

2000

1500

1000

500

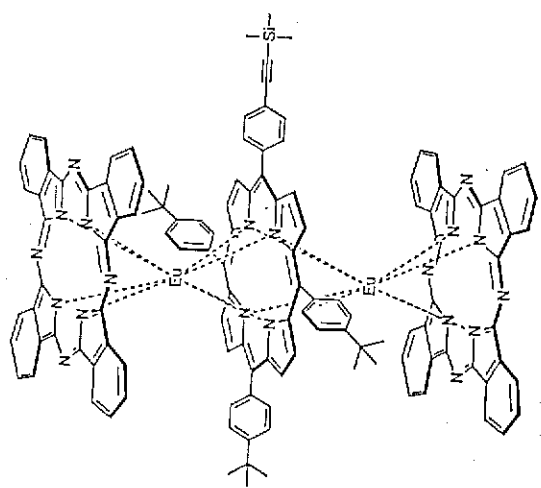

246

42209.15

25275.54

1600 1800 2000 2200 2400 2600 2800 m/z

INSTRUM TOF  
 OpId Unknown  
 SPMRAM 994263  
 ACQ\_DATE Thu Oct 21 11:10:09 1999  
 PATH /data/chemistry/LINDSEY/JUNZHONG  
 PLOT1  
 ACQ\_P1 841  
 ACQ\_P2 841  
 TD 49000  
 REFLECTOR 100  
 HOSHOOTS 0  
 SMOYESI 0  
 SMOYESI2 0  
 SMOYESI3 0  
 DM 0  
 DELAY 1.00 [ns]  
 U1R1 20.00 [KV]  
 U1R2 18.50 [KV]  
 U1R3 0.00 [KV]  
 U1R4 7.50 [KV]  
 U1R5 10.00 [KV]  
 U1R6 0.00 [KV]  
 U1R7 1.55 [KV]  
 U1R8 0.00 [KV]  
 U1R9 7.00 [KV]  
 REPIZ 1.00 [Hz]  
 ATTEN 41.0  
 MLI 28675.54  
 MLI2 351.188  
 MLI3 0.000  
 H1TURBO no  
 CODEON y\*\*  
 CHEELY SHOT  
 DEFLON no  
 RLISRD no  
 RLISRD2 no  
 U1SEIRD no  
 DPCALI 510.84  
 DPHASS 200.00 [Da]  
 RHOVAL 0.33  
 LHMVAL 0.28  
 IS2HDDV 0.7  
 CMI1 (TMSPOr)Euz  
 CMI2 ALIN \*4D, 100 SHOTS



Method file : <untitled>  
Information : Default Method  
Data File : C:\HPCHEM\1\DATA\JUNZHONG\TPPC2EU.SD Created : 10/21/99  
14:28:01

## Overlaid Spectra:

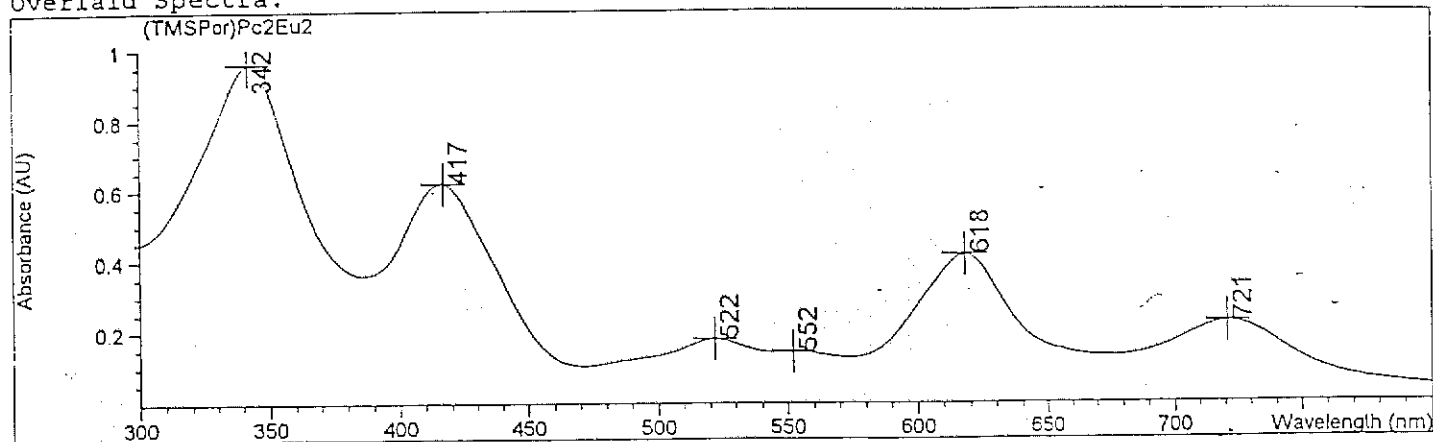

| # | Name           | Peaks (nm) | Abs (AU) |
|---|----------------|------------|----------|
| 1 | (TMSPor)Pc2Eu2 | 342.0      | 0.96130  |
| 1 |                | 417.0      | 0.61941  |
| 1 |                | 618.0      | 0.41655  |
| 1 |                | 721.0      | 0.22575  |
| 1 |                | 522.0      | 0.18118  |
| 1 |                | 552.0      | 0.14512  |

Report generated by :

Signature: .....

\*\*\* End Spectrum/Peak Report \*\*\*

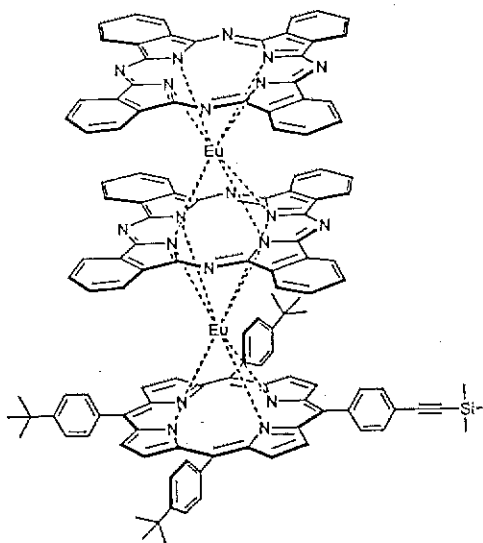

24c



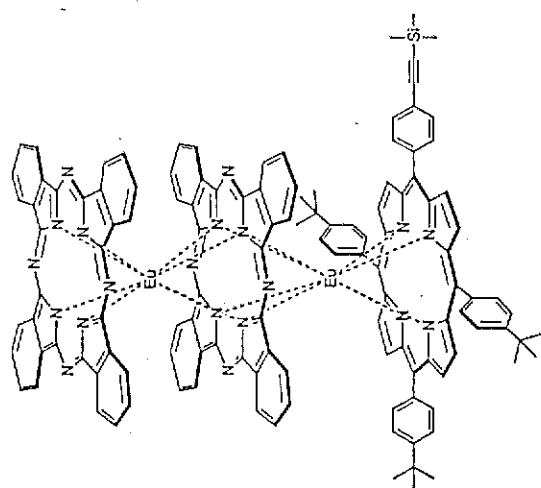

Method file : <untitled>  
Information : Default Method  
Data File : <untitled>

## Overlaid Spectra:

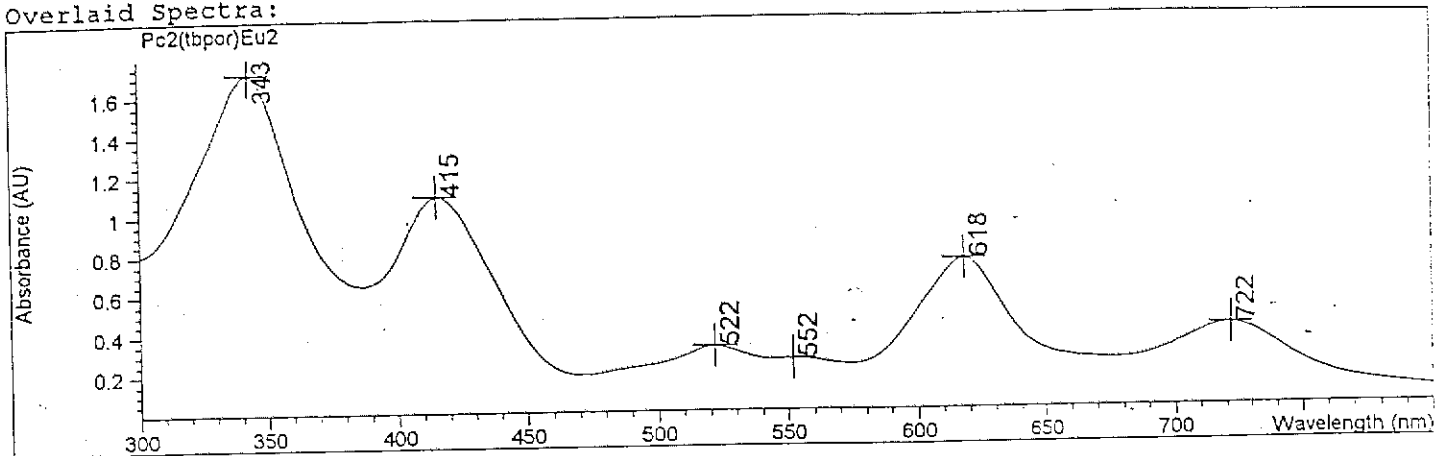

| # | Name            | Peaks (nm) | Abs (AU) |
|---|-----------------|------------|----------|
| 1 | Pc2 (tbpor) Eu2 | 343.0      | 1.71700  |
| 1 |                 | 415.0      | 1.09150  |
| 1 |                 | 618.0      | 0.75169  |
| 1 |                 | 722.0      | 0.40831  |
| 1 |                 | 522.0      | 0.32500  |
| 1 |                 | 552.0      | 0.26125  |

Report generated by :

Signature: .....

\*\*\* End Spectrum/Peak Report \*\*\*

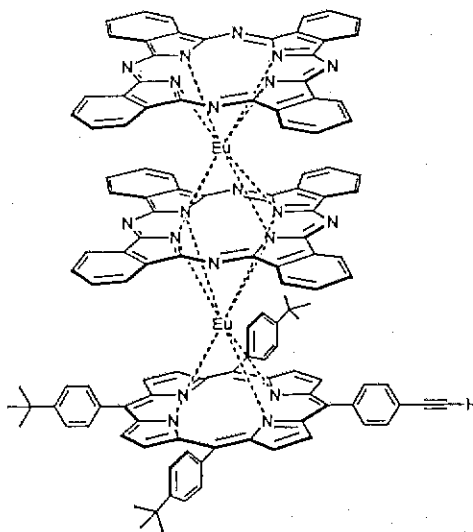





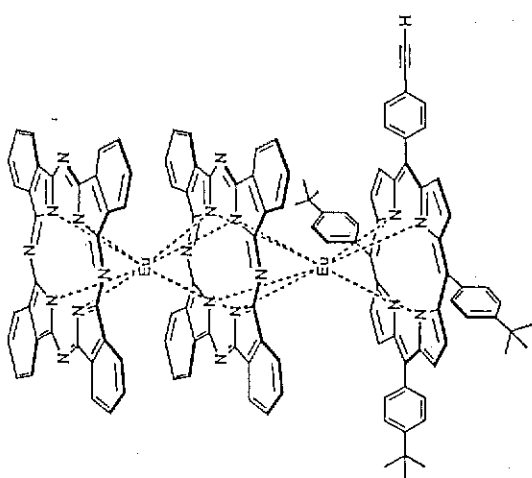

25

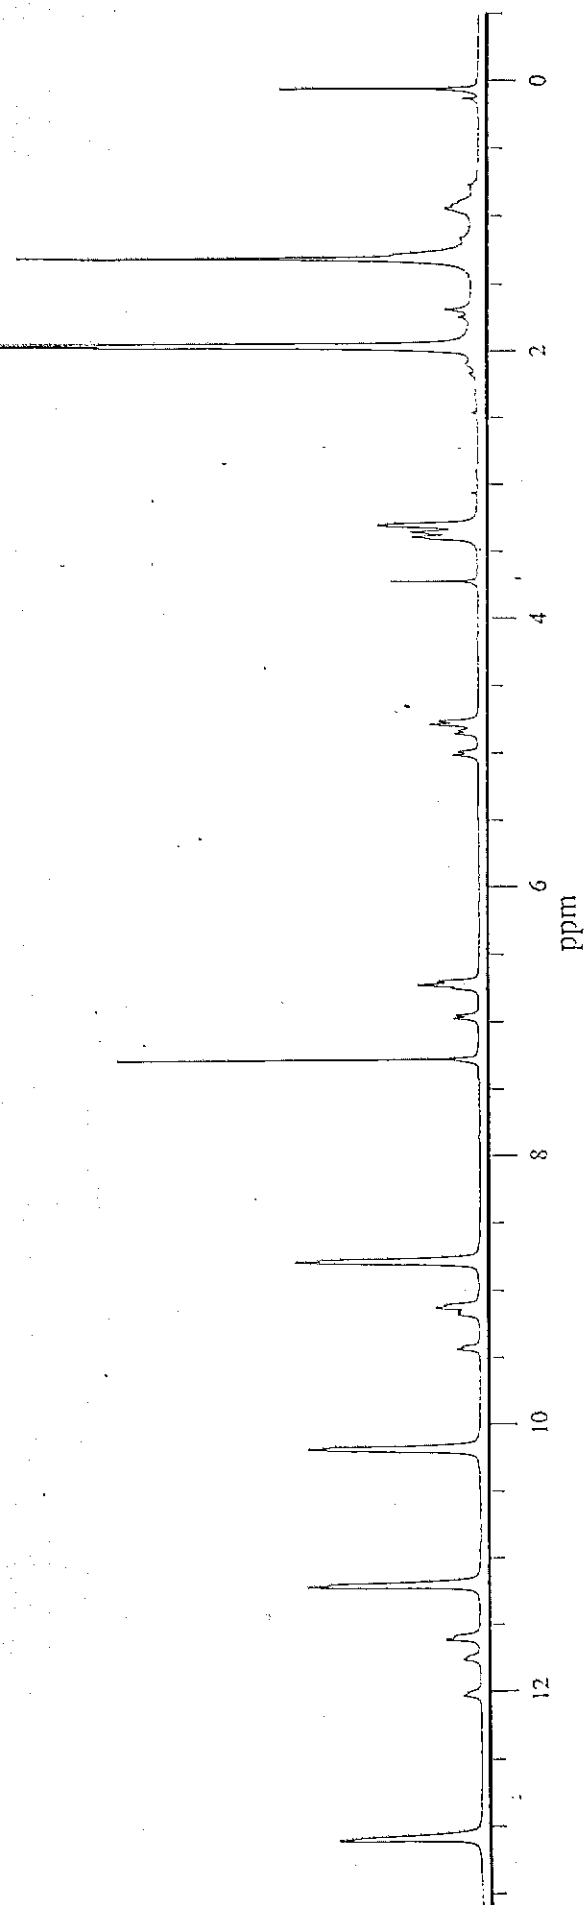

Overlaid Spectra:

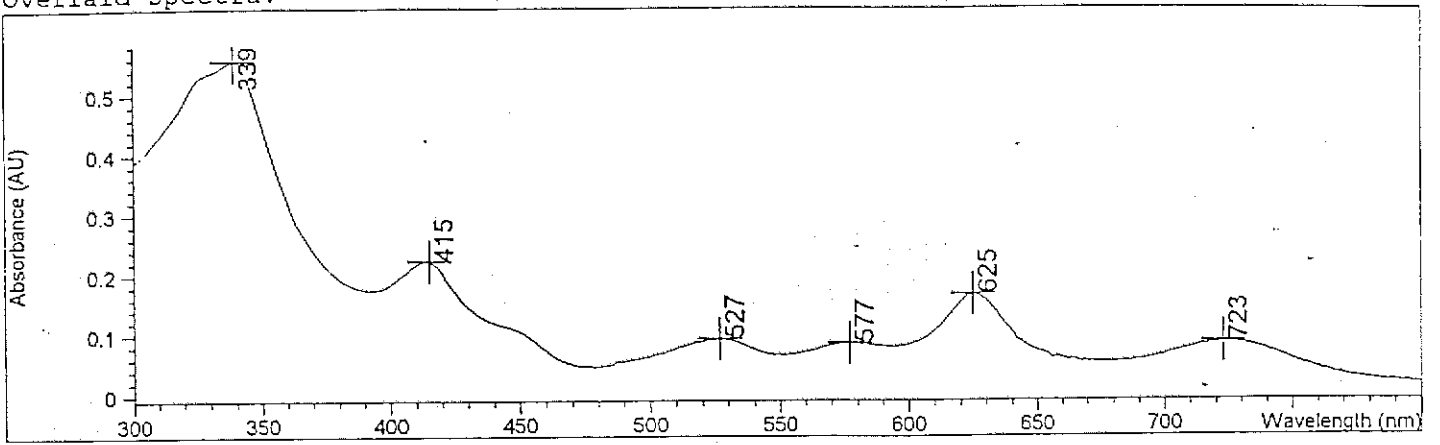

| # | Name | Peaks (nm) | Abs (AU)  |
|---|------|------------|-----------|
| 1 |      | 339.0      | 0.55723   |
| 1 |      | 415.0      | 0.22387   |
| 1 |      | 625.0      | 0.16765   |
| 1 |      | 527.0      | 9.4336E-2 |
| 1 |      | 723.0      | 8.7730E-2 |
| 1 |      | 577.0      | 8.6483E-2 |

Report generated by :

Signature: .....

\*\*\* End Spectrum/Peak Report \*\*\*

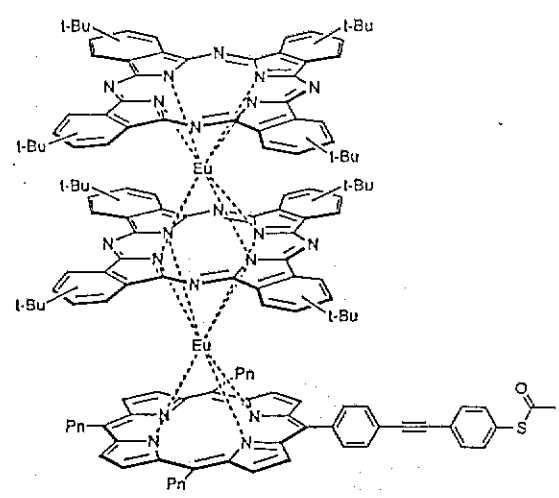

Pn = pentyl  
TD3
