# Supplementary material for: Studies related to the design and synthesis of a molecular octal counter
Source: Royal Society of Chemistry journal article supplement (doi:10.1039/b008224o), 2001-01-01

Overall spectra.

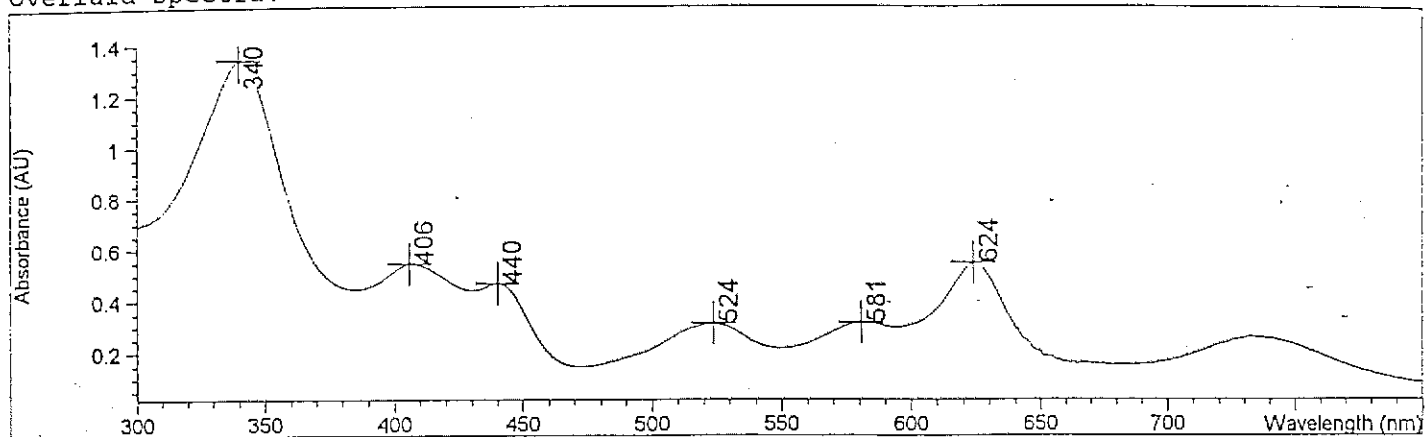

| # | Name | Peaks (nm) | Abs (AU) |
|---|------|------------|----------|
| 1 |      | 340.0      | 1.34100  |
| 1 |      | 624.0      | 0.54988  |
| 1 |      | 406.0      | 0.54604  |
| 1 |      | 440.0      | 0.47110  |
| 1 |      | 581.0      | 0.31807  |
| 1 |      | 524.0      | 0.31355  |

Report generated by :

Signature: .....

\*\*\* End Spectrum/Peak Report \*\*\*

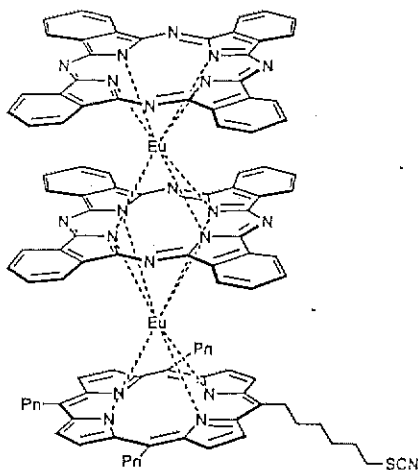

Pn = pentyl

TDSCN

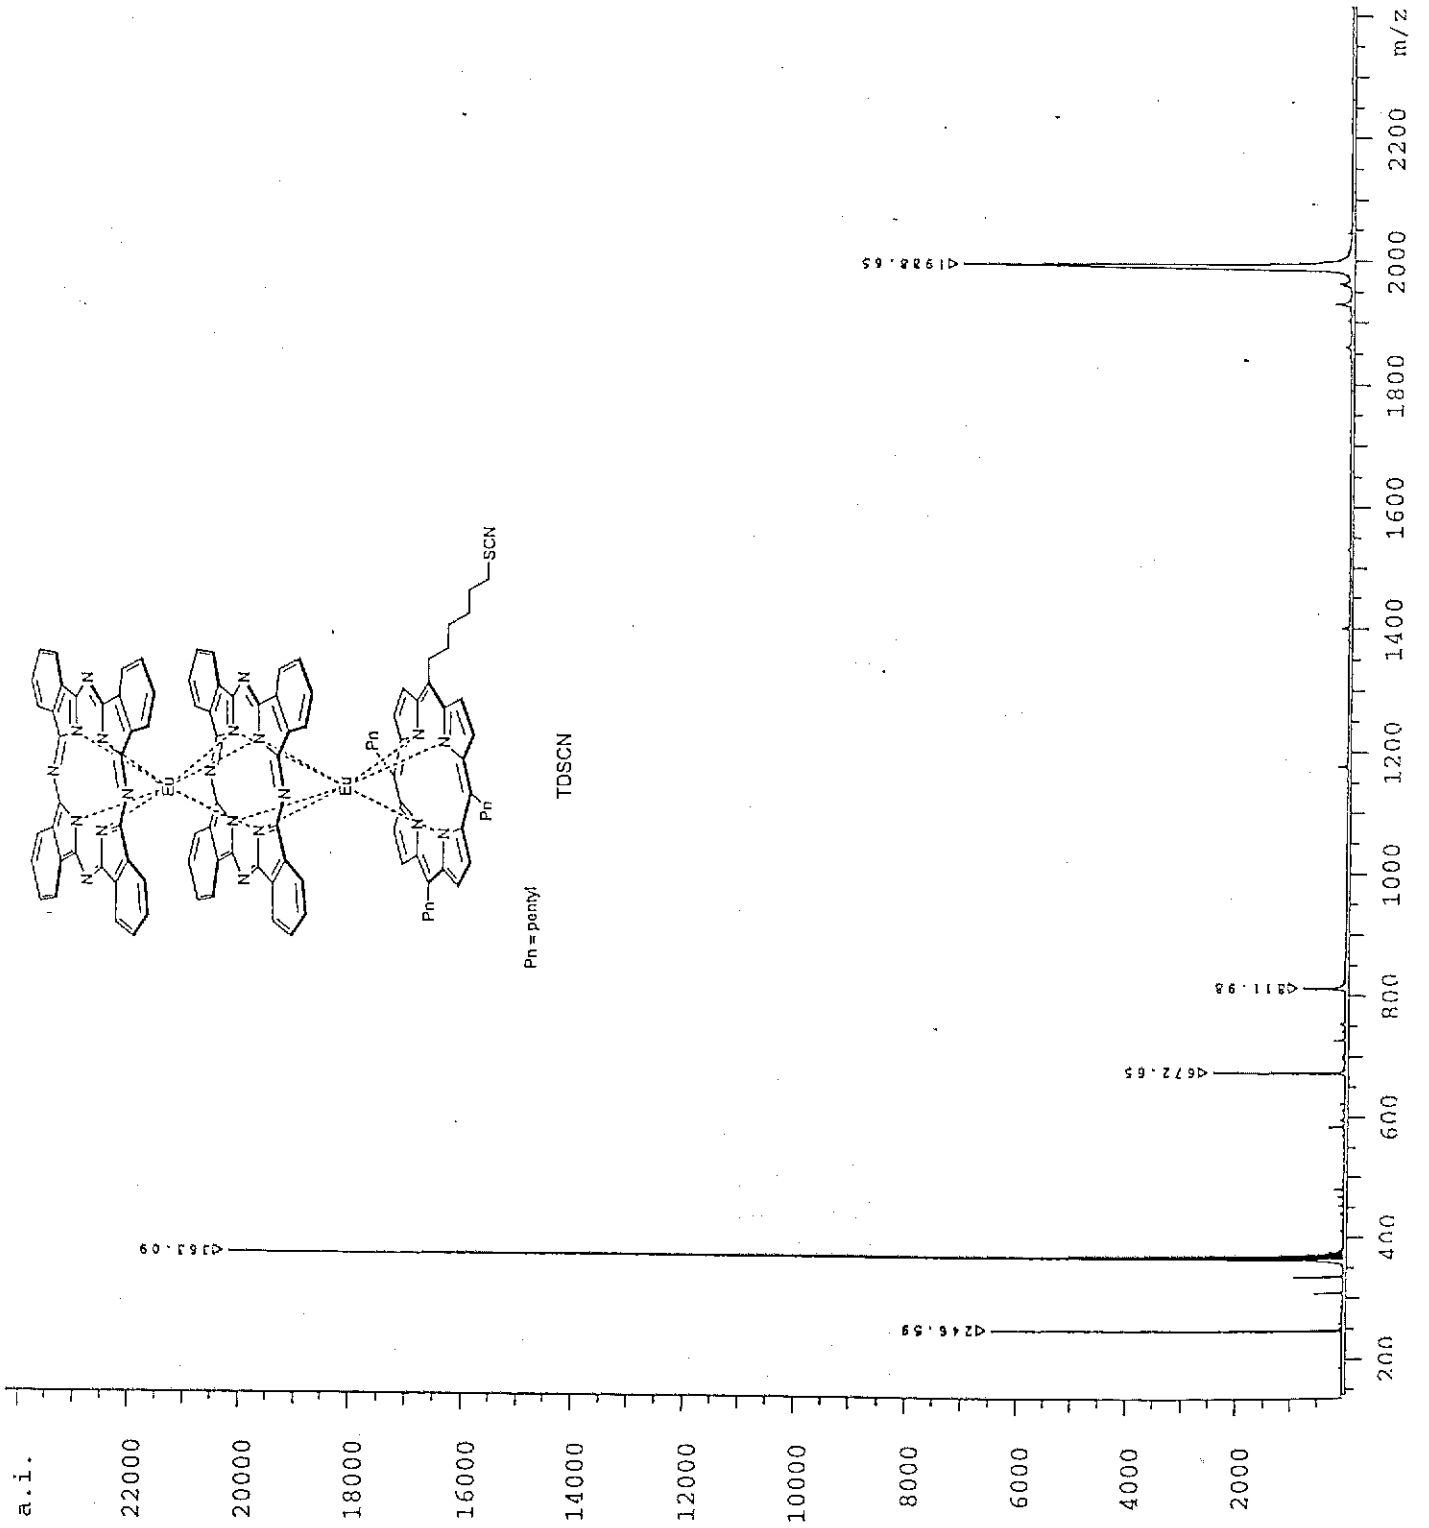

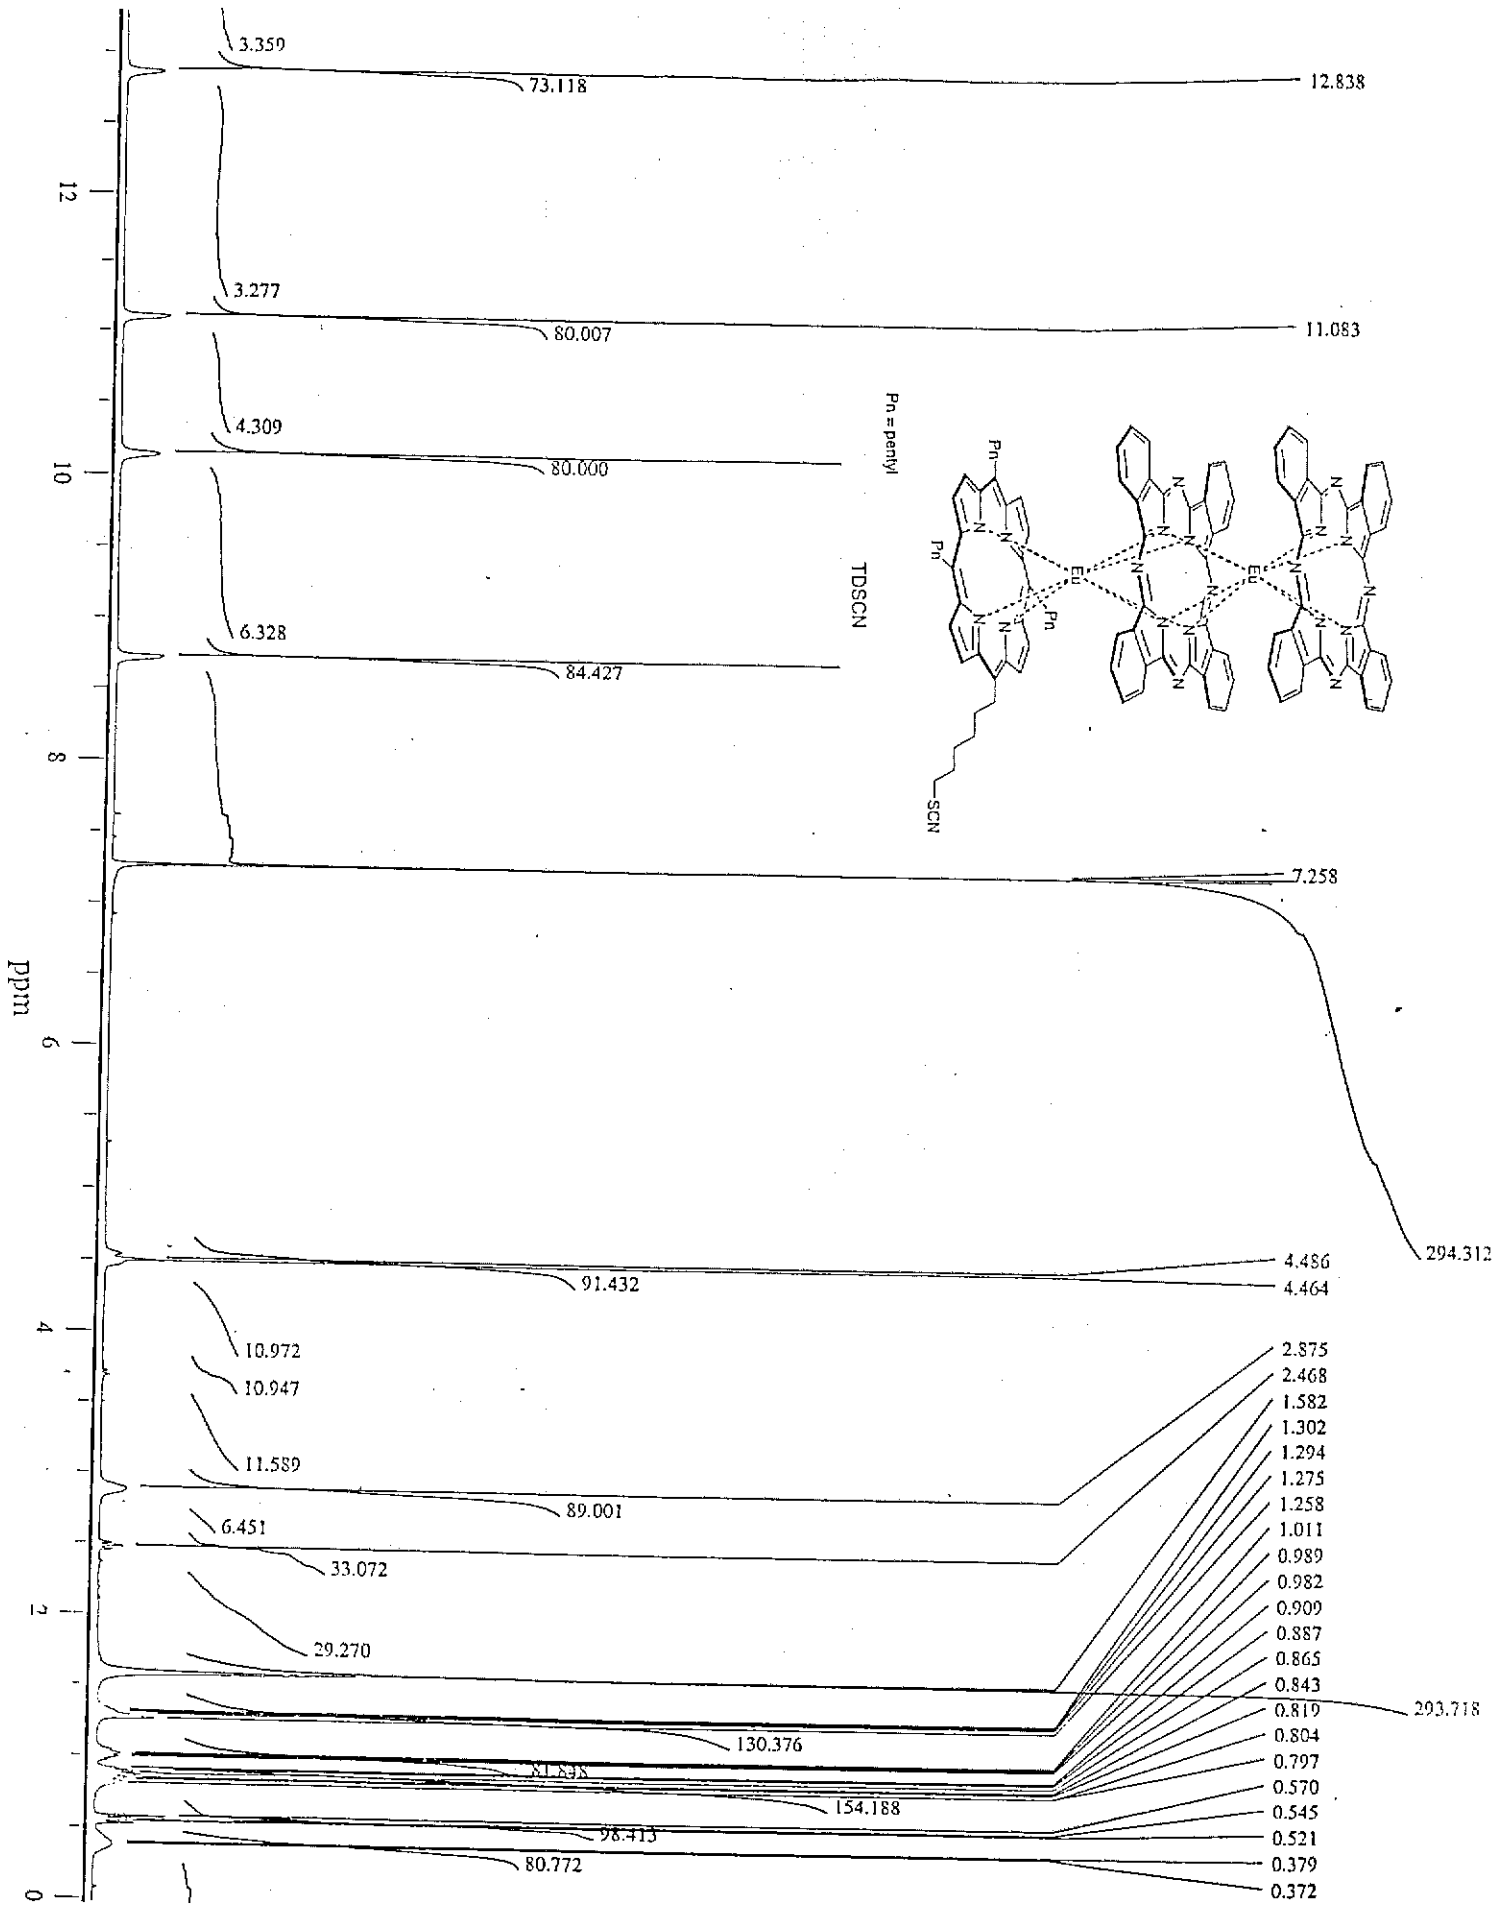

Supplement: b008224o11.pdf [file b008224o11.pdf]
